# Supplementary material for: Highly selective C3–H iodination of pyrrolo[1,2-a]quinoxalines
Source: Royal Society of Chemistry journal article supplement (doi:10.1039/d1ob00759a), 2021-01-01

## Supporting Information

### Highly Selective C3-H Iodination of Pyrrolo[1,2-*a*]quinoxaline

Yali Liu, Yu Wei, Zhen Yang, Yang Li, Yan Liu\* and Ping Liu\*

*School of Chemistry and Chemical Engineering/Key Laboratory for Green Processing  
of Chemical Engineering of Xinjiang Bingtuan, Shihezi University, Shihezi 832004,  
China.*

#### CONTENTS

|                                                |    |
|------------------------------------------------|----|
| 1. Experimental .....                          | 2  |
| 2. Characterization data of the products ..... | 4  |
| 3. NMR spectra of the products .....           | 13 |

## 1. Experimental

Unless otherwise noted, all reactions were performed under an argon atmosphere in Schlenk tubes. Melting points were determined with a fusiometer and are not corrected. The materials obtained from commercial suppliers were used without further purification. For chromatography, Qingdao Ocean Chemical 200-300 mesh silica gel was employed.  $^1\text{H}$  NMR and  $^{13}\text{C}$  NMR spectra were recorded on Bruker Avance III HD 400 MHz spectrometer in  $\text{CDCl}_3$  solution and the chemical shifts are reported in ppm ( $\delta$ ) relative to the internal standard tetramethylsilane (TMS) (0 ppm). High-resolution mass spectra (HRMS) were acquired in electrospray ionization (APCI) mode using a TOF mass analyzer.

### **General procedure for pyrrolo[1,2-*a*]quinoxalines with TBAI (Method A).**

A reaction tube (10 mL) was charged with pyrrolo[1,2-*a*]quinoxaline **1** (0.3 mmol), TBAI (0.6 mmol),  $\text{TsNHNH}_2$  (3 equiv.), TBHP (0.5 mL), and 1,4-dioxane (0.5 mL). Then the mixture was stirred at 80 °C for 12-16 h. After reaction completion, the solution was quenched the saturated solution of sodium thiosulfate (2 mL) and extracted with dichloromethane ( $3 \times 10$  mL). Then, the combined organic layer was dried over anhydrous  $\text{Na}_2\text{SO}_4$ , the solvent was removed under reduced pressure and the crude was purified by flash chromatography on silica gel (petroleum ether/EtOAc) to give the final products **3a-3p**.

### **General procedure for pyrrolo[1,2-*a*]quinoxalines with $\text{I}_2$ in the presence of PTSA· $\text{H}_2\text{O}$ (Method B).**

A reaction tube (10 mL) was charged with pyrrolo[1,2-*a*]quinoxaline **1** (0.2 mmol),  $\text{I}_2$  (0.2 mmol), PTSA· $\text{H}_2\text{O}$  (15 mol%), and DMSO (2 mL). Then the mixture was stirred at 100 °C for 12-22 h. After reaction completion, the solution was quenched the saturated solution of sodium thiosulfate (2 mL) and extracted with EtOAc ( $3 \times 10$  mL). Then, the combined organic layer was dried over anhydrous  $\text{Na}_2\text{SO}_4$ , the solvent was removed under reduced pressure and the crude was purified by flash chromatography on silica gel (petroleum ether/EtOAc) to give the final products **3a-3q**.

### **General procedure for the synthesis of 3q'.**

A reaction tube (10 mL) was charged with indolo[1,2-*a*]quinoxaline (0.3 mmol), TBAI (0.6 mmol), TsNHNH<sub>2</sub> (3 equiv.), TBHP (0.5 mL), and 1,4-dioxane (0.5 mL). Then the mixture was stirred at 80 °C for 12 h. After reaction completion, the solution was quenched the saturated solution of sodium thiosulfate (2 mL) and extracted with dichloromethane (3 × 10 mL). Then, the combined organic layer was dried over anhydrous Na<sub>2</sub>SO<sub>4</sub>, the solvent was removed under reduced pressure and the crude was purified by flash chromatography on silica gel (petroleum ether/EtOAc) to give the corresponding products **3q'**.

### **General procedure for the gram-scale synthesis of 3a.**

A 50 mL round-bottomed flask was charged with **1a** (6 mmol), I<sub>2</sub> (6 mmol), PTSA·H<sub>2</sub>O (15 mol%), and DMSO (15 mL). The solution was stirred at 100 °C for 22 h. After reaction completion, the solution was quenched the saturated solution of sodium thiosulfate (5 mL) and extracted with ethyl acetate (3 × 10 mL). Then, the combined organic layer was dried over anhydrous Na<sub>2</sub>SO<sub>4</sub>, the solvent was removed under reduced pressure and the crude was purified by flash chromatography on silica gel (petroleum ether/EtOAc) to give the final product **3a** (1.306 g, 74% yield).

### **Typical procedure for the Pd-catalyzed Suzuki-Miyaura reactions of 3a with arylboronic acids.**

To a reaction tube equipped with a magnetic stirring bar, **3a** (0.2 mmol), arylboronic acid (0.4 mmol), Pd(PPh<sub>3</sub>)<sub>4</sub> (5 mol%), Na<sub>2</sub>CO<sub>3</sub> (2 equiv.), and 1,4-dioxane/H<sub>2</sub>O (4:1, 2.5 mL) were added. The reaction vessel was allowed to stir at 80 °C for 5 h under N<sub>2</sub> atmosphere. After completion of the reaction, the mixture was washed with the saturated NaCl aqueous solution (10 mL) and extracted with dichloromethane (3 × 10 mL). The organic phase was dried over Na<sub>2</sub>SO<sub>4</sub> and concentrated in a vacuum. The crude was purified by flash chromatography on silica gel (petroleum ether/EtOAc) to give the final product **5a-5h**.

## Typical procedure for the Pd-catalyzed Sonogashira reactions of **3a** with terminal alkynes.

To a reaction tube equipped with a magnetic stirring bar, **3a** (0.2 mmol), terminal alkyne (0.3 mmol), PdCl<sub>2</sub>(PPh<sub>3</sub>)<sub>2</sub> (5 mol%), CuI (20 mol%), and Et<sub>3</sub>N (2.0 mL) were added. The reaction vessel was allowed to stir at 65 °C for 12 h under air atmosphere. After completion of the reaction, an appropriate amount of silica gel was added to the solution, and the mixture was concentrated in a vacuum. The crude was purified by flash chromatography on silica gel (petroleum ether/EtOAc) to give the final product **5i-5n**.

## 2. Characterization data of the products

### *3-iodopyrrolo[1,2-a]quinoxaline [3a]*

Light yellow solid (Method A: 77.6 mg, 88%; Method B: 50.6 mg, 86%); mp 177-178 °C. <sup>1</sup>H NMR (400 MHz, CDCl<sub>3</sub>) δ 8.70 (s, 1H), 7.98 (dd, *J* = 8.0, 1.5 Hz, 1H), 7.88 (d, *J* = 2.8 Hz, 1H), 7.82 (dd, *J* = 8.2, 1.2 Hz, 1H), 7.53 (td, *J* = 8.2, 7.8, 1.5 Hz, 1H), 7.46 (td, *J* = 7.7, 1.4 Hz, 1H), 6.98 (d, *J* = 2.8 Hz, 1H); <sup>13</sup>C NMR (101 MHz, CDCl<sub>3</sub>) δ 145.3, 135.7, 130.2, 128.0, 127.2, 126.4, 125.6, 120.9, 115.4, 113.0, 59.9; HRMS (APCI): *m/z* calcd for C<sub>11</sub>H<sub>7</sub>IN<sub>2</sub> [M+H]<sup>+</sup>: 294.9723, found: 294.9723.

### *8-fluoro-3-iodopyrrolo[1,2-a]quinoxaline [3b]*

Light yellow solid (Method A: 66.5 mg, 71%; Method B: 62.4 mg, 93%); mp 180-181 °C. <sup>1</sup>H NMR (400 MHz, CDCl<sub>3</sub>) δ 8.67 (s, 1H), 7.98 (dd, *J* = 9.0, 5.8 Hz, 1H), 7.82 – 7.76 (m, 2H), 7.50 (dd, *J* = 9.0, 2.7 Hz, 1H), 7.20 (ddd, *J* = 8.9, 8.2, 2.7 Hz, 1H), 7.02 (d, *J* = 2.9 Hz, 1H); <sup>13</sup>C NMR (101 MHz, CDCl<sub>3</sub>) δ 144.7, 132.3, 132.2, 121.6, 115.7, 113.9, 113.7, 100.3, 100.1, 60.3; <sup>19</sup>F NMR (376 MHz, CDCl<sub>3</sub>) δ -109.4; HRMS (APCI): *m/z* calcd for C<sub>11</sub>H<sub>6</sub>FIN<sub>2</sub> [M+H]<sup>+</sup>: 312.9632, found: 312.9624.

### *4-iodo-8-methylpyrrolo[1,2-a]quinoxaline [3c]*

Light yellow solid ((Method A: 62.9 mg, 68%; Method B: 49.3 mg, 80%); mp 175-176 °C. <sup>1</sup>H NMR (400 MHz, CDCl<sub>3</sub>) δ 8.61 (s, 1H), 7.80 (d, *J* = 2.7 Hz, 2H), 7.56 (s, 1H), 7.28 – 7.21 (m, 1H), 6.94 (d, *J* = 2.8 Hz, 1H), 2.52 (s, 3H); <sup>13</sup>C NMR (101 MHz, CDCl<sub>3</sub>) δ 144.5, 138.8, 133.9, 130.0, 127.1, 127.0, 126.7, 121.0, 115.2, 113.2, 59.6, 21.9; HRMS (APCI): *m/z* calcd for C<sub>12</sub>H<sub>9</sub>IN<sub>2</sub> [M+H]<sup>+</sup>: 308.9883, found: 308.9876.

***3-iodo-7-methylpyrrolo[1,2-a]quinoxaline [3d]***

Light yellow solid (Method A: 57.3 mg, 62%; Method B: 61.6 mg, 59%); mp 79-80 °C. <sup>1</sup>H NMR (400 MHz, CDCl<sub>3</sub>) δ 8.64 (s, 1H), 7.80 (d, *J* = 2.7 Hz, 1H), 7.74 (s, 1H), 7.65 (d, *J* = 8.4 Hz, 1H), 7.30 (dd, *J* = 8.4, 1.7 Hz, 1H), 6.93 (d, *J* = 2.8 Hz, 1H), 2.48 (s, 3H); <sup>13</sup>C NMR (101 MHz, CDCl<sub>3</sub>) δ 145.3, 135.8, 135.6, 130.0, 129.3, 126.5, 125.2, 120.8, 115.4, 112.9, 59.7, 21.1; HRMS (APCI): *m/z* calcd for C<sub>12</sub>H<sub>9</sub>IN<sub>2</sub> [M+H]<sup>+</sup> : 308.9883, found: 308.9879.

***4-iodo-4-phenylpyrrolo[1,2-a]quinoxaline [3e]***

Light yellow solid (Method A: 78.9 mg, 71%; Method B: 40.7 mg, 55%); mp 110-111 °C. <sup>1</sup>H NMR (400 MHz, CDCl<sub>3</sub>) δ 8.01 (dd, *J* = 7.9, 1.5 Hz, 1H), 7.94 (d, *J* = 2.9 Hz, 1H), 7.81 (dd, *J* = 8.1, 1.3 Hz, 1H), 7.61 – 7.56 (m, 2H), 7.55 – 7.50 (m, 4H), 7.49 – 7.43 (m, 1H), 7.02 (d, *J* = 2.9 Hz, 1H); <sup>13</sup>C NMR (101 MHz, CDCl<sub>3</sub>) δ 155.4, 137.1, 135.5, 130.3, 129.9, 129.3, 128.2, 127.9, 127.3, 125.8, 124.11, 124.06, 116.3, 113.2, 60.6; HRMS (APCI): *m/z* calcd for C<sub>17</sub>H<sub>11</sub>IN<sub>2</sub> [M+H]<sup>+</sup> : 371.0040, found: 371.0035.

***3-iodo-4-(p-tolyl)pyrrolo[1,2-a]quinoxaline [3f]***

Light yellow solid (Method A: 61.1 mg, 53%; Method B: 40.0 mg, 52%); mp 152-153 °C. <sup>1</sup>H NMR (400 MHz, CDCl<sub>3</sub>) δ 7.99 (dd, *J* = 7.9, 1.5 Hz, 1H), 7.92 (d, *J* = 2.9 Hz, 1H), 7.79 (dd, *J* = 8.1, 1.3 Hz, 1H), 7.51 – 7.40 (m, 4H), 7.32 (d, *J* = 7.8 Hz, 2H), 7.01 (d, *J* = 2.9 Hz, 1H), 2.45 (s, 3H); <sup>13</sup>C NMR (101 MHz, CDCl<sub>3</sub>) δ 155.5, 139.3, 135.6, 134.3, 130.2, 129.8, 128.8, 127.7, 127.3, 125.7, 124.2, 124.0, 116.2, 113.2, 60.6, 21.6; HRMS (APCI): *m/z* calcd for C<sub>18</sub>H<sub>13</sub>IN<sub>2</sub> [M+H]<sup>+</sup> : 385.0196, found: 385.0188.

***3-iodo-4-(4-nitrophenyl)pyrrolo[1,2-a]quinoxaline [3g]***

Light yellow solid (Method A: 80.1 mg, 65%; Method B: 59.0 mg, 71%); mp 202-203 °C. <sup>1</sup>H NMR (400 MHz, CDCl<sub>3</sub>) δ 8.39 (d, *J* = 8.5 Hz, 2H), 8.06 – 7.97 (m, 2H), 7.88 (d, *J* = 8.2 Hz, 1H), 7.78 (d, *J* = 8.4 Hz, 2H), 7.55 (dt, *J* = 34.4, 7.5 Hz, 2H), 7.08 (d, *J* = 3.3 Hz, 1H); <sup>13</sup>C NMR (101 MHz, CDCl<sub>3</sub>) δ 152.9, 148.6, 143.4, 135.2, 131.2, 130.4, 128.7, 127.4, 126.1, 124.3, 123.5, 123.4, 116.7, 113.4, 60.4; HRMS (APCI): *m/z* calcd for C<sub>17</sub>H<sub>10</sub>IN<sub>3</sub>O<sub>2</sub> [M+H]<sup>+</sup> : 415.9890, found: 415.9885.

***4-(4-fluorophenyl)-3-iodopyrrolo[1,2-a]quinoxaline [3h]***

Light yellow solid (Method A: 94.3 mg, 81%; Method B: 58.2 mg, 75%); mp 140-141 °C. <sup>1</sup>H NMR (400 MHz, CDCl<sub>3</sub>) δ 7.98 (dd, *J* = 7.9, 1.4 Hz, 1H), 7.94 (d, *J* = 2.9 Hz, 1H), 7.80 (dd, *J* = 8.2, 1.1 Hz, 1H), 7.60 – 7.42 (m, 4H), 7.20 (d, *J* = 8.7 Hz, 2H), 7.02 (d, *J* = 2.9 Hz, 1H); <sup>13</sup>C NMR (101 MHz, CDCl<sub>3</sub>) δ 154.3, 135.4, 133.2, 133.2, 131.9, 131.8, 130.2, 128.0, 127.3, 125.8, 124.1, 124.0, 116.4, 115.3, 115.1, 113.2, 60.5; <sup>19</sup>F NMR (376 MHz, CDCl<sub>3</sub>) δ -112.0; HRMS (APCI): *m/z* calcd for C<sub>17</sub>H<sub>10</sub>FIN<sub>2</sub> [M+H]<sup>+</sup> : 388.9945, found: 388.9937.

***4-iodo-4-(4-methoxyphenyl)pyrrolo[1,2-a]quinoxaline [3i]***

Light yellow solid (Method A: 70.8 mg, 59%; Method B: 50.4 mg, 63%); mp 176-177 °C. <sup>1</sup>H NMR (400 MHz, CDCl<sub>3</sub>) δ 7.99 (dd, *J* = 7.9, 1.6 Hz, 1H), 7.93 (d, *J* = 2.9 Hz, 1H), 7.80 (dd, *J* = 8.1, 1.4 Hz, 1H), 7.58 – 7.40 (m, 4H), 7.09 – 6.98 (m, 3H), 3.89 (s, 3H); <sup>13</sup>C NMR (101 MHz, CDCl<sub>3</sub>) δ 160.7, 155.1, 135.6, 131.4, 130.1, 129.7, 127.7, 127.2, 125.7, 124.3, 124.0, 116.3, 113.6, 113.2, 60.6, 55.4; HRMS (APCI): *m/z* calcd for C<sub>18</sub>H<sub>13</sub>IN<sub>2</sub>O [M+H]<sup>+</sup> : 401.0145, found: 401.0142.

***5-(4-chlorophenyl)-3-iodopyrrolo[1,2-a]quinoxaline [3j]***

Light yellow solid (Method A: 79.0 mg, 65%; Method B: 55.8 mg, 69%); mp 177-178 °C. <sup>1</sup>H NMR (400 MHz, CDCl<sub>3</sub>) δ 7.79 (d, *J* = 7.9 Hz, 1H), 7.75 (dd, *J* = 5.9, 2.9 Hz, 1H), 7.64 – 7.58 (m, 1H), 7.31 (dq, *J* = 16.3, 7.8 Hz, 6H), 6.83 (t, *J* = 3.4 Hz, 1H); <sup>13</sup>C NMR (101 MHz, CDCl<sub>3</sub>) δ 154.1, 135.6, 135.5, 135.4, 131.4, 130.3, 128.4, 128.1, 127.3, 125.9, 124.1, 123.9, 116.4, 113.2, 60.5; HRMS (APCI): *m/z* calcd for C<sub>17</sub>H<sub>10</sub>ClIN<sub>2</sub> [M+H]<sup>+</sup>: 404.9650, found: 404.9643.

***4-(4-bromophenyl)-3-iodopyrrolo[1,2-a]quinoxaline [3k]***

Light yellow solid (Method A: 110.5 mg, 82%; Method B: 59.3 mg, 66%); mp 163-164 °C. <sup>1</sup>H NMR (400 MHz, CDCl<sub>3</sub>) δ 7.77 (d, *J* = 8.4 Hz, 1H), 7.73 (s, 1H), 7.59 (d, *J* = 8.1 Hz, 1H), 7.46 (dd, *J* = 8.0, 2.0 Hz, 2H), 7.34 – 7.22 (m, 4H), 6.84 – 6.80 (m, 1H); <sup>13</sup>C NMR (101 MHz, CDCl<sub>3</sub>) δ 154.1, 136.0, 135.4, 131.7, 131.3, 130.2, 128.1, 127.3, 125.9, 124.1, 123.81, 123.78, 116.5, 113.2, 60.6; HRMS (APCI): *m/z* calcd for C<sub>17</sub>H<sub>10</sub>BrIN<sub>2</sub> [M+H]<sup>+</sup>: 448.9145, found: 448.9134.

***4-(3-iodopyrrolo[1,2-a]quinoxalin-4-yl)benzotrile [3l]***

Light yellow solid (Method A: 70.0 mg, 59%); mp 238-249 °C. <sup>1</sup>H NMR (400 MHz, CDCl<sub>3</sub>) δ 8.00 – 7.95 (m, 2H), 7.84 (d, *J* = 8.2 Hz, 1H), 7.80 (d, *J* = 8.3 Hz, 2H), 7.69 (d, *J* = 8.3 Hz, 2H), 7.58 – 7.53 (m, 1H), 7.51 – 7.43 (m, 1H), 7.04 (d, *J* = 2.9 Hz, 1H); <sup>13</sup>C NMR (101 MHz, CDCl<sub>3</sub>) δ 152.1, 140.4, 134.1, 130.9, 129.8, 129.2, 127.5, 126.2, 125.0, 123.1, 122.4, 117.7, 115.7, 112.3, 112.0, 59.3; HRMS (APCI): *m/z* calcd for C<sub>17</sub>H<sub>10</sub>BrIN<sub>2</sub> [M+H]<sup>+</sup>: 395.9992, found: 395.9994.

***3-iodo-4-(4-methoxyphenyl)-7-methylpyrrolo[1,2-a]quinoxaline [3m]***

Light yellow solid (Method A: 74.6 mg, 60%; Method B: 58.8 mg, 71%); mp 107-108 °C. <sup>1</sup>H NMR (400 MHz, CDCl<sub>3</sub>) δ 7.89 (d, *J* = 2.9 Hz, 1H), 7.80 – 7.78 (m, 1H), 7.68 (d, *J* = 8.4 Hz, 1H), 7.55 – 7.50 (m, 2H), 7.32 – 7.25 (m, 1H), 7.07 – 7.02 (m, 2H), 6.99 (d, *J* = 2.9 Hz, 1H), 3.89 (s, 3H), 2.47 (s, 3H); <sup>13</sup>C NMR (101 MHz, CDCl<sub>3</sub>) δ 160.7, 155.0, 135.6, 135.5, 131.4, 129.9, 129.8, 128.8, 125.1, 124.2, 123.8, 116.1, 113.5, 112.9, 60.1, 55.4, 21.2; HRMS (APCI): *m/z* calcd for C<sub>19</sub>H<sub>15</sub>IN<sub>2</sub>O [M+H]<sup>+</sup>: 415.0302, found: 415.0298.

***3-iodo-7-methyl-4-(4-nitrophenyl)pyrrolo[1,2-a]quinoxaline [3n]***

Orange solid (Method A: 104.3 mg, 81%; Method B: 55.8 mg, 65%); mp 234-235 °C. <sup>1</sup>H NMR (400 MHz, CDCl<sub>3</sub>) δ 8.37 (d, *J* = 8.8 Hz, 1H), 7.97 (d, *J* = 2.9 Hz, 1H), 7.79 – 7.78 (m, 2H), 7.77 (d, *J* = 2.0 Hz, 1H), 7.75 (dd, *J* = 5.2, 3.2 Hz, 2H), 7.39 (dd, *J* = 8.4, 1.6 Hz, 1H), 7.04 (d, *J* = 2.9 Hz, 1H), 2.50 (s, 3H); <sup>13</sup>C NMR (101 MHz, CDCl<sub>3</sub>) δ 152.8, 148.5, 143.5, 136.1, 135.2, 131.2, 130.1, 129.8, 125.2, 124.0, 123.4, 123.3, 116.6, 113.1, 59.9, 21.2; HRMS (APCI): *m/z* calcd for C<sub>18</sub>H<sub>12</sub>IN<sub>3</sub>O<sub>2</sub> [M+H]<sup>+</sup>: 430.0047, found: 430.0044.

***4-(2,4-dichlorophenyl)-3-iodopyrrolo[1,2-a]quinoxaline [3o]***

Light yellow solid (Method A: 113.3 mg, 86%; Method B: 75.5 mg, 86%); mp 154-155 °C. <sup>1</sup>H NMR (400 MHz, CDCl<sub>3</sub>) δ 8.01 (dd, *J* = 8.0, 1.4 Hz, 1H), 7.96 (d, *J* = 2.9 Hz, 1H), 7.84 (dd, *J* = 8.2, 1.0 Hz, 1H), 7.56 (d, *J* = 1.9 Hz, 2H), 7.50 – 7.45 (m, 1H), 7.43 (dd, *J* = 8.2, 1.9 Hz, 1H), 7.38 (d, *J* = 8.2 Hz, 1H), 7.02 (d, *J* = 2.9 Hz, 1H); <sup>13</sup>C NMR (101 MHz, CDCl<sub>3</sub>) δ 151.8, 135.9, 135.4, 135.3, 134.8, 132.0, 130.4, 129.5, 128.5, 127.7, 127.3, 126.0, 124.0, 123.7, 116.5, 113.4, 60.4; HRMS (APCI): *m/z* calcd for C<sub>17</sub>H<sub>9</sub>Cl<sub>2</sub>IN<sub>2</sub> [M+H]<sup>+</sup>: 438.9260, found: 438.9255.

***4-(furan-2-yl)-3-iodopyrrolo[1,2-a]quinoxaline [3p]***

Brown solid (Method A: 17.3 mg, 16%; Method B: 17.3 mg, 24%); mp 72-73 °C. <sup>1</sup>H NMR (400 MHz, CDCl<sub>3</sub>) δ 8.01 (d, *J* = 8.0 Hz, 1H), 7.94 (d, *J* = 2.9 Hz, 1H), 7.87 – 7.78 (m, 1H), 7.72 – 7.66 (m, 1H), 7.58 – 7.49 (m, 1H), 7.51 – 7.42 (m, 1H), 7.08 (d, *J* = 2.9 Hz, 1H), 6.95 (d, *J* = 3.3 Hz, 1H), 6.63 (dd, *J* = 3.3, 1.8 Hz, 1H); <sup>13</sup>C NMR (101 MHz, CDCl<sub>3</sub>) δ 148.8, 145.3, 143.2, 135.2, 130.4, 129.6, 128.5, 128.5, 127.3, 125.9, 124.3, 116.5, 113.4, 113.2, 111.6; HRMS (APCI): *m/z* calcd for C<sub>15</sub>H<sub>9</sub>IN<sub>2</sub>O [M+H]<sup>+</sup>: 360.9832, found: 360.9823.

***7-iodoindolo[1,2-a]quinoxaline [3q]***

Orange solid (52.3 mg, 76%); mp 195-196 °C. <sup>1</sup>H NMR (400 MHz, CDCl<sub>3</sub>) δ 8.88 (s, 1H), 8.37 – 8.24 (m, 2H), 7.99 (dd, *J* = 7.9, 1.5 Hz, 1H), 7.77 (d, *J* = 8.1 Hz, 1H), 7.55 (ddd, *J* = 8.5, 5.4, 1.7 Hz, 2H), 7.52 – 7.39 (m, 2H); <sup>13</sup>C NMR (101 MHz, CDCl<sub>3</sub>) δ 147.5, 136.4, 132.8, 131.3, 130.7, 130.4, 129.1, 129.0, 125.4, 124.6, 123.5, 123.1, 114.7, 114.5, 58.6; HRMS (APCI): *m/z* calcd for C<sub>15</sub>H<sub>9</sub>IN<sub>2</sub> [M+H]<sup>+</sup>: 344.9883, found: 344.9880.

***4-(furan-3-yl)-3-iodopyrrolo[1,2-a]quinoxaline [3q']***

Orange solid (101.7 mg, 91%); mp 245-246 °C. <sup>1</sup>H NMR (400 MHz, CDCl<sub>3</sub>) δ 9.80 (s, 1H), 8.31 (s, 2H), 8.25 (d, *J* = 9.2 Hz, 1H), 7.95 (d, *J* = 7.9 Hz, 1H), 7.87 (d, *J* = 8.2 Hz, 2H), 7.56 (t, *J* = 7.7 Hz, 1H), 7.46 – 7.36 (m, 3H), 7.13 (d, *J* = 8.2 Hz, 2H), 2.21 (s, 3H); <sup>13</sup>C NMR (101 MHz, CDCl<sub>3</sub>) δ 144.1, 142.9, 139.4, 135.3, 131.3, 130.0, 129.0, 128.8, 128.1, 127.9, 125.3, 125.0, 124.8, 124.7, 124.2, 120.4, 114.5, 114.0, 109.6, 20.4, 0.0; HRMS (APCI): *m/z* calcd for C<sub>22</sub>H<sub>16</sub>N<sub>2</sub>O<sub>2</sub>S [M+H]<sup>+</sup>: 373.1005, found: 373.0997.

***3-phenylpyrrolo[1,2-a]quinoxaline [5a]***

Light yellow solid (44.5 mg, 91%); mp 176-177 °C. <sup>1</sup>H NMR (400 MHz, CDCl<sub>3</sub>) δ 9.03 (s, 1H), 7.96 (dd, *J* = 7.9, 1.6 Hz, 1H), 7.89 (d, *J* = 2.8 Hz, 1H), 7.80 (dd, *J* = 8.2, 1.4 Hz, 1H), 7.67 – 7.62 (m, 2H), 7.49 (td, *J* = 7.6, 1.9 Hz, 3H), 7.43 (td, *J* = 7.6, 1.5 Hz, 1H), 7.39 – 7.34 (m, 1H), 7.00 (d, *J* = 2.8 Hz, 1H); <sup>13</sup>C NMR (101 MHz, CDCl<sub>3</sub>) δ 145.1, 136.1, 134.4, 130.0, 129.0, 128.2, 127.9, 127.0, 125.3, 123.6, 122.6, 114.1, 113.7, 113.6; HRMS (APCI): *m/z* calcd for C<sub>17</sub>H<sub>12</sub>N<sub>2</sub> [M+H]<sup>+</sup>: 245.1073, found: 245.1069.



**3-(*p*-tolyl)pyrrolo[1,2-*a*]quinoxaline [5b]**

Light yellow solid (50.1 mg, 97%); mp 134-135 °C. <sup>1</sup>H NMR (400 MHz, CDCl<sub>3</sub>) δ 9.02 (s, 1H), 7.96 (dd, *J* = 7.9, 1.2 Hz, 1H), 7.92 (d, *J* = 2.6 Hz, 1H), 7.83 (d, *J* = 7.2 Hz, 1H), 7.56 – 7.49 (m, 3H), 7.47 – 7.41 (m, 1H), 7.31 (d, *J* = 7.8 Hz, 2H), 7.00 (d, *J* = 2.7 Hz, 1H), 2.43 (s, 3H); <sup>13</sup>C NMR (101 MHz, CDCl<sub>3</sub>) δ 145.2, 136.9, 136.1, 131.5, 130.0, 129.7, 128.1, 128.0, 127.9, 125.3, 123.7, 122.6, 114.0, 113.7, 113.6, 21.2; HRMS (APCI): *m/z* calcd for C<sub>18</sub>H<sub>14</sub>N<sub>2</sub> [M+H]<sup>+</sup>: 259.1230, found: 259.1227.

**3-(4-methoxyphenyl)pyrrolo[1,2-*a*]quinoxaline [5c]**

Light yellow solid (33.5 mg, 61%); mp 134-135 °C. <sup>1</sup>H NMR (400 MHz, CDCl<sub>3</sub>) δ 8.99 (s, 1H), 7.95 (dd, *J* = 8.0, 1.3 Hz, 1H), 7.91 (d, *J* = 2.7 Hz, 1H), 7.83 (dd, *J* = 8.2, 1.0 Hz, 1H), 7.56 (d, *J* = 2.1 Hz, 2H), 7.51 (td, *J* = 8.3, 7.8, 1.5 Hz, 1H), 7.46 – 7.41 (m, 1H), 7.04 (d, *J* = 8.8 Hz, 2H), 6.97 (d, *J* = 2.8 Hz, 1H), 3.88 (s, 3H); <sup>13</sup>C NMR (101 MHz, CDCl<sub>3</sub>) δ 158.9, 145.2, 136.1, 129.9, 129.3, 128.0, 127.9, 126.9, 125.3, 123.6, 122.5, 114.5, 114.0, 113.7, 113.5, 55.4; HRMS (APCI): *m/z* calcd for C<sub>18</sub>H<sub>14</sub>N<sub>2</sub>O [M+H]<sup>+</sup>: 275.1179, found: 275.1172.

**4-(pyrrolo[1,2-*a*]quinoxalin-3-yl)benzotrile [5d]**

Light yellow solid (52.8 mg, 98%); mp 224-225 °C. <sup>1</sup>H NMR (400 MHz, CDCl<sub>3</sub>) δ 9.02 (s, 1H), 7.99 (dd, *J* = 9.1, 2.2 Hz, 2H), 7.88 (dd, *J* = 8.2, 1.2 Hz, 1H), 7.79 – 7.70 (m, 4H), 7.58 (td, *J* = 8.3, 7.8, 1.5 Hz, 1H), 7.54 – 7.46 (m, 1H), 7.05 (d, *J* = 2.9 Hz, 1H); <sup>13</sup>C NMR (101 MHz, CDCl<sub>3</sub>) δ 144.2, 139.2, 136.1, 132.8, 130.2, 128.5, 128.4, 127.6, 125.9, 122.9, 121.3, 119.0, 114.7, 113.9, 113.8, 110.3; HRMS (APCI): *m/z* calcd for C<sub>18</sub>H<sub>11</sub>N<sub>3</sub> [M+H]<sup>+</sup>: 270.1026, found: 270.1020.

**methyl 4-(pyrrolo[1,2-*a*]quinoxalin-3-yl)benzoate [5e]**

Light yellow solid (31.4 mg, 52%); mp 198-199 °C. <sup>1</sup>H NMR (400 MHz, CDCl<sub>3</sub>) δ 9.06 (s, 1H), 8.15 (d, *J* = 8.4 Hz, 2H), 8.02 – 7.95 (m, 2H), 7.88 (dd, *J* = 8.2, 1.1 Hz, 1H), 7.71 (d, *J* = 8.4 Hz, 2H), 7.56 (td, *J* = 8.3, 7.8, 1.5 Hz, 1H), 7.51 – 7.46 (m, 1H), 7.08 (d, *J* = 2.8 Hz, 1H), 3.96 (s, 3H); <sup>13</sup>C NMR (101 MHz, CDCl<sub>3</sub>) δ 166.9, 144.7, 139.1, 136.1, 130.4, 130.1, 128.5, 128.3, 127.9, 127.8, 125.7, 122.9, 122.3, 114.5, 113.82, 113.80, 52.2; HRMS (APCI): *m/z* calcd for C<sub>19</sub>H<sub>14</sub>N<sub>2</sub>O<sub>2</sub> [M+H]<sup>+</sup>: 303.1128, found: 303.1123.

**3-(4-vinylphenyl)pyrrolo[1,2-a]quinoxaline [5f]**

Light yellow solid (36.2 mg, 67%); mp 99-100 °C. <sup>1</sup>H NMR (400 MHz, CDCl<sub>3</sub>) δ 9.05 (s, 1H), 7.97 (dd, *J* = 8.0, 1.4 Hz, 1H), 7.94 (d, *J* = 2.7 Hz, 1H), 7.85 (dd, *J* = 8.2, 1.2 Hz, 1H), 7.62 (d, *J* = 8.3 Hz, 2H), 7.54 (dt, *J* = 6.4, 1.9 Hz, 3H), 7.48 – 7.43 (m, 1H), 7.03 (d, *J* = 2.8 Hz, 1H), 6.78 (dd, *J* = 17.6, 10.9 Hz, 1H), 5.82 (dd, *J* = 17.6, 0.7 Hz, 1H), 5.30 (dd, *J* = 10.9, 0.7 Hz, 1H); <sup>13</sup>C NMR (101 MHz, CDCl<sub>3</sub>) δ 145.1, 136.4, 136.1, 133.9, 130.0, 128.3, 128.0, 127.9, 126.9, 125.4, 123.3, 122.7, 114.2, 113.9, 113.7, 113.6; HRMS (APCI): *m/z* calcd for C<sub>19</sub>H<sub>14</sub>N<sub>2</sub> [M+H]<sup>+</sup>: 271.1230, found: 271.1227.

**3-(naphthalen-2-yl)pyrrolo[1,2-a]quinoxaline [5g]**

Light yellow solid (57.1 mg, 97%); mp 78-79 °C. <sup>1</sup>H NMR (400 MHz, CDCl<sub>3</sub>) δ 9.14 (s, 1H), 8.08 (s, 1H), 7.99 (dd, *J* = 7.9, 1.4 Hz, 1H), 7.96 – 7.91 (m, 2H), 7.88 (dt, *J* = 4.8, 2.4 Hz, 2H), 7.82 (dd, *J* = 8.1, 1.1 Hz, 1H), 7.76 (dd, *J* = 8.4, 1.7 Hz, 1H), 7.55 – 7.49 (m, 3H), 7.45 (td, *J* = 7.7, 1.4 Hz, 1H), 7.10 (d, *J* = 2.8 Hz, 1H); <sup>13</sup>C NMR (101 MHz, CDCl<sub>3</sub>) δ 145.1, 136.2, 133.8, 132.4, 131.8, 130.0, 128.7, 128.0, 127.9, 127.8, 126.7, 126.6, 126.5, 125.9, 125.4, 123.6, 122.9, 114.3, 113.8, 113.7; HRMS (APCI): *m/z* calcd for C<sub>21</sub>H<sub>14</sub>N<sub>2</sub> [M+H]<sup>+</sup>: 295.1230, found: 295.1227.

**3-(thiophen-3-yl)pyrrolo[1,2-a]quinoxaline [5h]**

Light yellow solid (49.6 mg, 99%); mp 64-65 °C. <sup>1</sup>H NMR (400 MHz, CDCl<sub>3</sub>) δ 9.02 (s, 1H), 7.93 (dd, *J* = 7.9, 1.5 Hz, 1H), 7.84 (d, *J* = 2.7 Hz, 1H), 7.78 (dd, *J* = 8.1, 1.2 Hz, 1H), 7.49 – 7.41 (m, 4H), 7.39 (dd, *J* = 4.6, 1.7 Hz, 1H), 6.96 (d, *J* = 2.8 Hz, 1H); <sup>13</sup>C NMR (101 MHz, CDCl<sub>3</sub>) δ 144.9, 136.1, 134.8, 130.0, 128.0, 127.8, 127.5, 126.4, 125.3, 122.6, 120.6, 118.1, 114.0, 113.7, 113.5; HRMS (APCI): *m/z* calcd for C<sub>15</sub>H<sub>10</sub>N<sub>2</sub>S [M+H]<sup>+</sup>: 251.0637, found: 251.0634.

**3-(phenylethynyl)pyrrolo[1,2-a]quinoxaline [5i]**

Light yellow solid (47.8 mg, 89%); mp 140-141 °C. <sup>1</sup>H NMR (400 MHz, CDCl<sub>3</sub>) δ 9.00 (s, 1H), 7.98 (d, *J* = 7.9 Hz, 1H), 7.83 – 7.76 (m, 2H), 7.61 – 7.57 (m, 2H), 7.55 – 7.49 (m, 1H), 7.49 – 7.44 (m, 1H), 7.37 (q, *J* = 7.0, 6.5 Hz, 3H), 7.00 (d, *J* = 2.9 Hz, 1H); <sup>13</sup>C NMR (101 MHz, CDCl<sub>3</sub>) δ 143.5, 135.3, 130.4, 129.2, 127.3, 127.2, 127.1, 126.54, 126.49, 124.7, 122.4, 115.9, 112.9, 112.7, 101.7, 91.5, 81.0; HRMS (APCI): *m/z* calcd for C<sub>19</sub>H<sub>12</sub>N<sub>2</sub> [M+H]<sup>+</sup>: 269.1073, found: 269.1071.

**3-(*p*-tolylethynyl)pyrrolo[1,2-*a*]quinoxaline [5j]**

Light yellow solid (54.2 mg, 96%); mp 179-180 °C. <sup>1</sup>H NMR (400 MHz, CDCl<sub>3</sub>) δ 9.01 (s, 1H), 7.99 (d, *J* = 7.9 Hz, 1H), 7.83 (s, 2H), 7.51 (dd, *J* = 19.3, 7.8 Hz, 4H), 7.18 (d, *J* = 7.6 Hz, 2H), 7.00 (s, 1H), 2.38 (s, 3H); <sup>13</sup>C NMR (101 MHz, CDCl<sub>3</sub>) δ 144.7, 138.3, 136.4, 131.4, 130.3, 129.2, 128.2, 127.7, 127.6, 125.7, 120.3, 117.0, 113.9, 113.8, 103.1, 92.7, 81.3, 21.6; HRMS (APCI): *m/z* calcd for C<sub>20</sub>H<sub>14</sub>N<sub>2</sub> [M+H]<sup>+</sup>: 283.1230, found: 283.1228.

**3-([1,1'-biphenyl]-4-ylethynyl)pyrrolo[1,2-*a*]quinoxaline [5k]**

Light yellow solid (54.4 mg, 79%); mp 157-158 °C. <sup>1</sup>H NMR (400 MHz, CDCl<sub>3</sub>) δ 9.04 (s, 1H), 8.01 (dd, *J* = 7.9, 1.5 Hz, 1H), 7.82 (dd, *J* = 8.4, 1.6 Hz, 2H), 7.66 (d, *J* = 8.6 Hz, 2H), 7.64 – 7.61 (m, 3H), 7.61 – 7.58 (m, 1H), 7.55 (td, *J* = 8.2, 7.8, 1.6 Hz, 1H), 7.51 – 7.48 (m, 1H), 7.45 (d, *J* = 7.8 Hz, 2H), 7.38 (d, *J* = 7.3 Hz, 1H), 7.03 (d, *J* = 2.8 Hz, 1H); <sup>13</sup>C NMR (101 MHz, CDCl<sub>3</sub>) δ 144.6, 140.8, 140.4, 136.4, 133.0, 131.9, 130.4, 128.92, 128.89, 128.3, 127.6, 127.12, 127.09, 127.05, 127.0, 125.8, 122.3, 117.1, 114.0, 113.8, 102.9, 92.5, 82.8; HRMS (APCI): *m/z* calcd for C<sub>25</sub>H<sub>16</sub>N<sub>2</sub> [M+H]<sup>+</sup>: 345.1386, found: 345.1384.

**3-((4-methoxyphenyl)ethynyl)pyrrolo[1,2-*a*]quinoxaline [5l]**

Light yellow solid (31.0 mg, 52%); mp 187-188 °C. <sup>1</sup>H NMR (400 MHz, CDCl<sub>3</sub>) δ 9.00 (s, 1H), 8.01 – 7.96 (m, 1H), 7.85 – 7.79 (m, 2H), 7.53 (dd, *J* = 9.0, 2.1 Hz, 3H), 7.49 – 7.45 (m, 1H), 6.99 (d, *J* = 2.8 Hz, 1H), 6.90 (d, *J* = 8.9 Hz, 2H), 3.84 (s, 3H); <sup>13</sup>C NMR (101 MHz, CDCl<sub>3</sub>) δ 159.6, 144.7, 136.4, 132.9, 130.3, 128.2, 127.7, 127.5, 125.7, 116.9, 115.5, 114.1, 113.9, 113.8, 103.2, 92.5, 80.6, 55.3; HRMS (APCI): *m/z* calcd for C<sub>20</sub>H<sub>14</sub>N<sub>2</sub>O [M+H]<sup>+</sup>: 299.1179, found: 299.1177.

**3-((4-chlorophenyl)ethynyl)pyrrolo[1,2-*a*]quinoxaline [5m]**

Light yellow solid (44.8 mg, 74%); mp 226-227 °C. <sup>1</sup>H NMR (400 MHz, CDCl<sub>3</sub>) δ 9.00 (s, 1H), 8.04 – 7.99 (m, 1H), 7.85 (dd, *J* = 6.2, 1.9 Hz, 2H), 7.56 (dd, *J* = 8.2, 1.5 Hz, 1H), 7.53 – 7.47 (m, 3H), 7.36 (d, *J* = 2.0 Hz, 1H), 7.34 (d, *J* = 2.0 Hz, 1H), 7.02 (d, *J* = 2.8 Hz, 1H); <sup>13</sup>C NMR (101 MHz, CDCl<sub>3</sub>) δ 144.4, 136.3, 134.1, 132.6, 130.3, 128.8, 128.4, 127.7, 127.6, 125.9, 121.9, 117.1, 114.1, 113.9, 102.5, 91.5, 83.1; HRMS (APCI): *m/z* calcd for C<sub>19</sub>H<sub>11</sub>ClN<sub>2</sub> [M+H]<sup>+</sup>: 303.0684, found: 303.0682.

***2-methyl-4-(pyrrolo[1,2-a]quinoxalin-3-yl)but-3-yn-2-ol [5n]***

Brown liquid (46.1 mg, 92%); <sup>1</sup>H NMR (400 MHz, CDCl<sub>3</sub>) δ 8.85 (s, 1H), 7.97 (dd, *J* = 8.0, 1.4 Hz, 1H), 7.71 (dd, *J* = 8.7, 1.8 Hz, 2H), 7.46 (s, 1H), 7.40 (d, *J* = 6.7 Hz, 1H), 6.83 (d, *J* = 2.8 Hz, 1H), 1.69 (s, 6H); <sup>13</sup>C NMR (101 MHz, CDCl<sub>3</sub>) δ 144.3, 136.0, 130.1, 130.1, 128.3, 127.5, 125.7, 117.2, 113.80, 113.76, 102.6, 97.5, 74.4, 65.6, 31.7; HRMS (APCI): *m/z* calcd for C<sub>16</sub>H<sub>14</sub>N<sub>2</sub>O [M+H]<sup>+</sup>: 251.1179, found: 251.1176.

### 3. NMR spectra of the products

#### 3-iodopyrrolo[1,2-a]quinoxaline [3a]

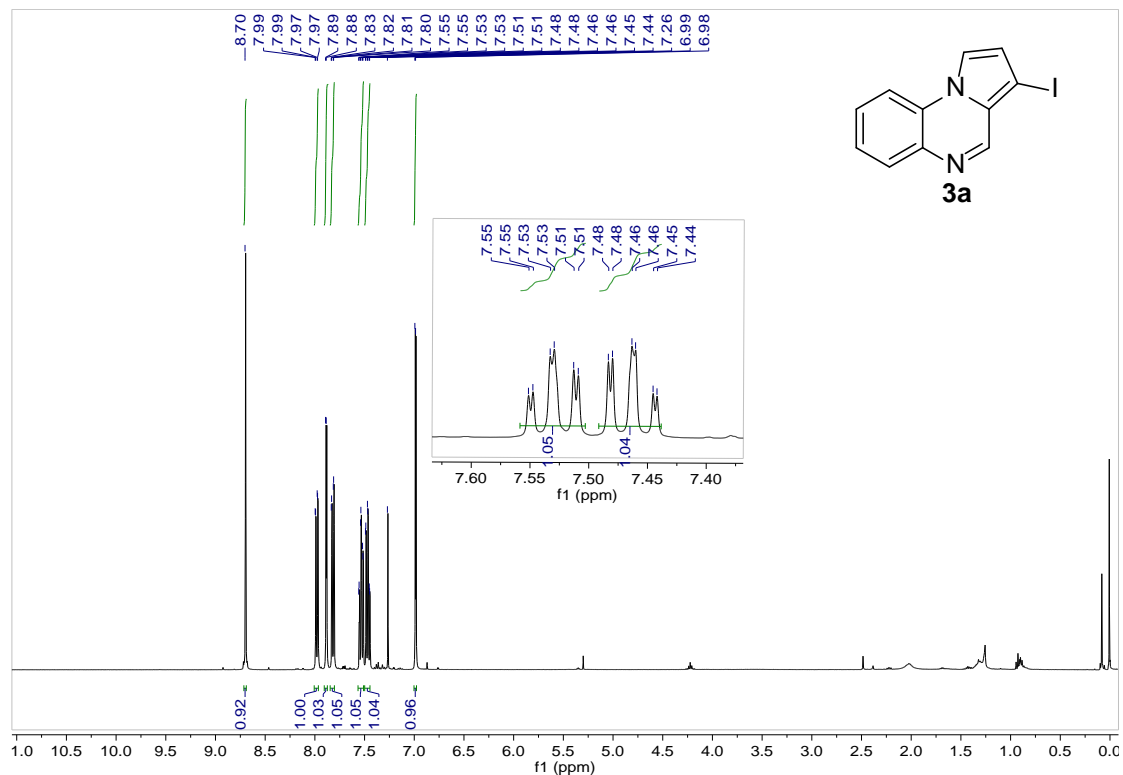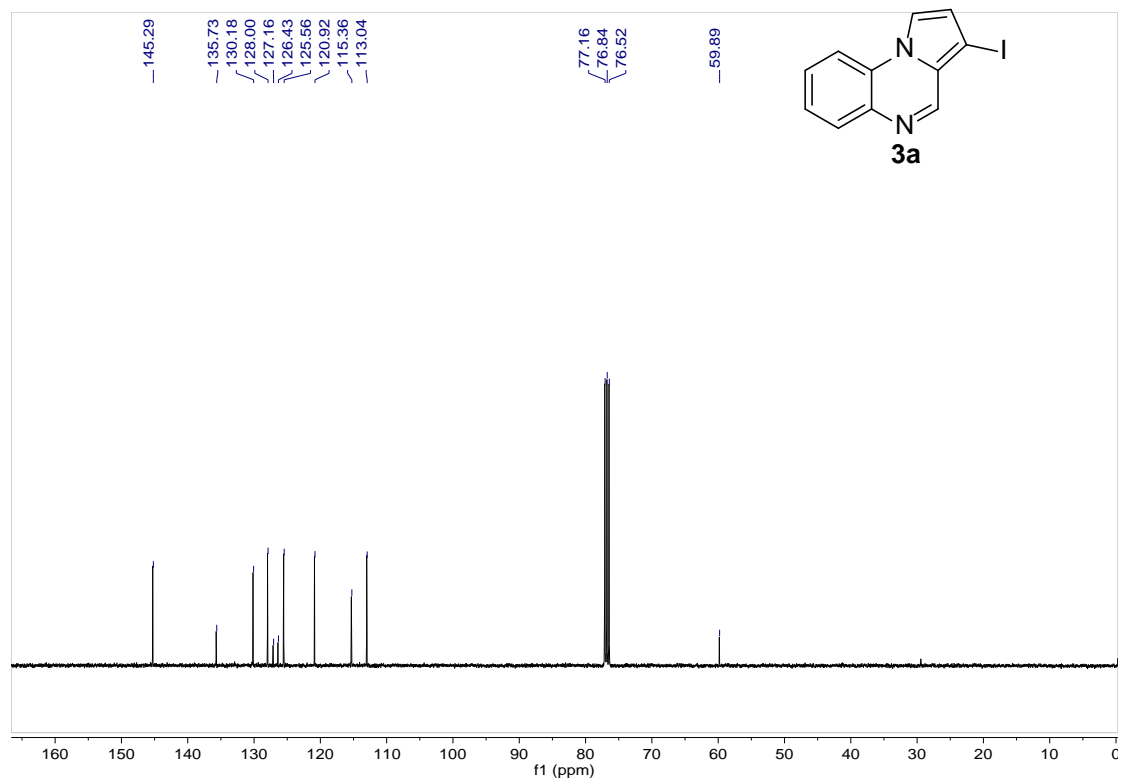

8-fluoro-3-iodopyrrolo[1,2-a]quinoxaline [3b]

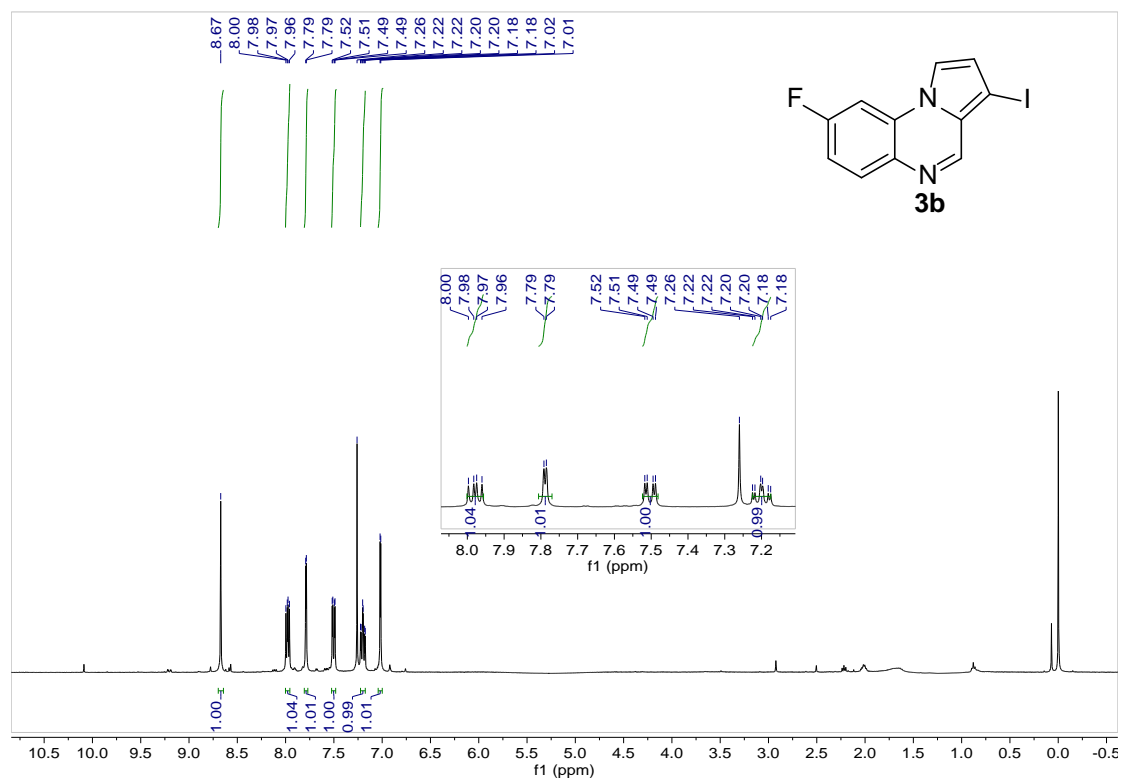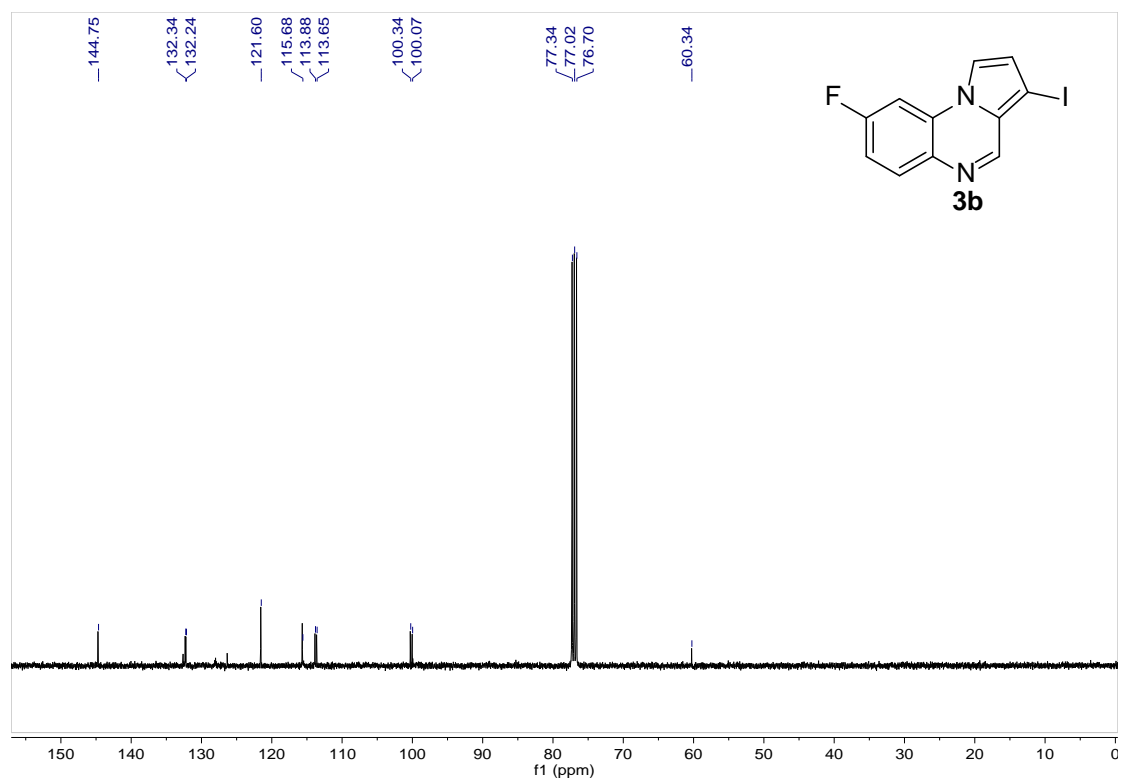

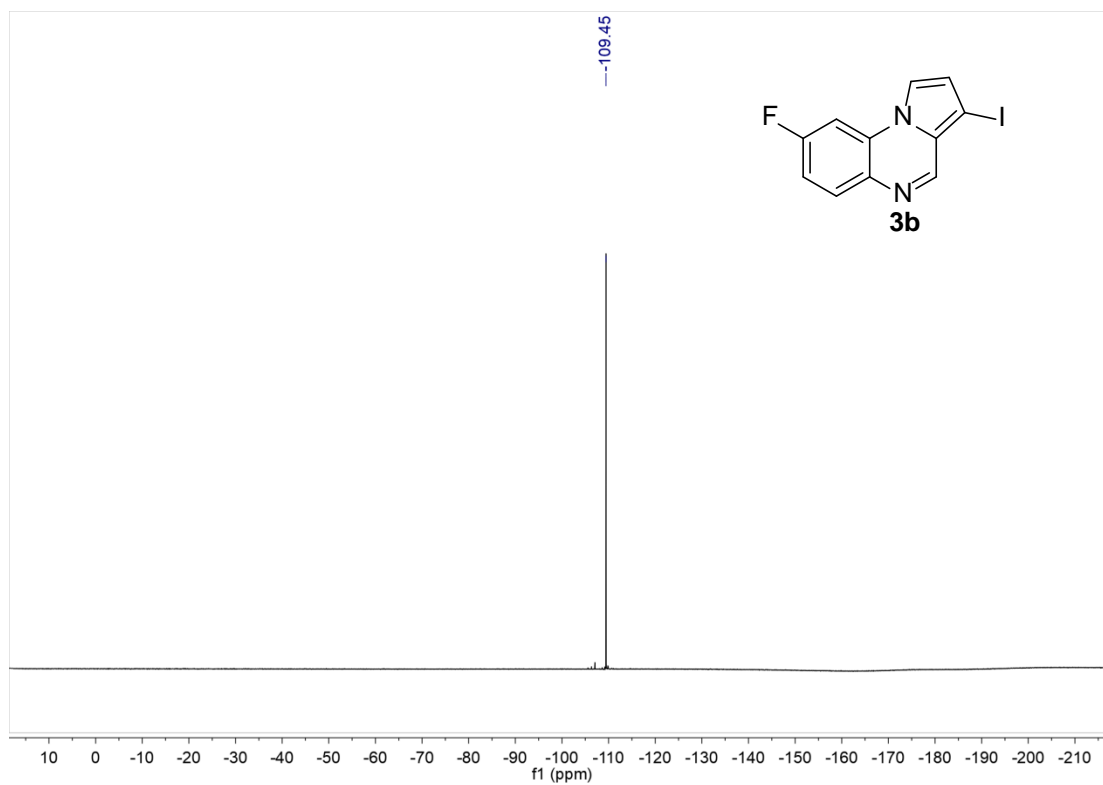

*3-iodo-8-methylpyrrolo[1,2-a]quinoxaline [3c]*

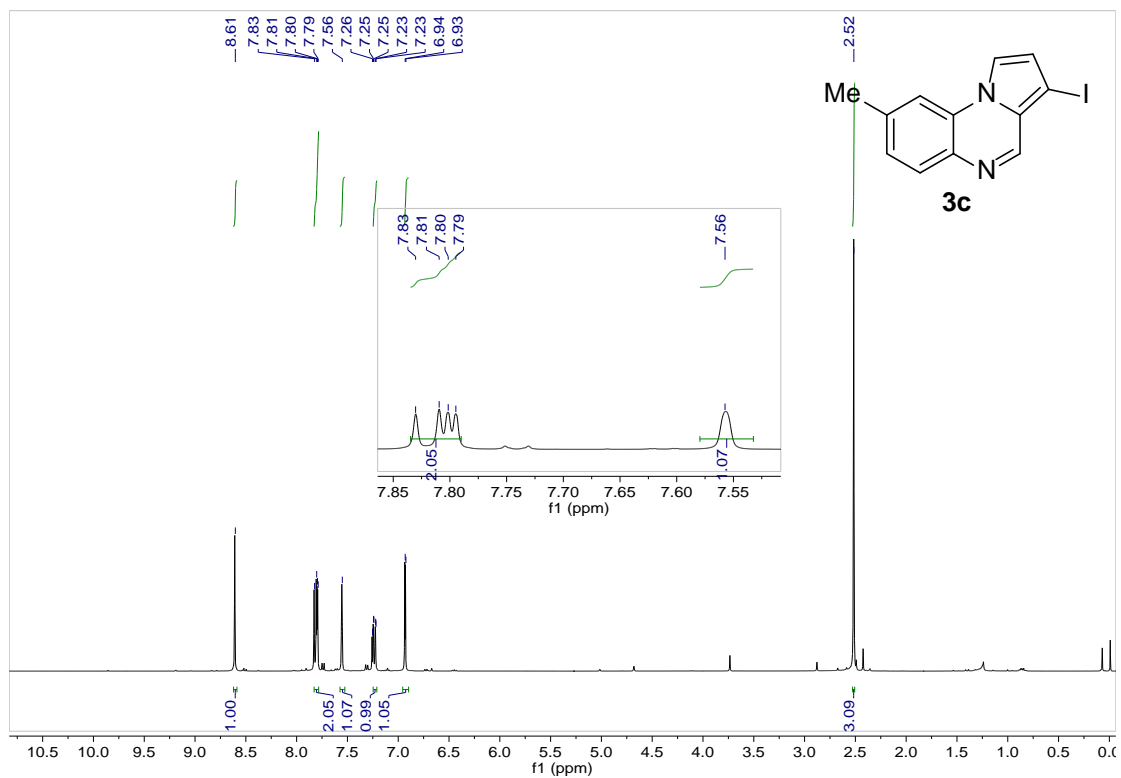

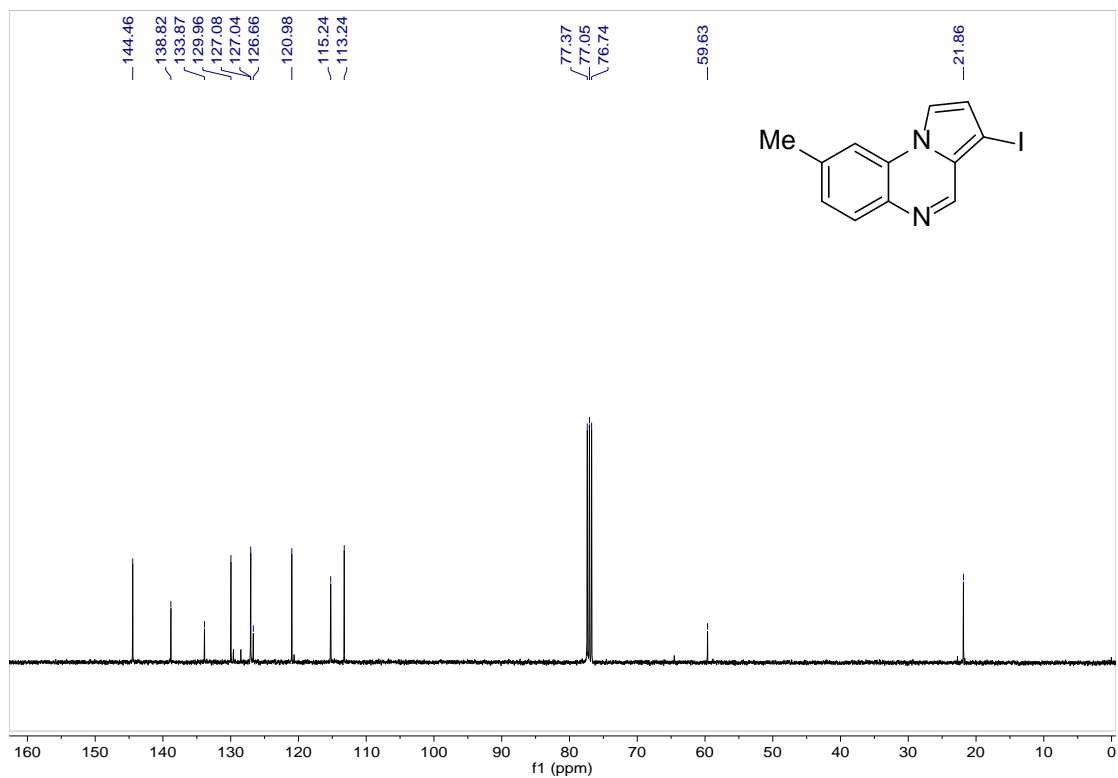

*3-iodo-7-methylpyrrolo[1,2-a]quinoxaline [3d]*

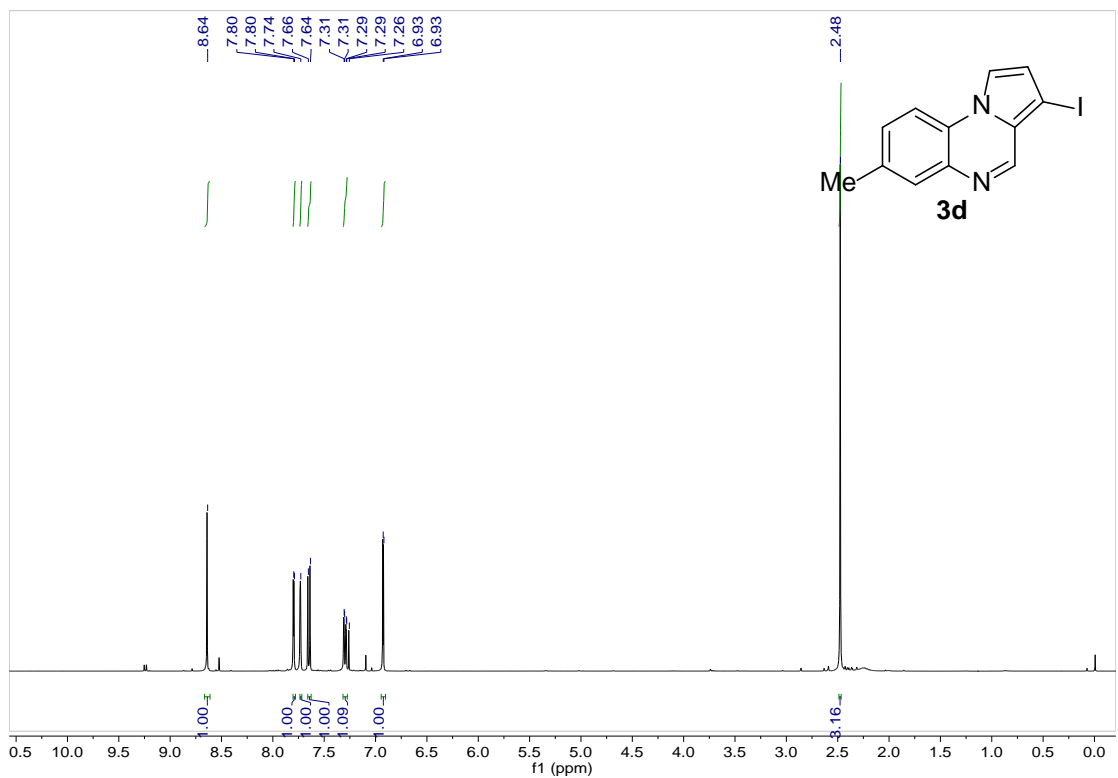



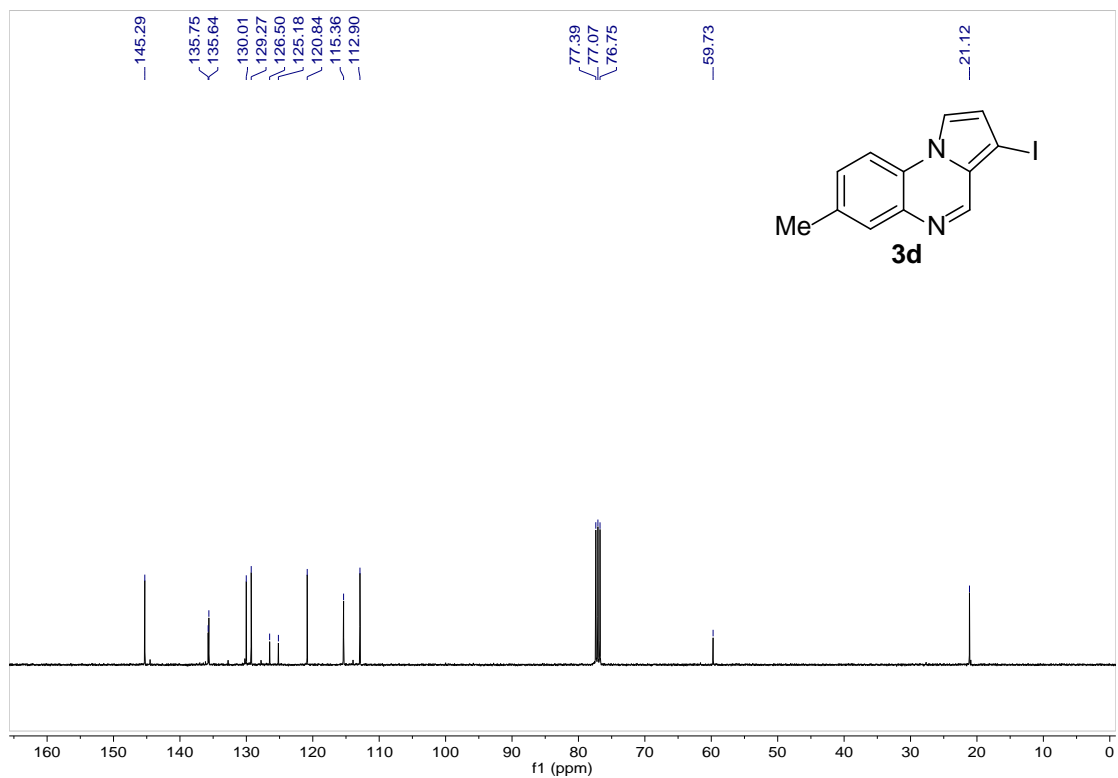

*3-iodo-4-phenylpyrrolo[1,2-a]quinoxaline [3e]*

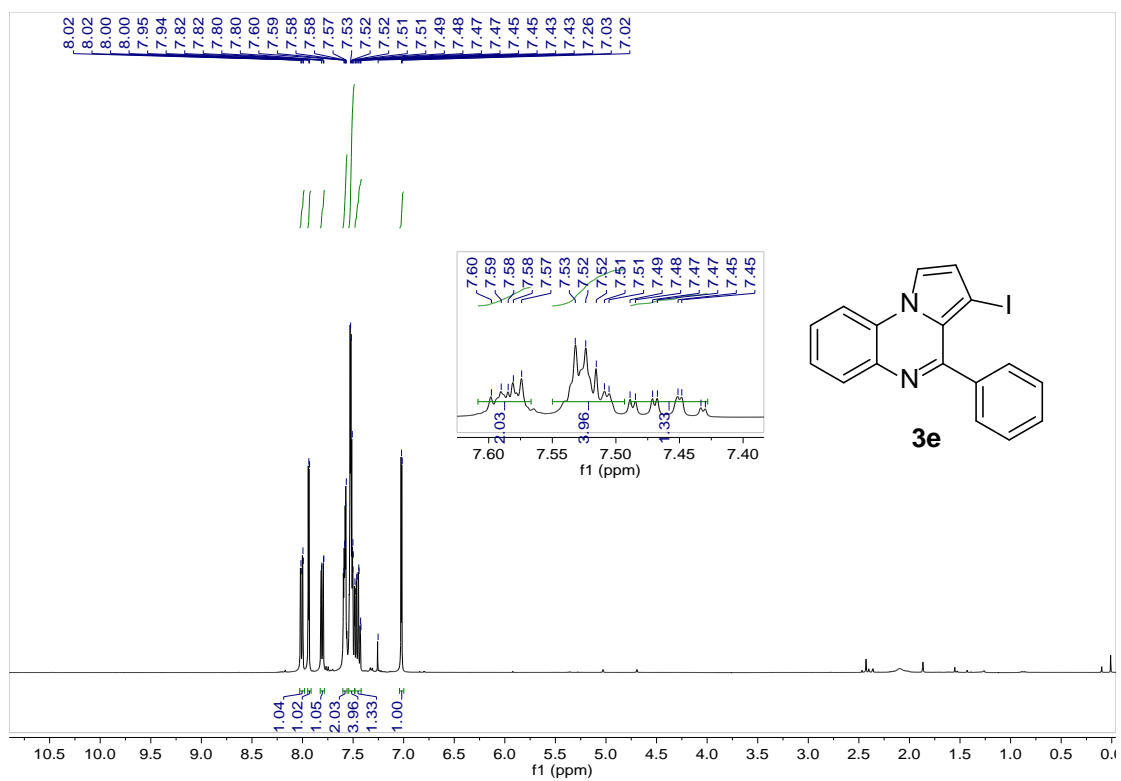

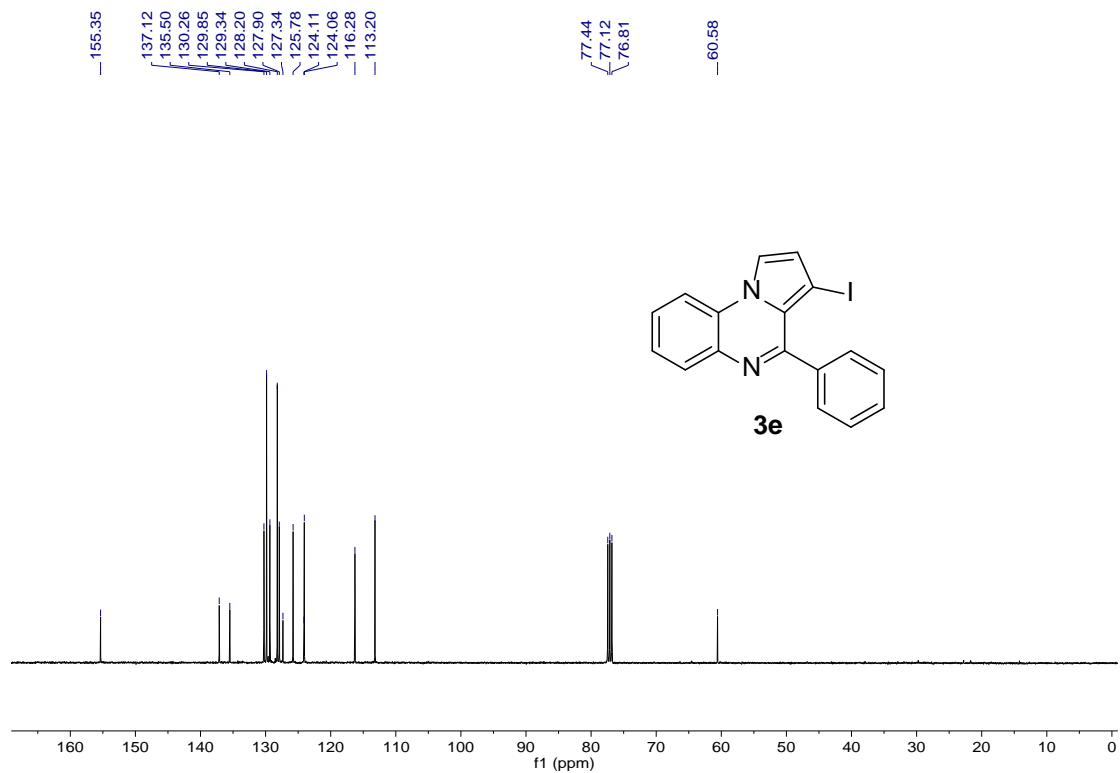

**3-iodo-4-(p-tolyl)pyrrolo[1,2-a]quinoxaline [3f]**

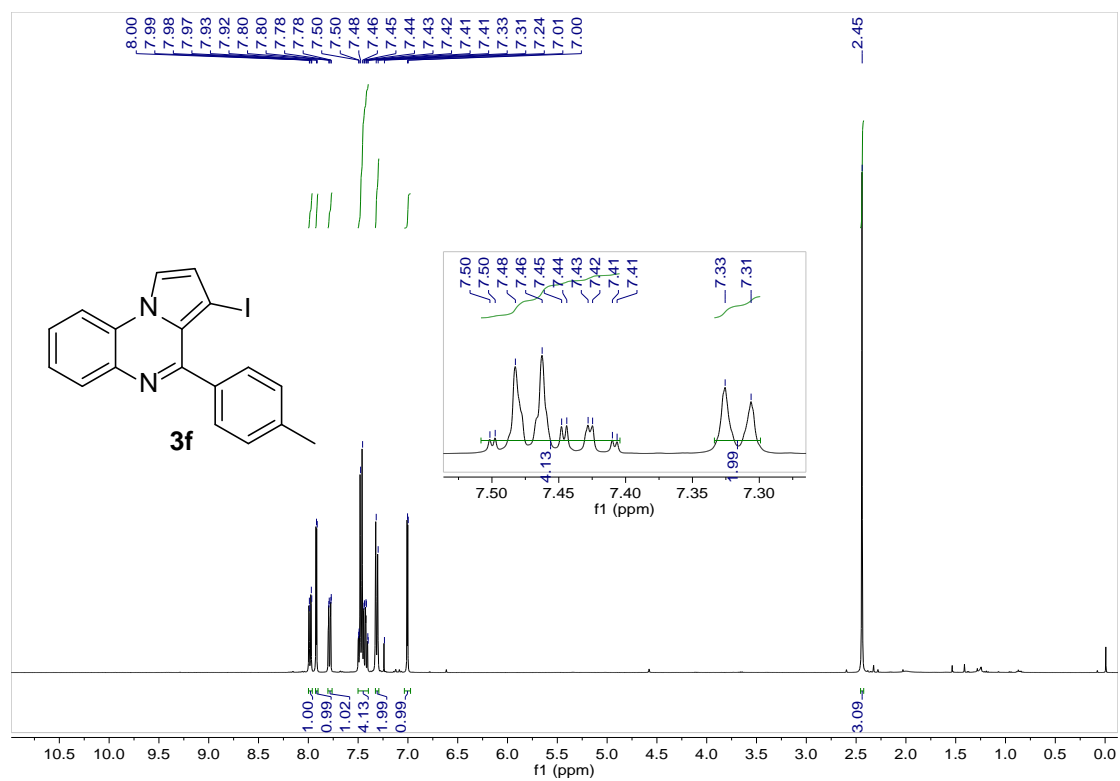

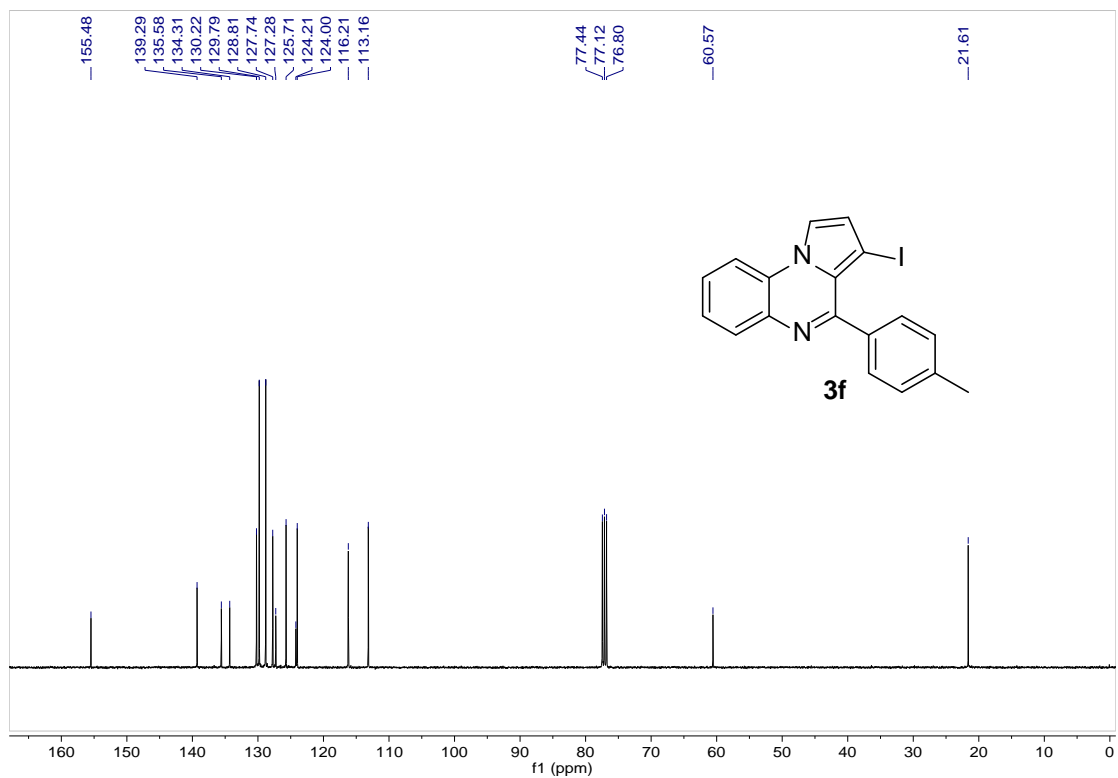

*3-iodo-4-(4-nitrophenyl)pyrrolo[1,2-a]quinoxaline [3g]*

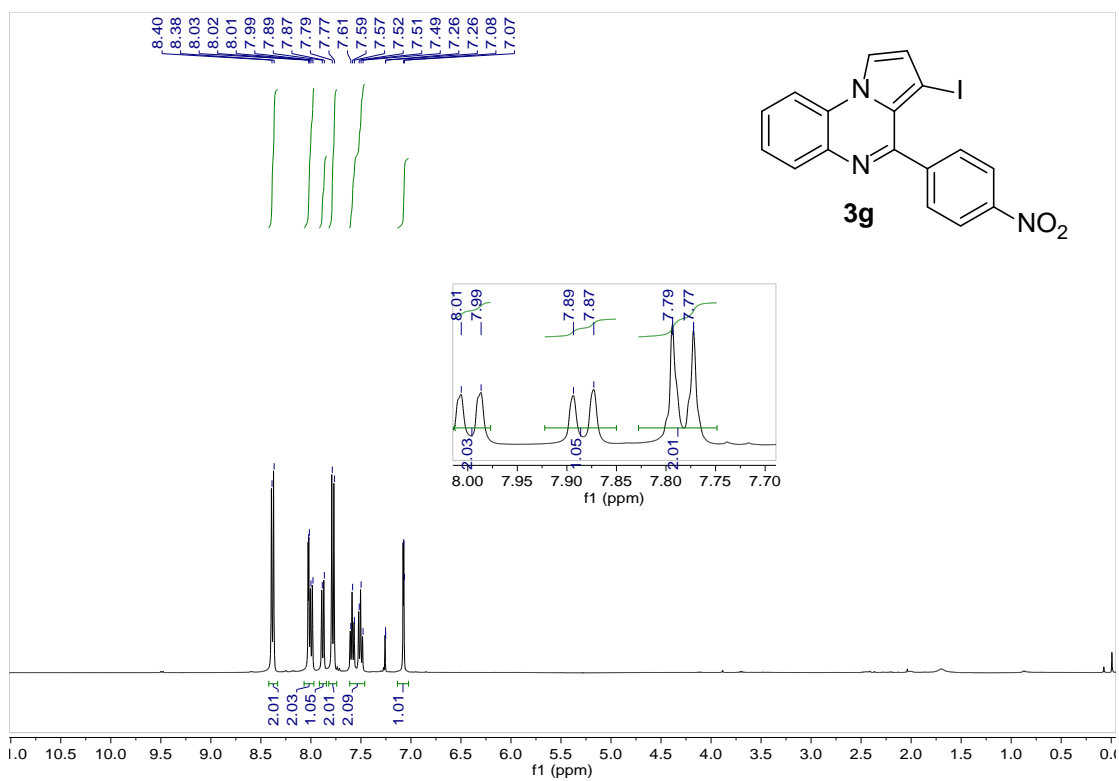

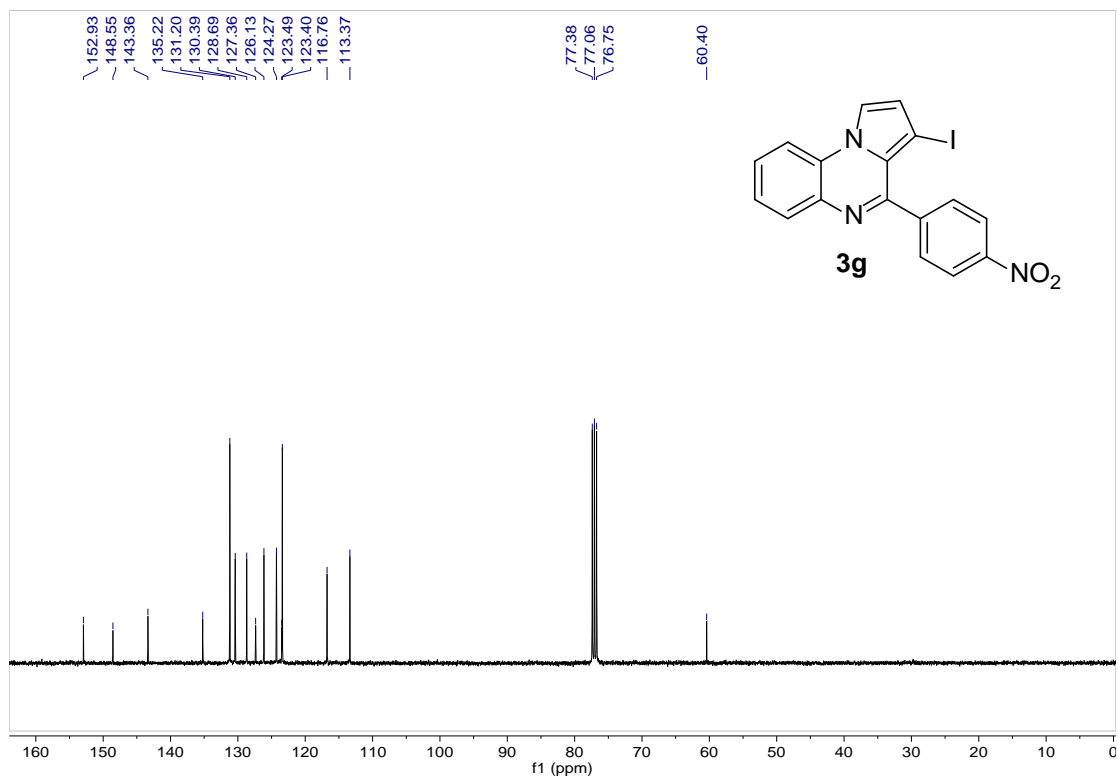

*4-(4-fluorophenyl)-3-iodopyrrolo[1,2-a]quinoxaline [3h]*

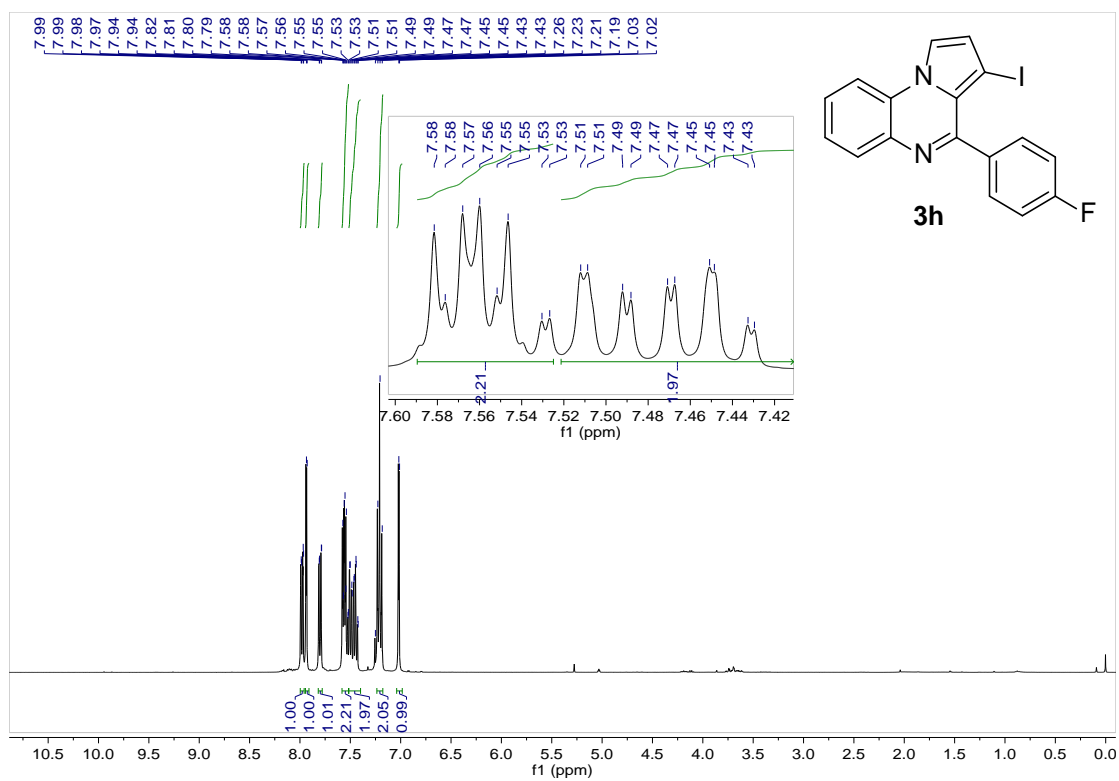

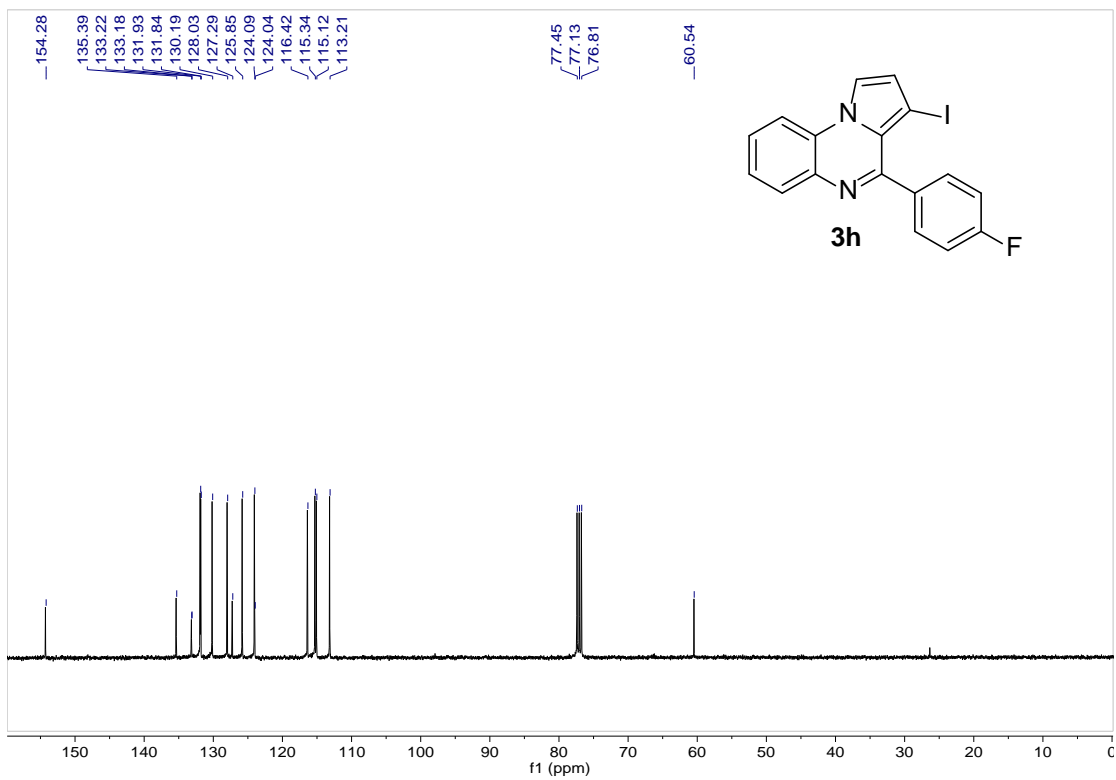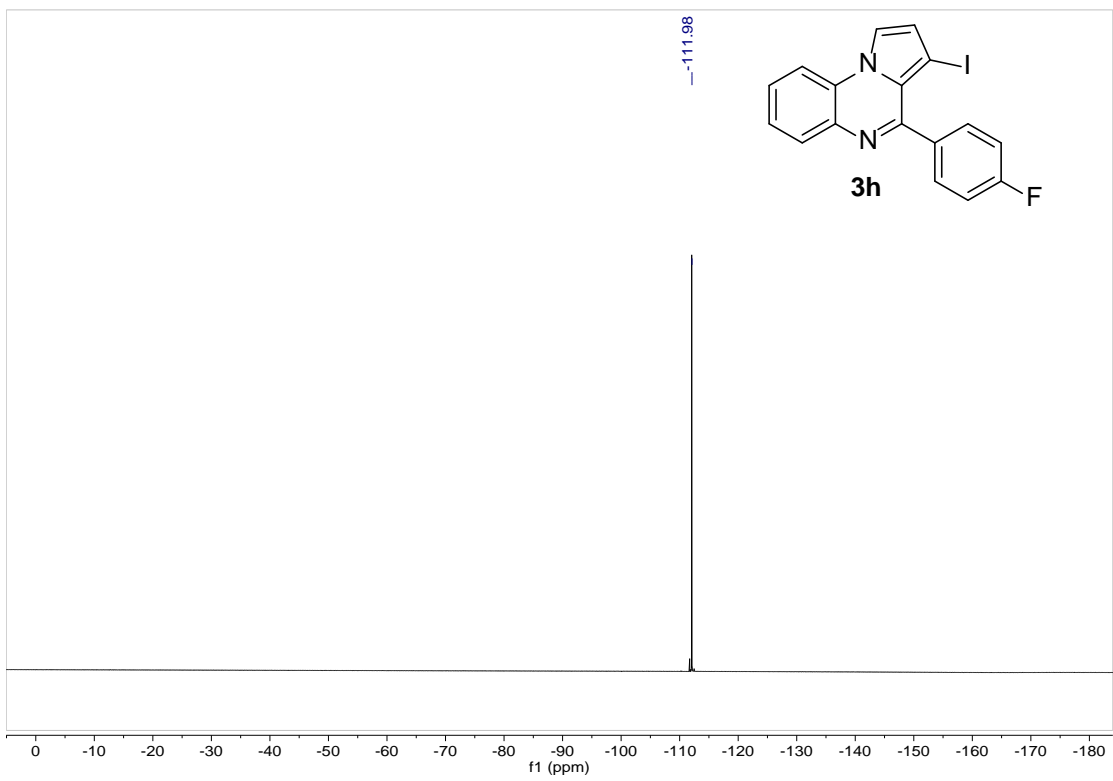

3-iodo-4-(4-methoxyphenyl)pyrrolo[1,2-a]quinoxaline [**3i**]

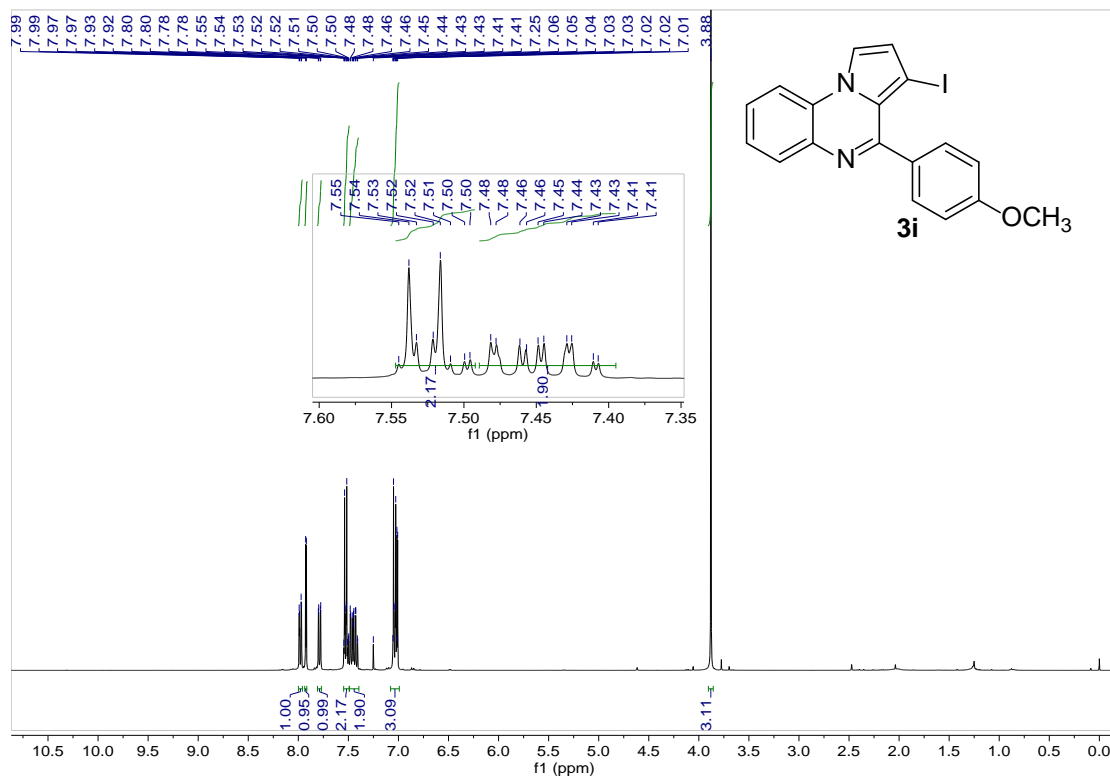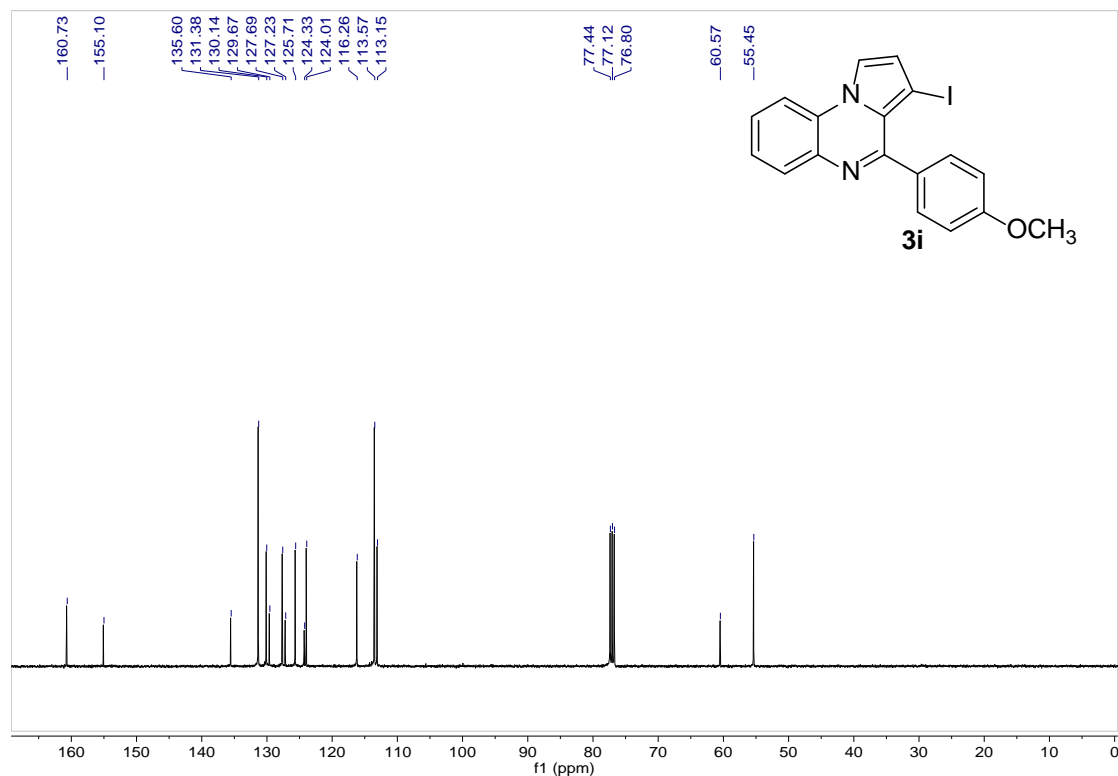

4-(4-chlorophenyl)-3-iodopyrrolo[1,2-a]quinoxaline [3j]

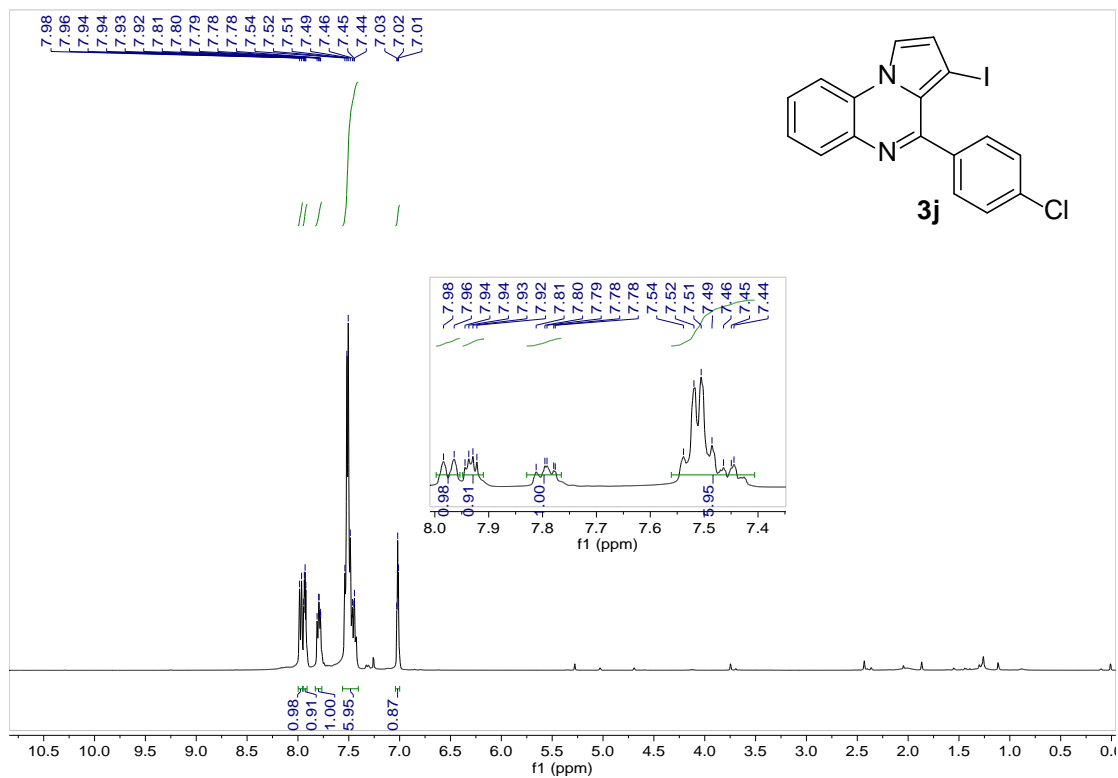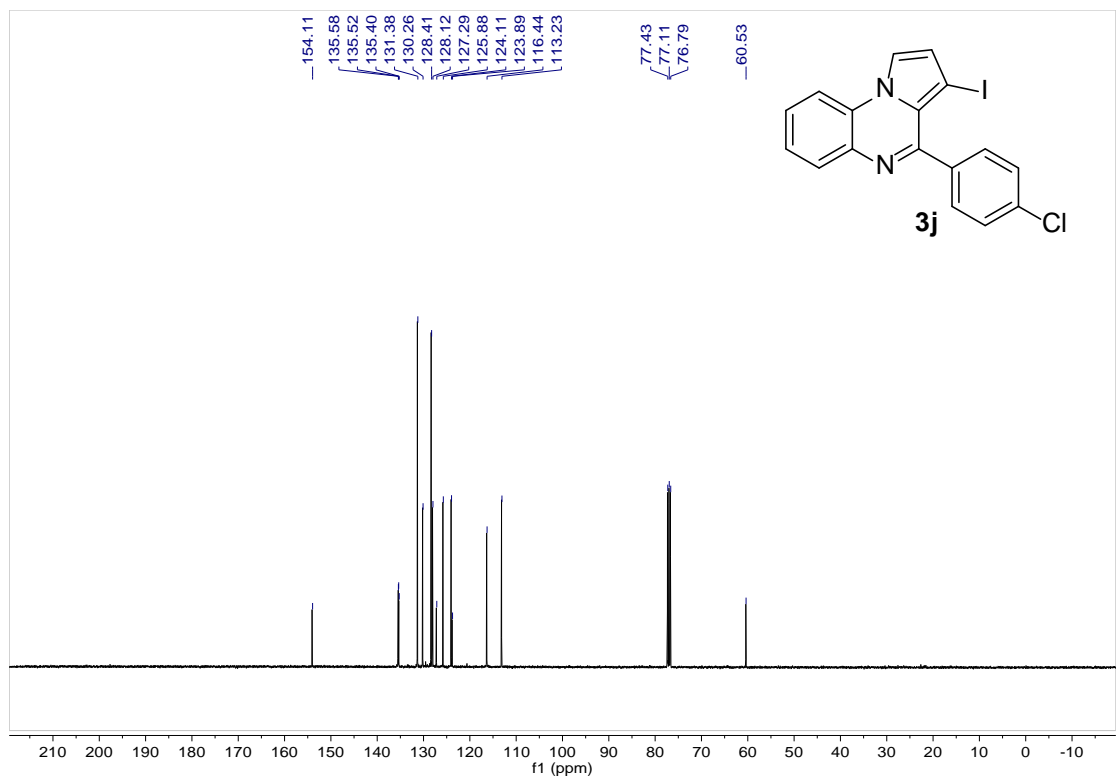

4-(4-bromophenyl)-3-iodopyrrolo[1,2-a]quinoxaline [3k]

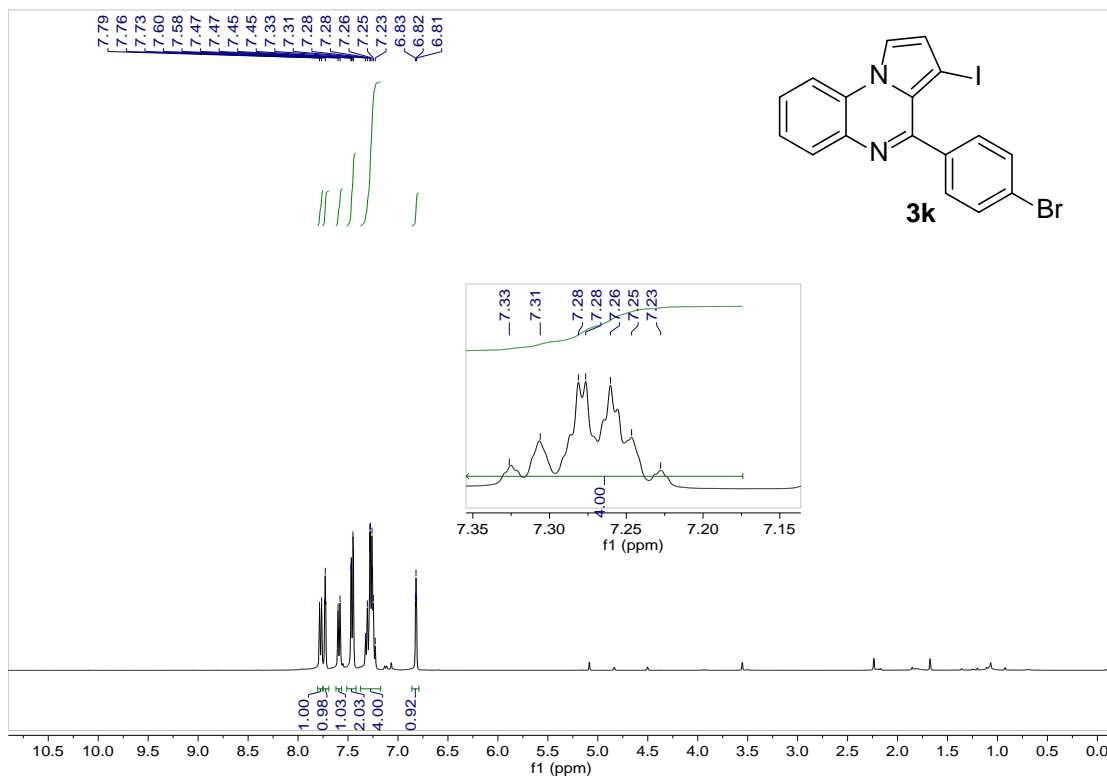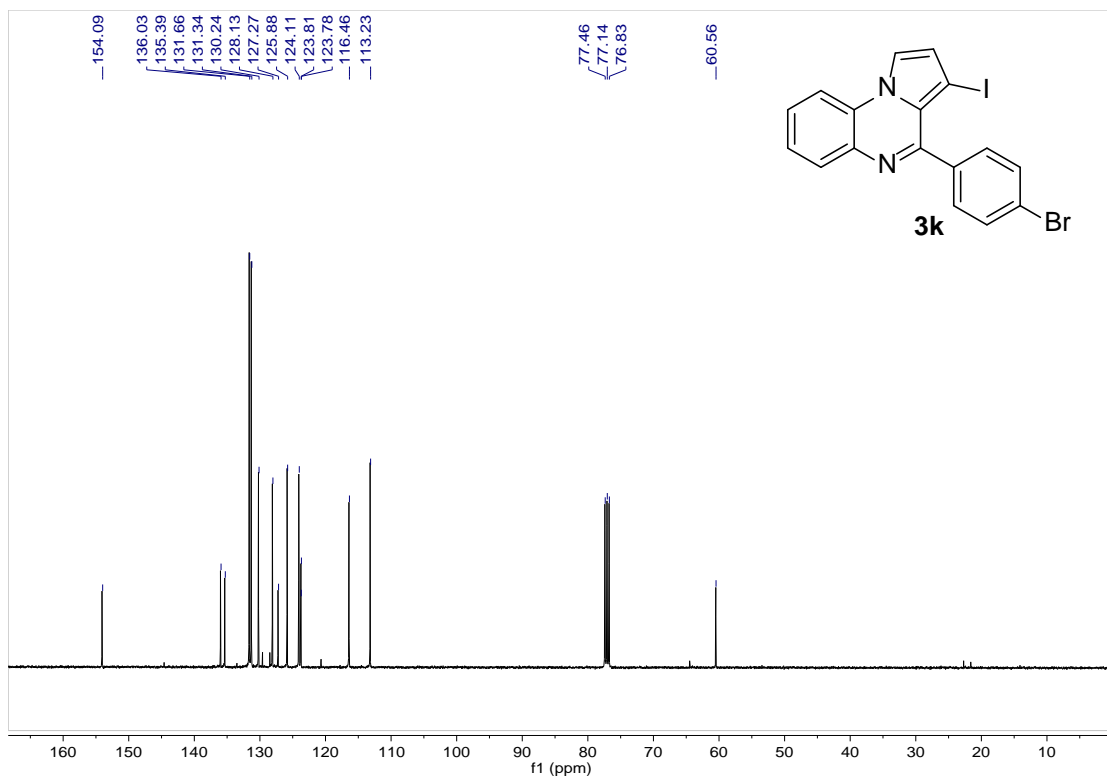



4-(3-iodopyrrolo[1,2-a]quinoxalin-4-yl)benzonitrile [3I]

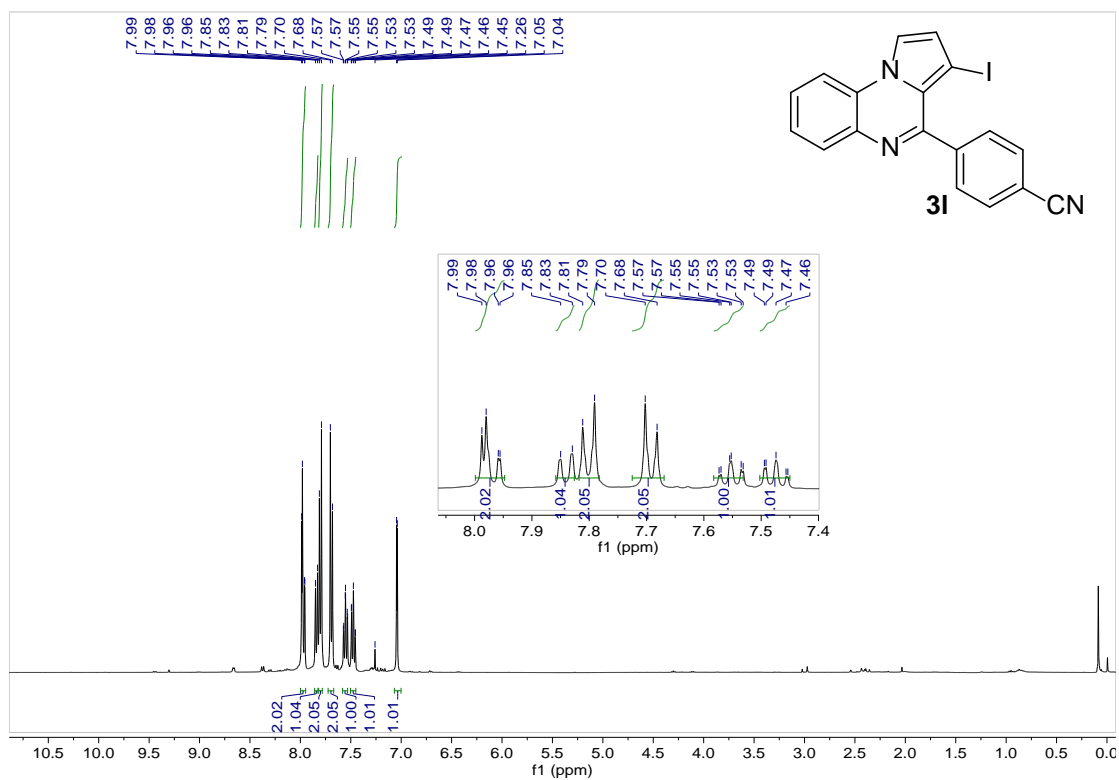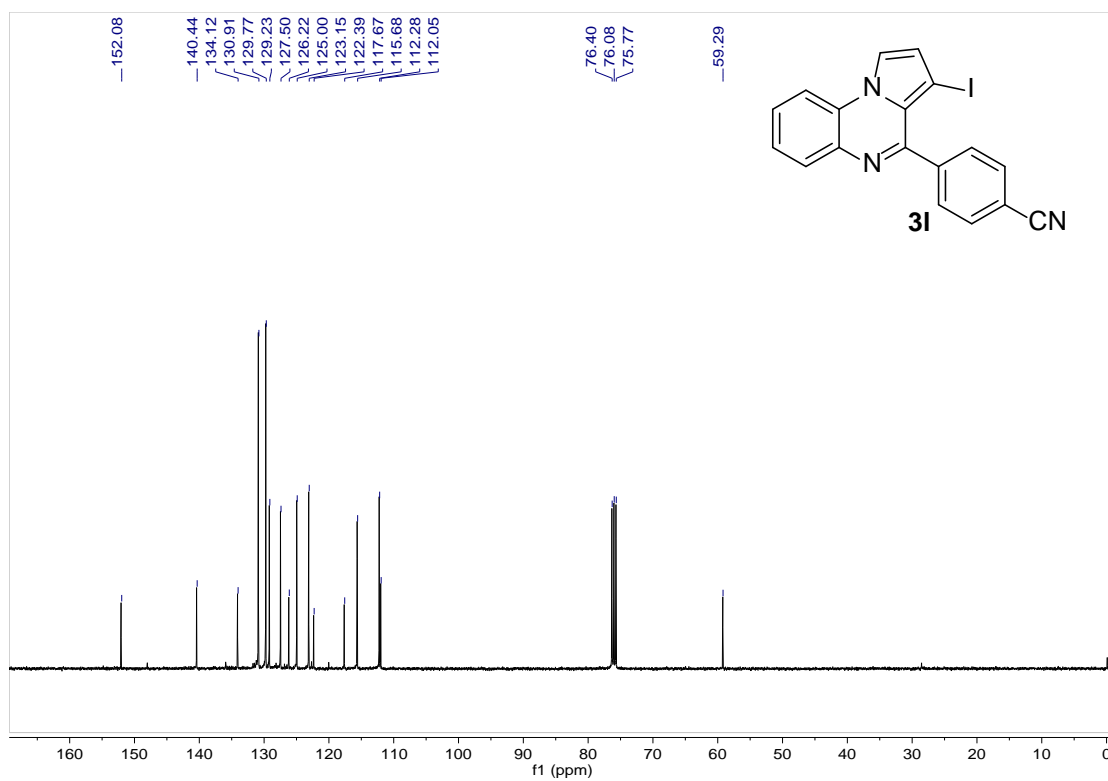

3-iodo-4-(4-methoxyphenyl)-7-methylpyrrolo[1,2-a]quinoxaline [3m]

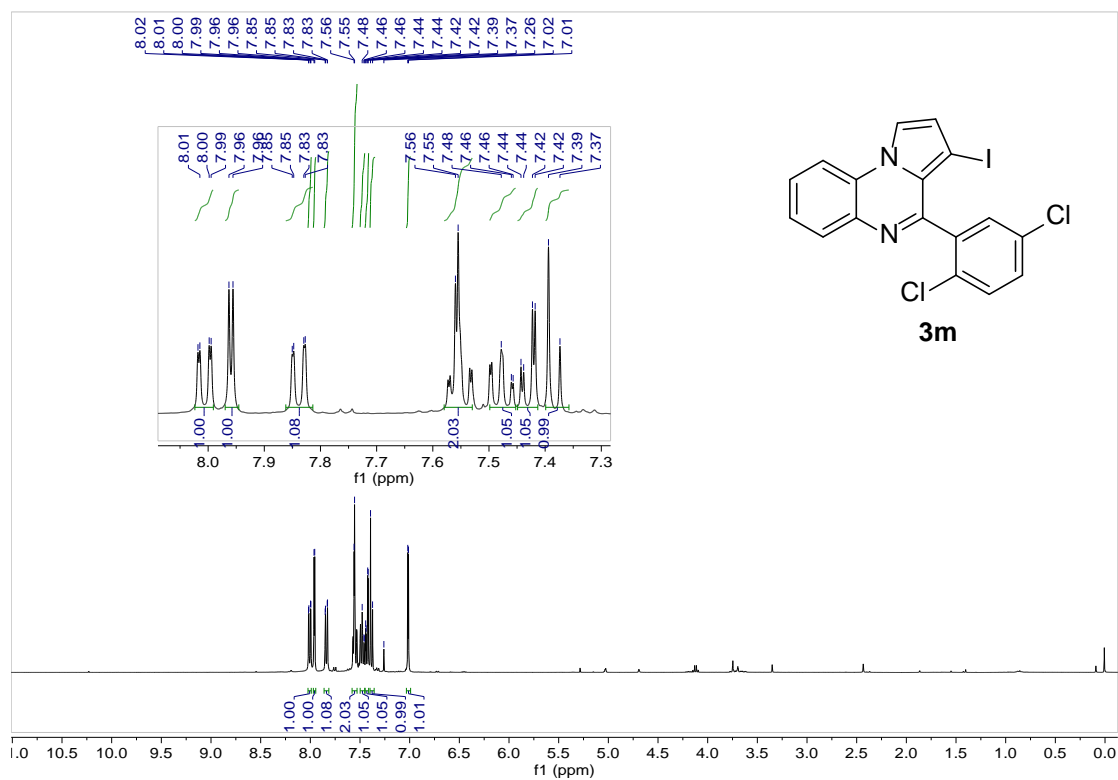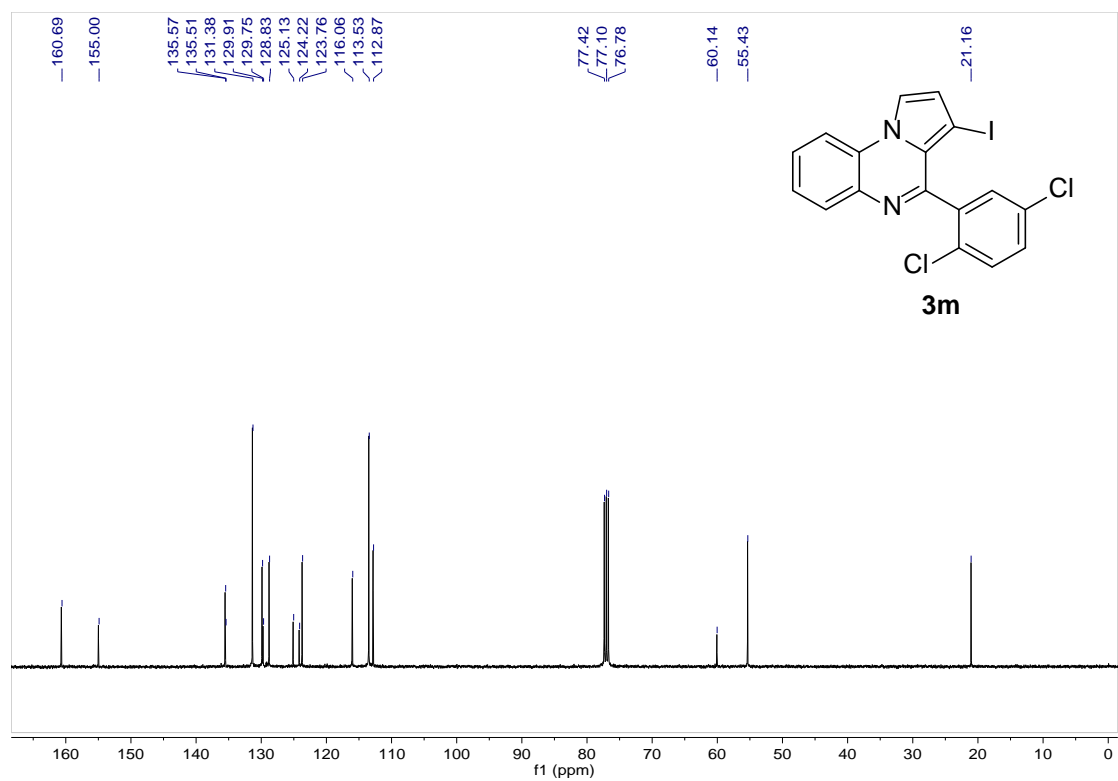

3-iodo-7-methyl-4-(4-nitrophenyl)pyrrolo[1,2-a]quinoxaline [3n]

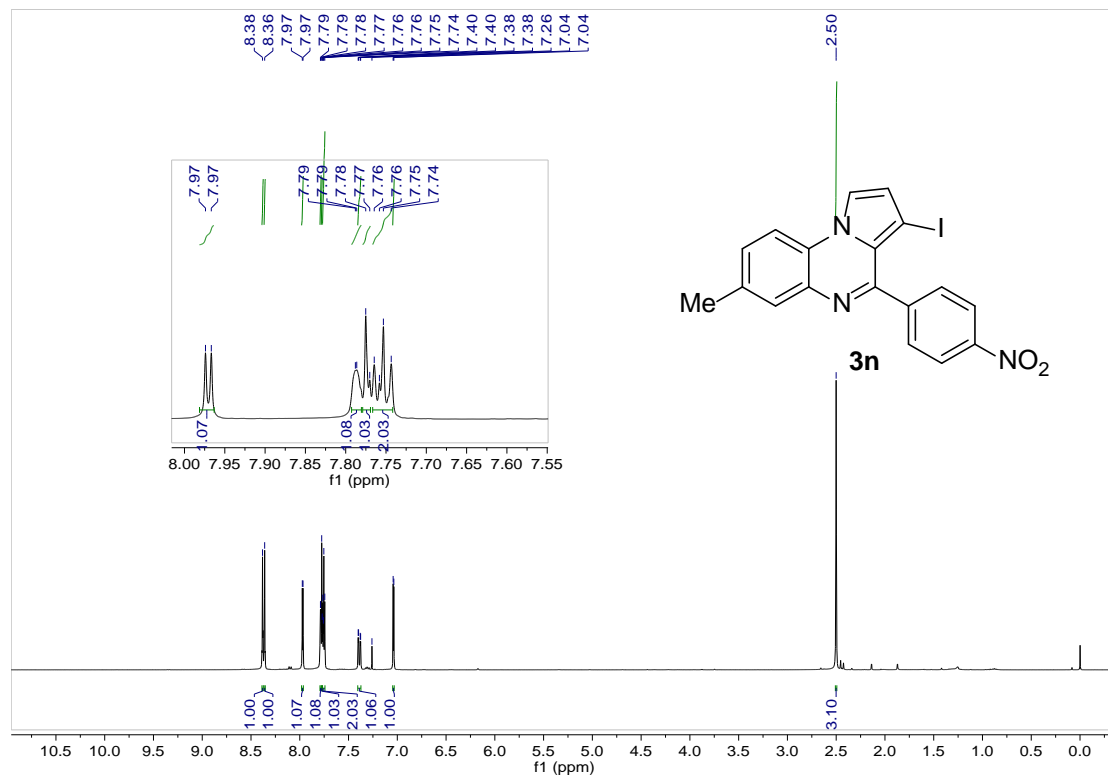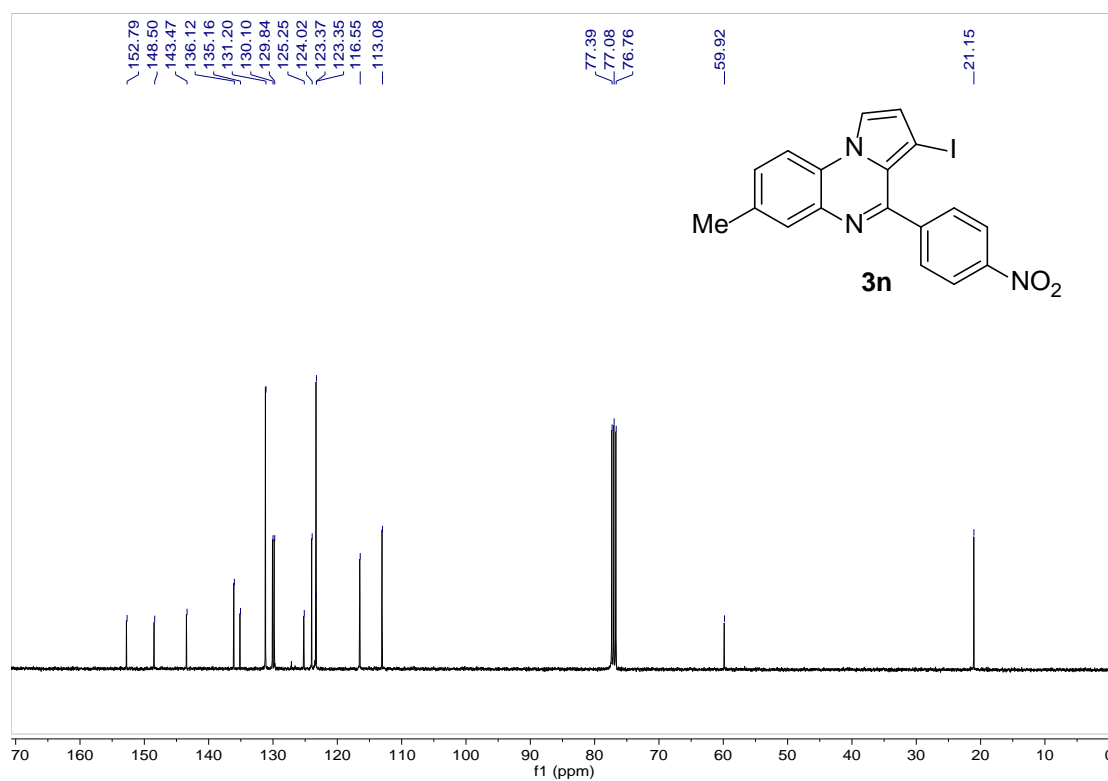

4-(2,4-dichlorophenyl)-3-iodopyrrolo[1,2-a]quinoxaline [3o]

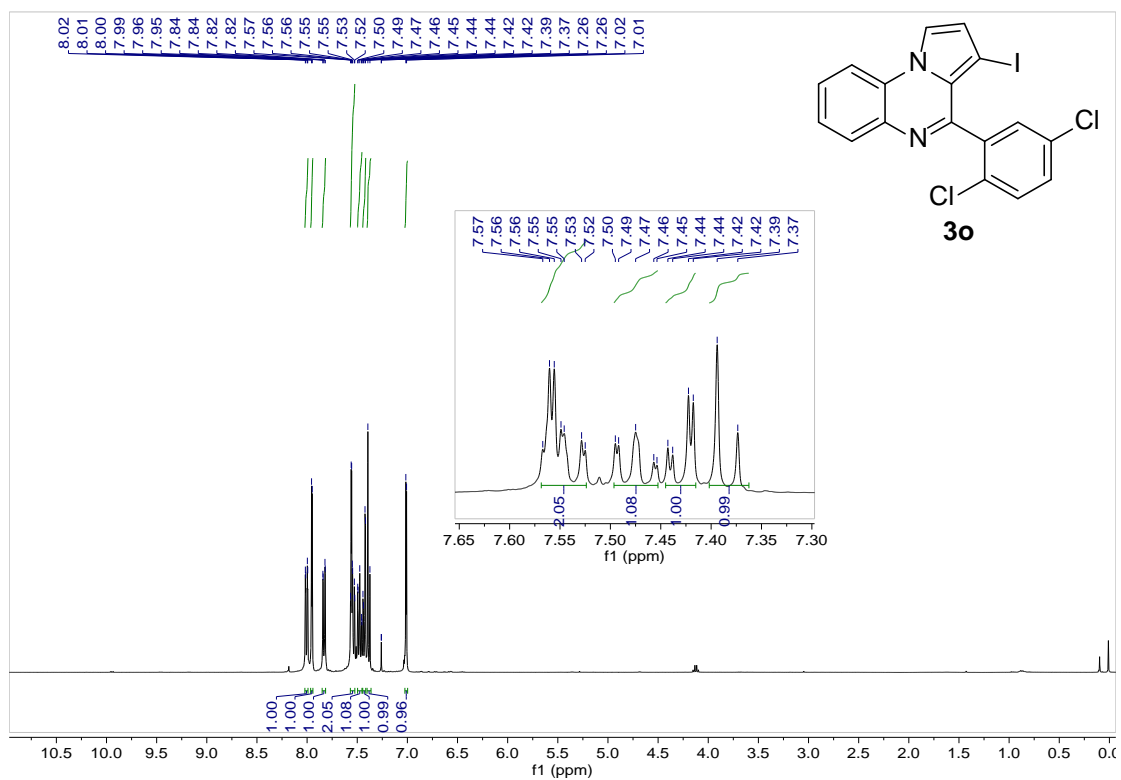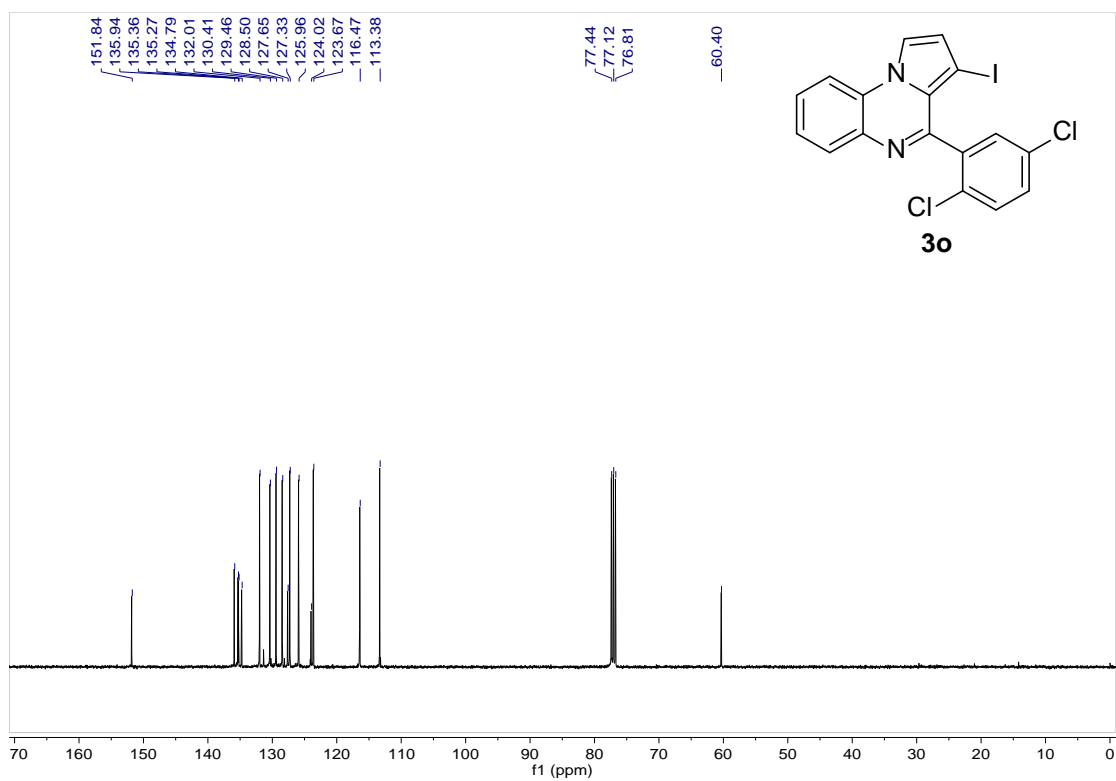

4-(furan-3-yl)-3-iodopyrrolo[1,2-a]quinoxaline [3p]

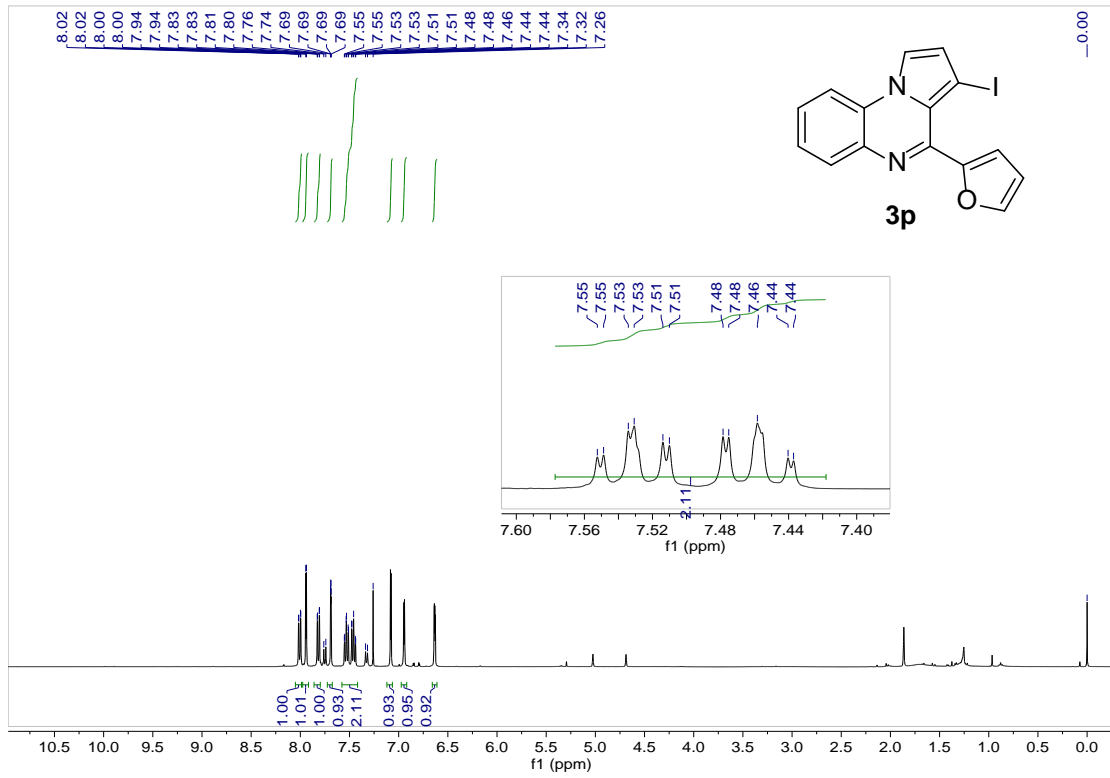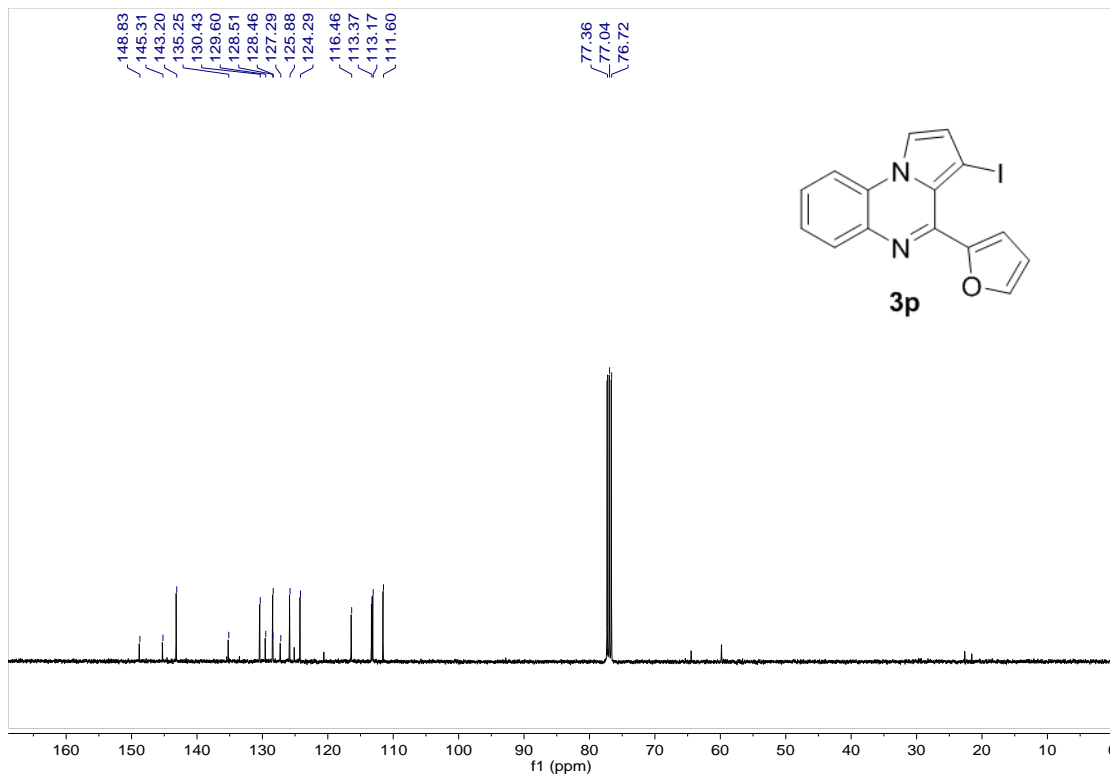

7-iodoindolo[1,2-a]quinoxaline [3q]

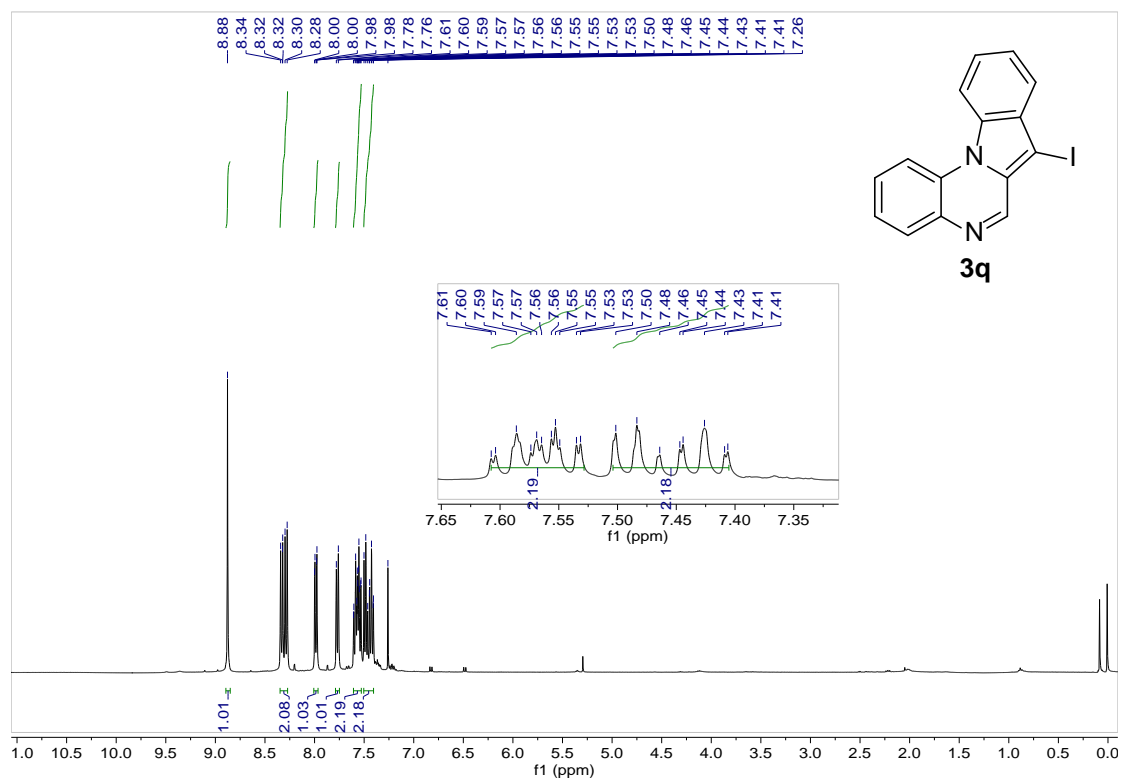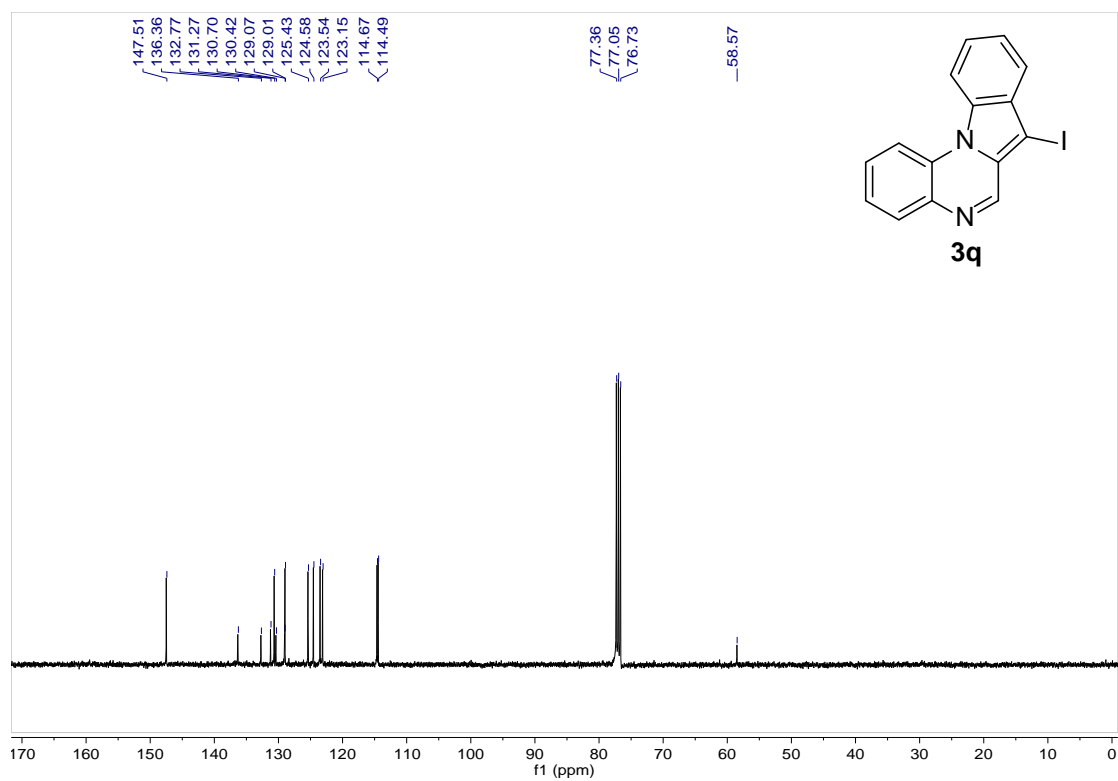

4-(furan-3-yl)-3-iodopyrrolo[1,2-a]quinoxaline [3q']

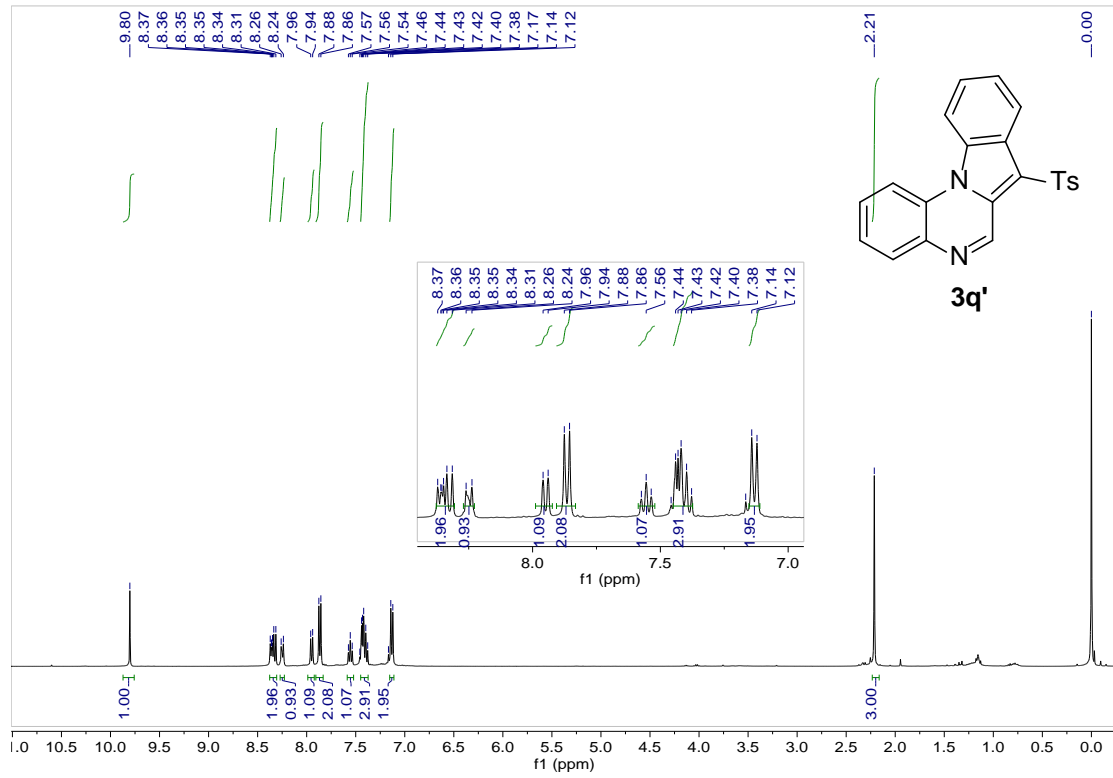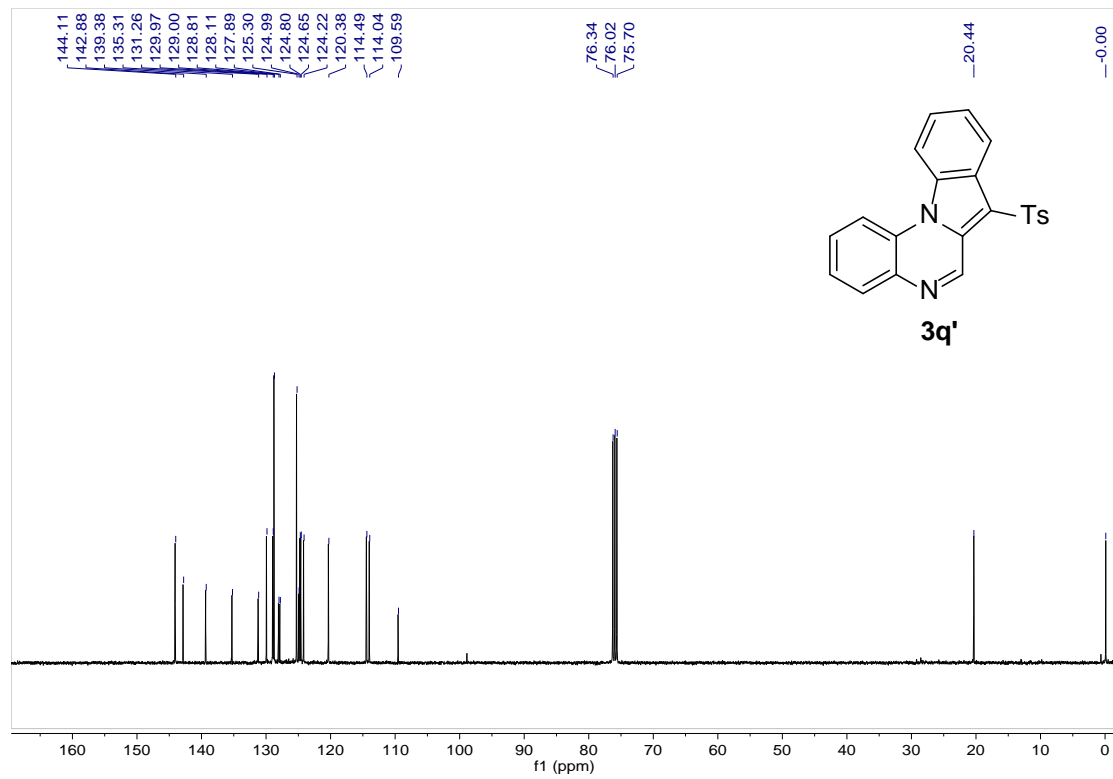

3-phenylpyrrolo[1,2-a]quinoxaline [5a]

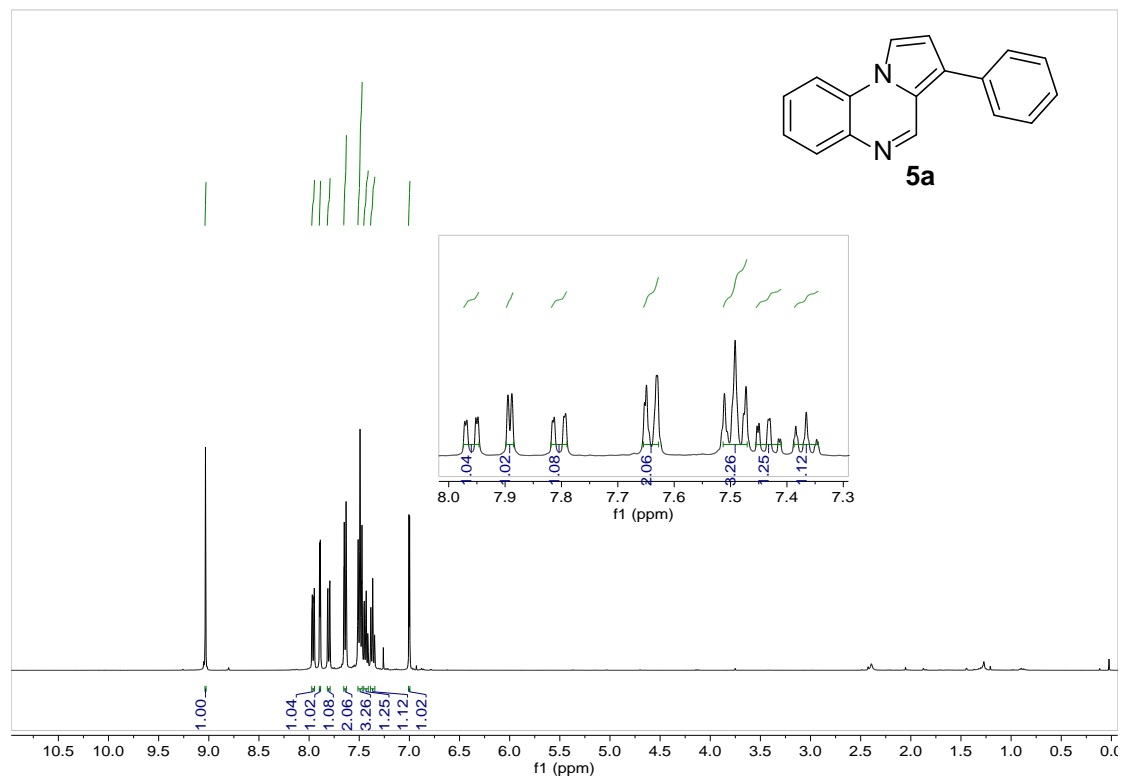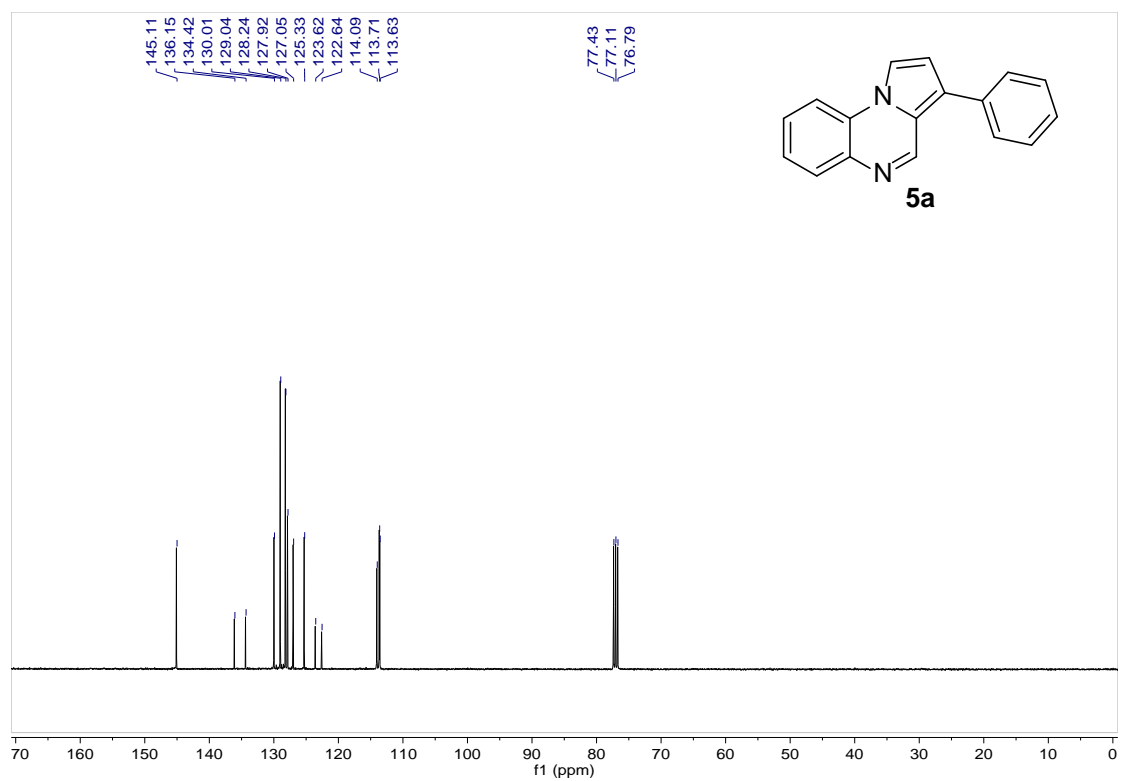



3-(p-tolyl)pyrrolo[1,2-a]quinoxaline [5b]

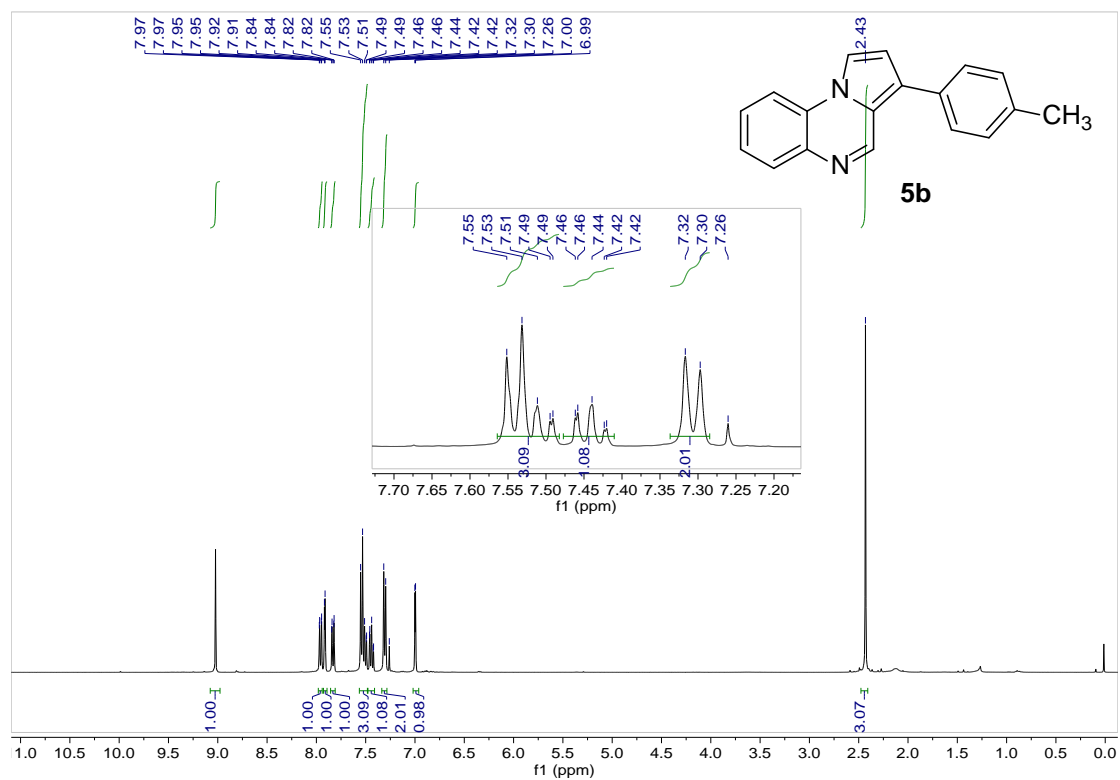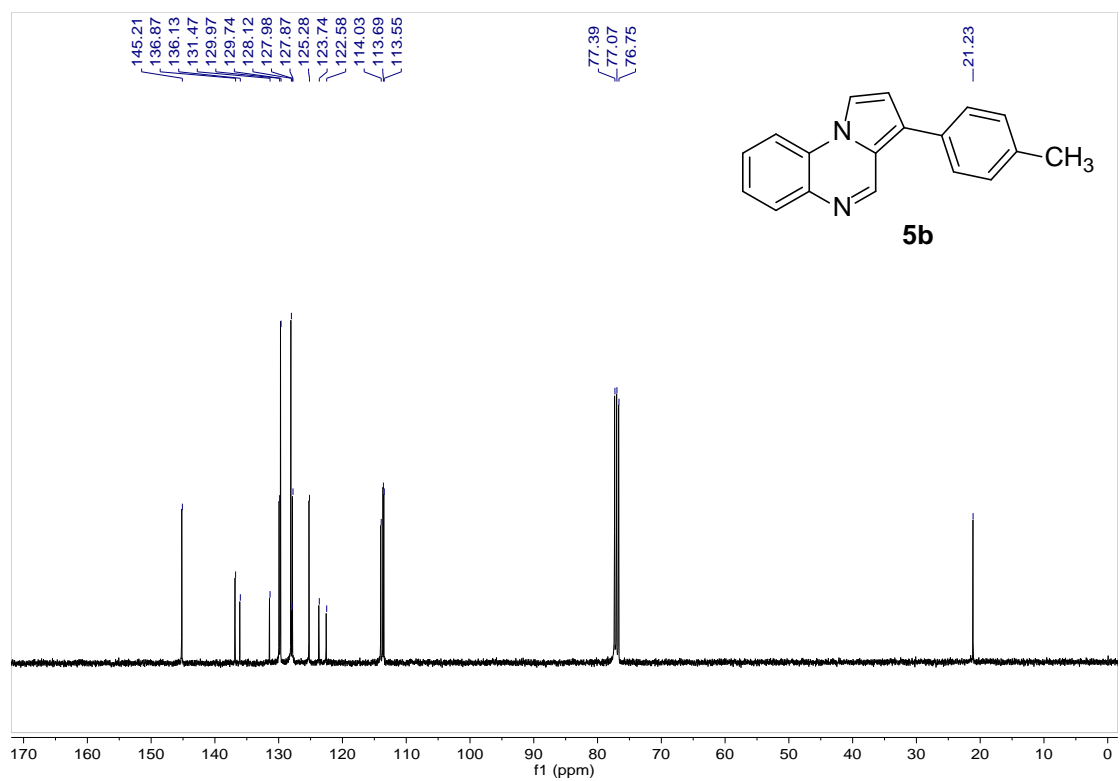

3-(4-methoxyphenyl)pyrrolo[1,2-a]quinoxaline [5c]

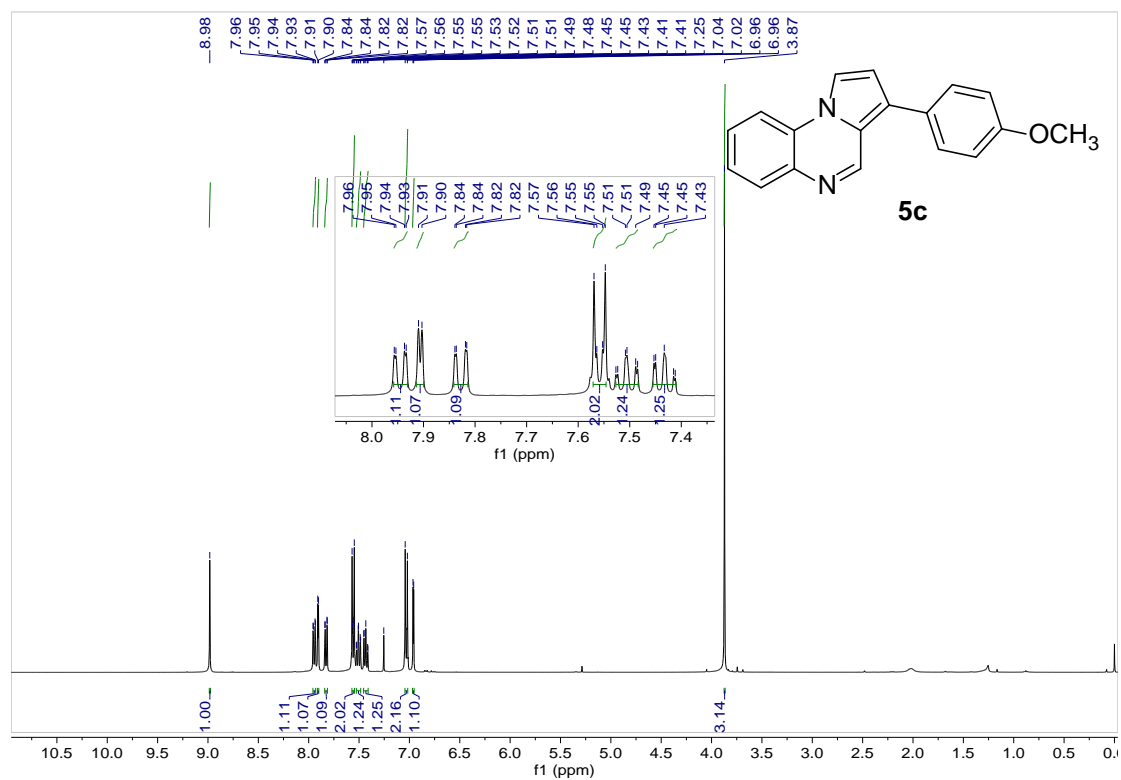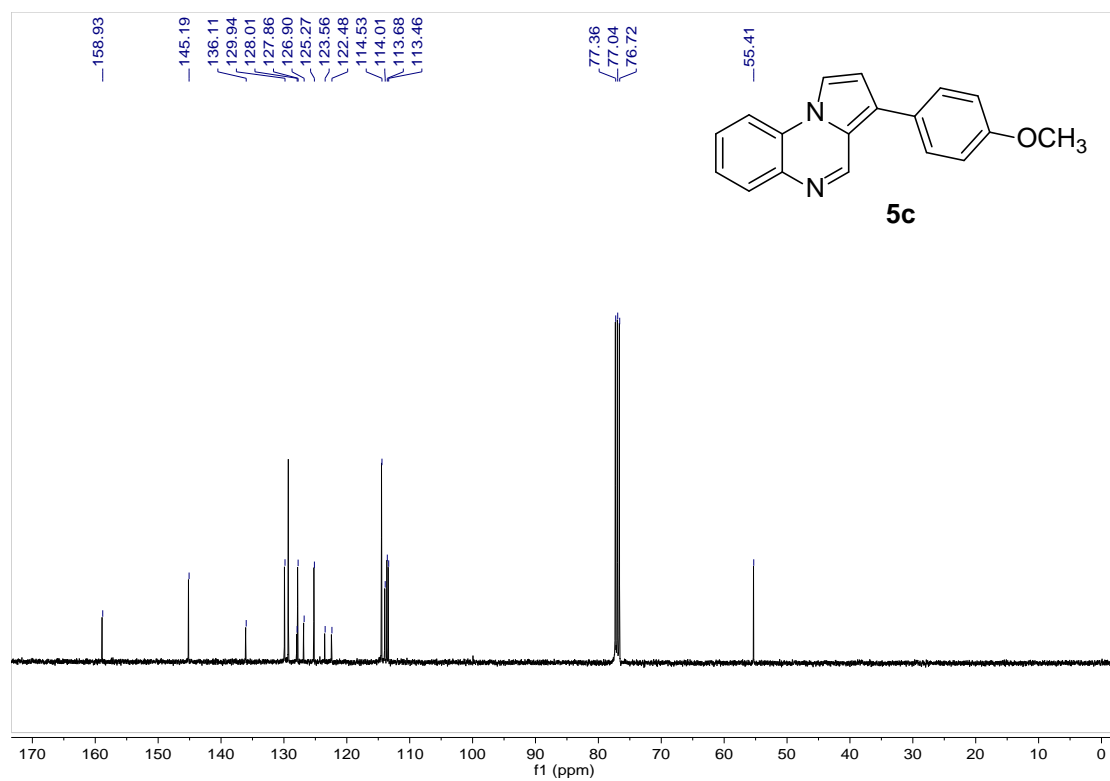

4-(pyrrolo[1,2-a]quinoxalin-3-yl)benzonitrile [5d]

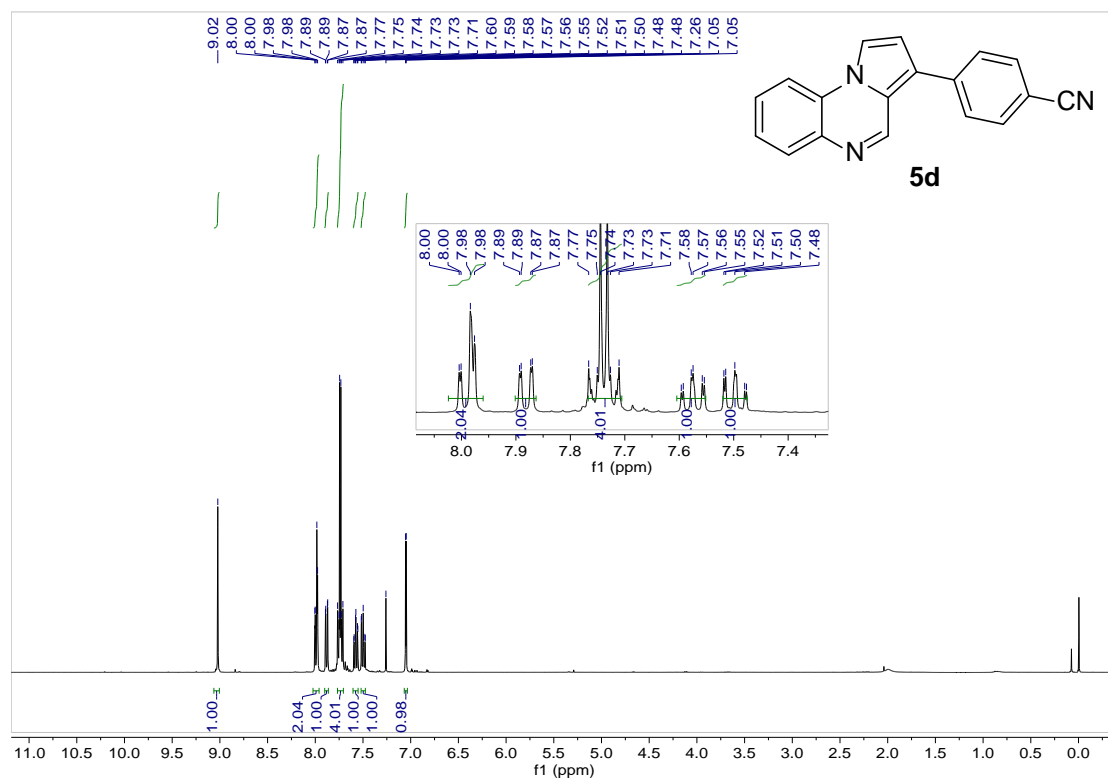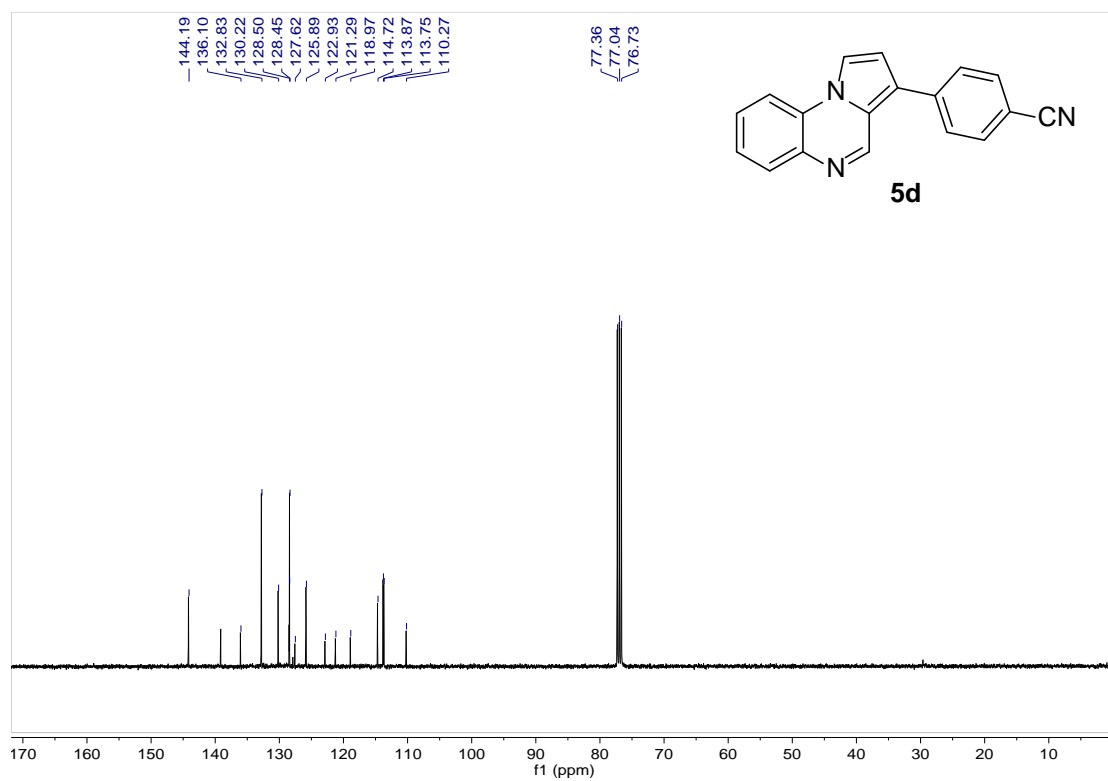

*methyl 4-(pyrrolo[1,2-a]quinoxalin-3-yl)benzoate [5e]*

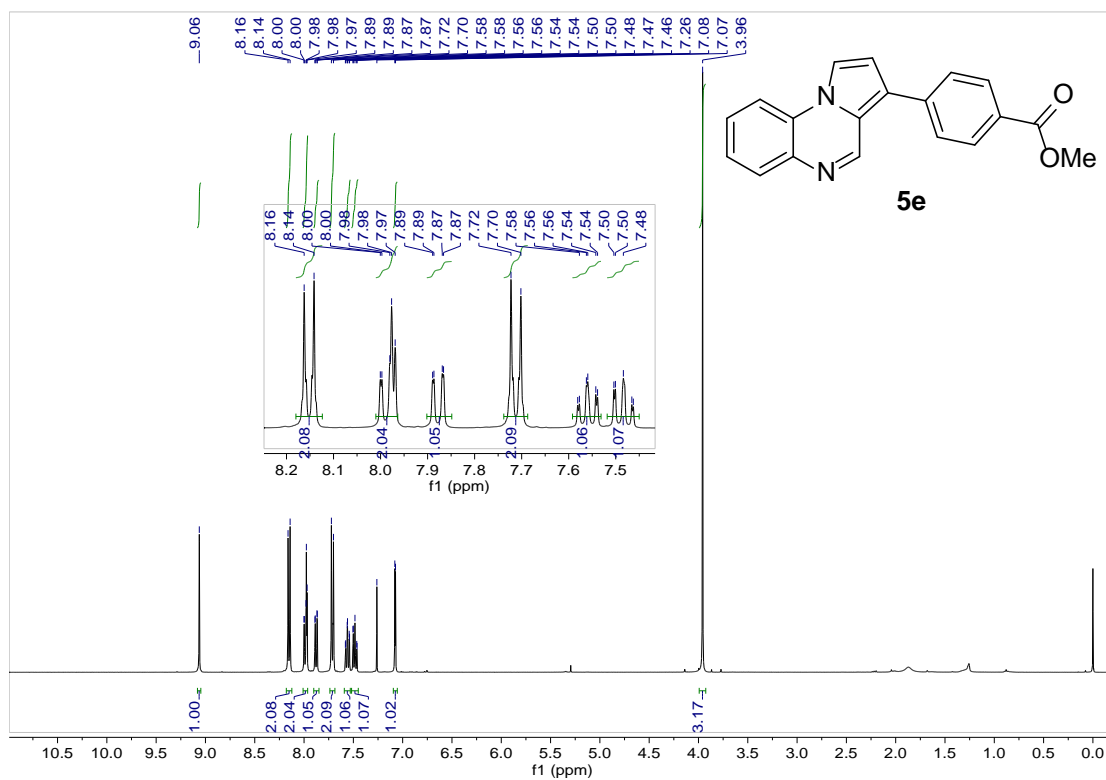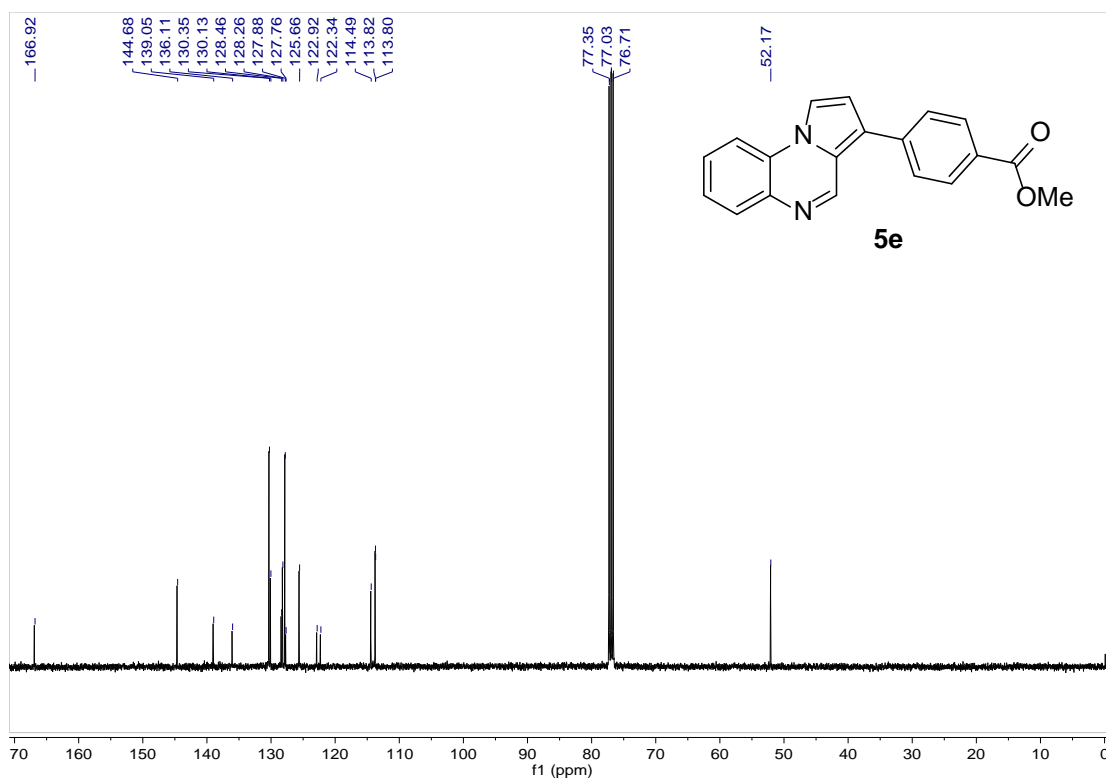

3-(4-vinylphenyl)pyrrolo[1,2-a]quinoxaline [5f]

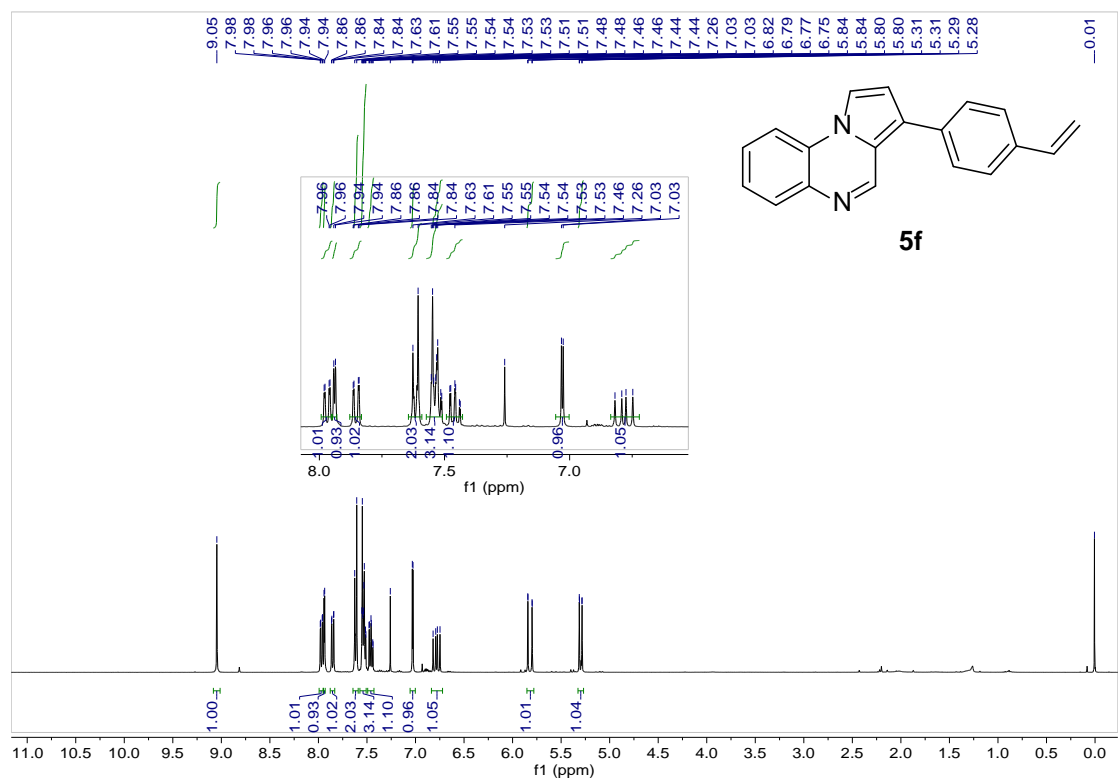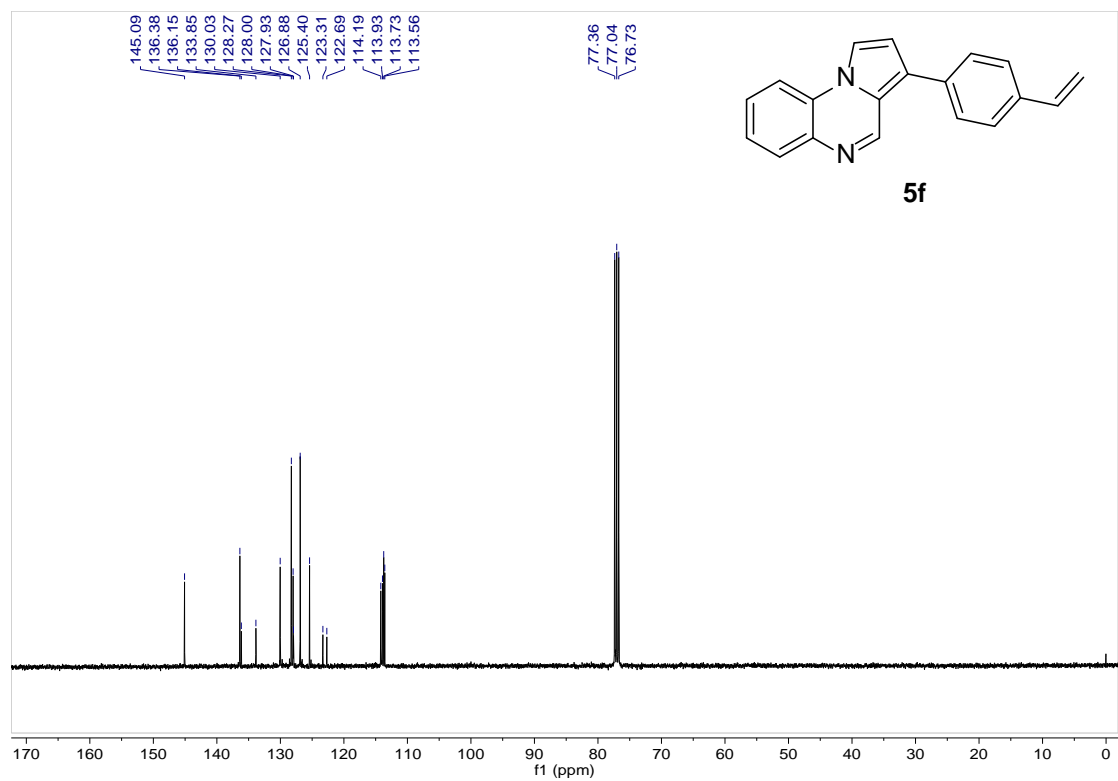

3-(naphthalen-2-yl)pyrrolo[1,2-a]quinoxaline [5g]

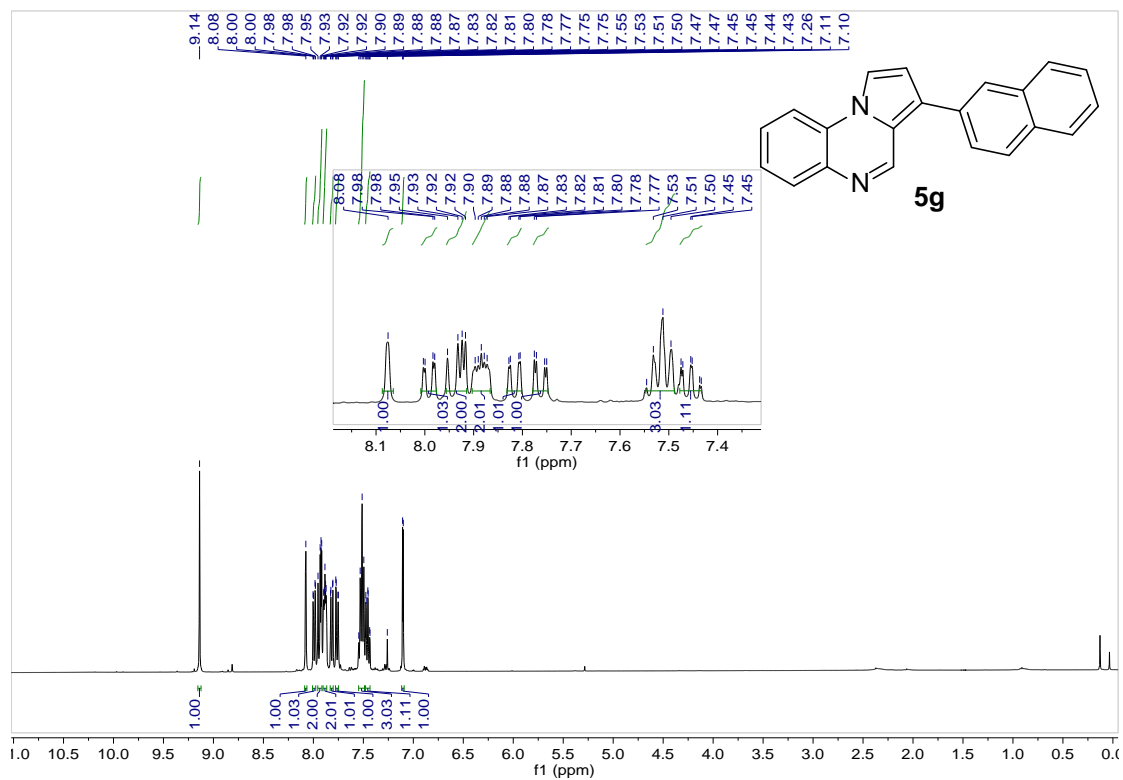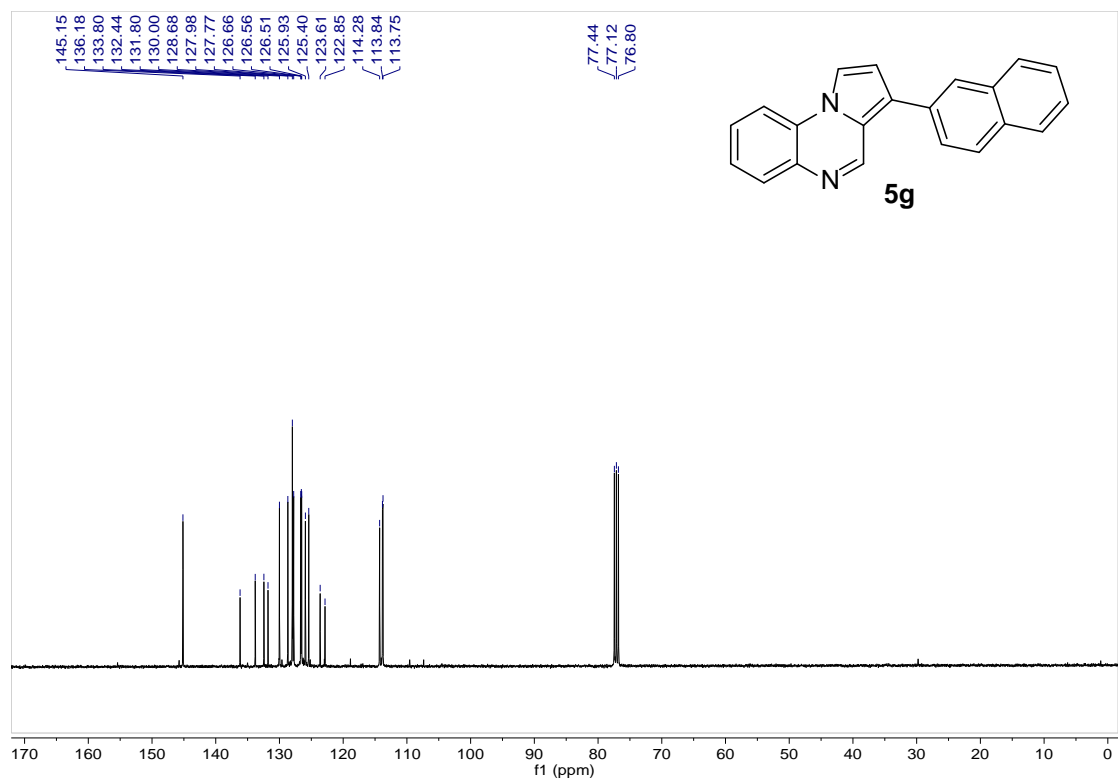

3-(thiophen-3-yl)pyrrolo[1,2-a]quinoxaline [5h]

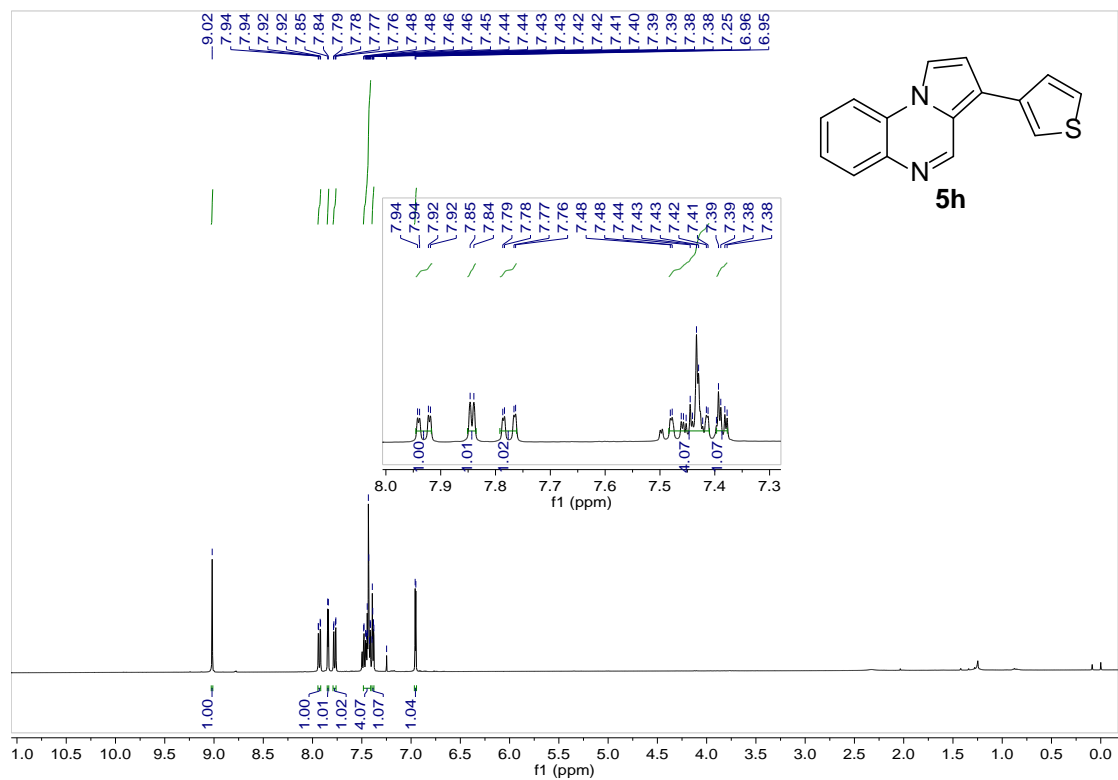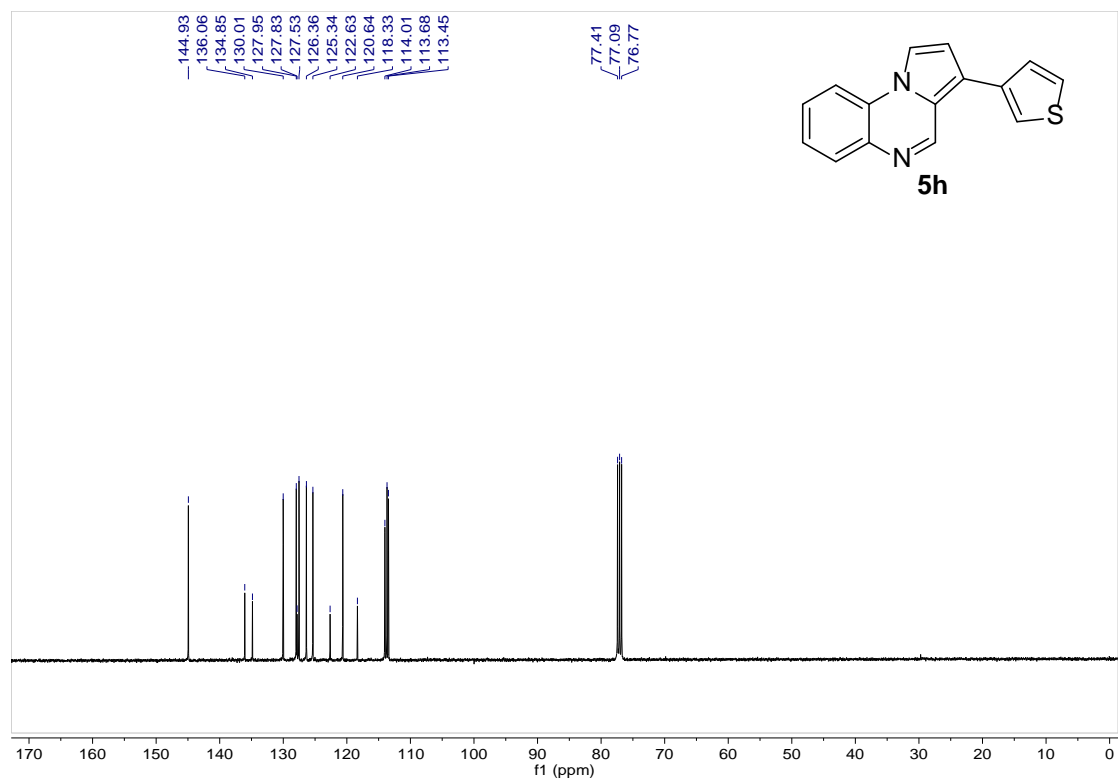

3-(phenylethynyl)pyrrolo[1,2-a]quinoxaline [5i]

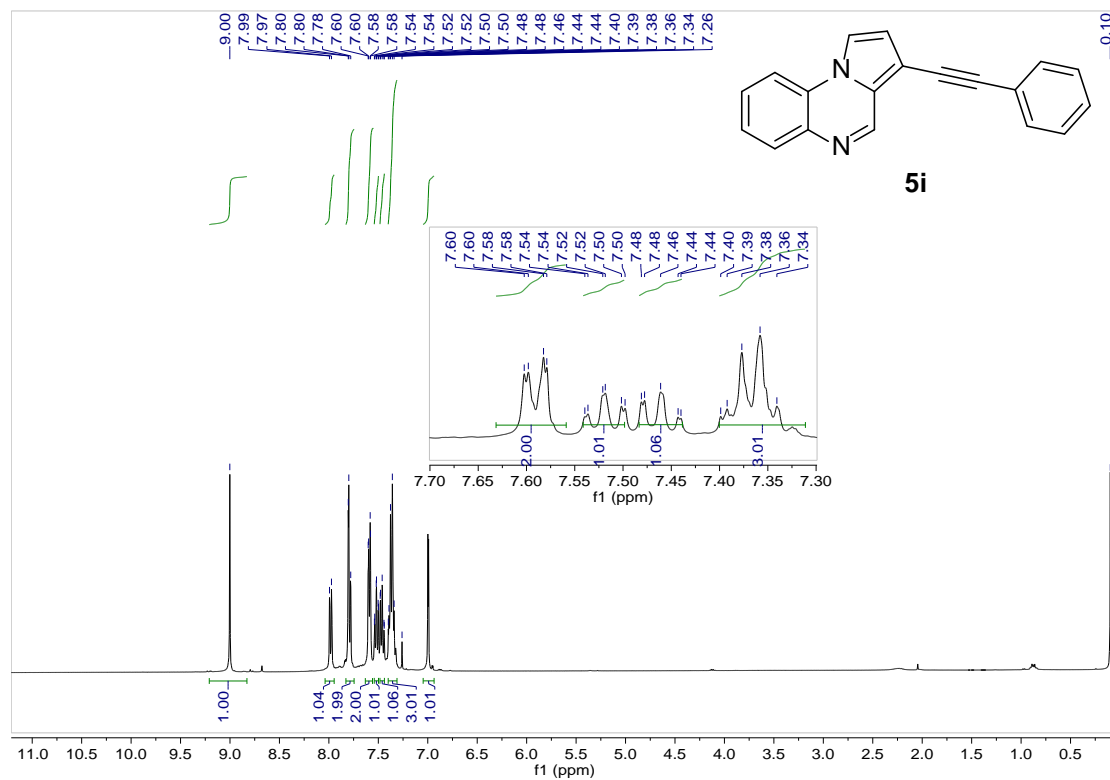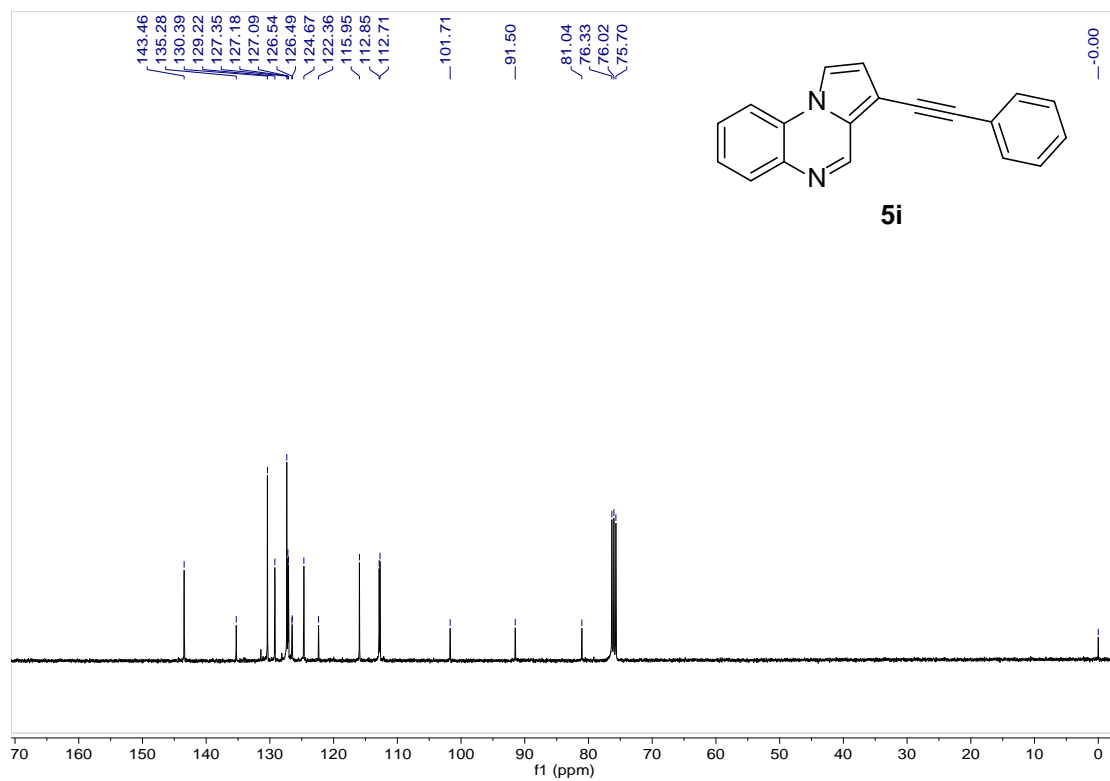



3-(p-tolylethynyl)pyrrolo[1,2-a]quinoxaline [5j]

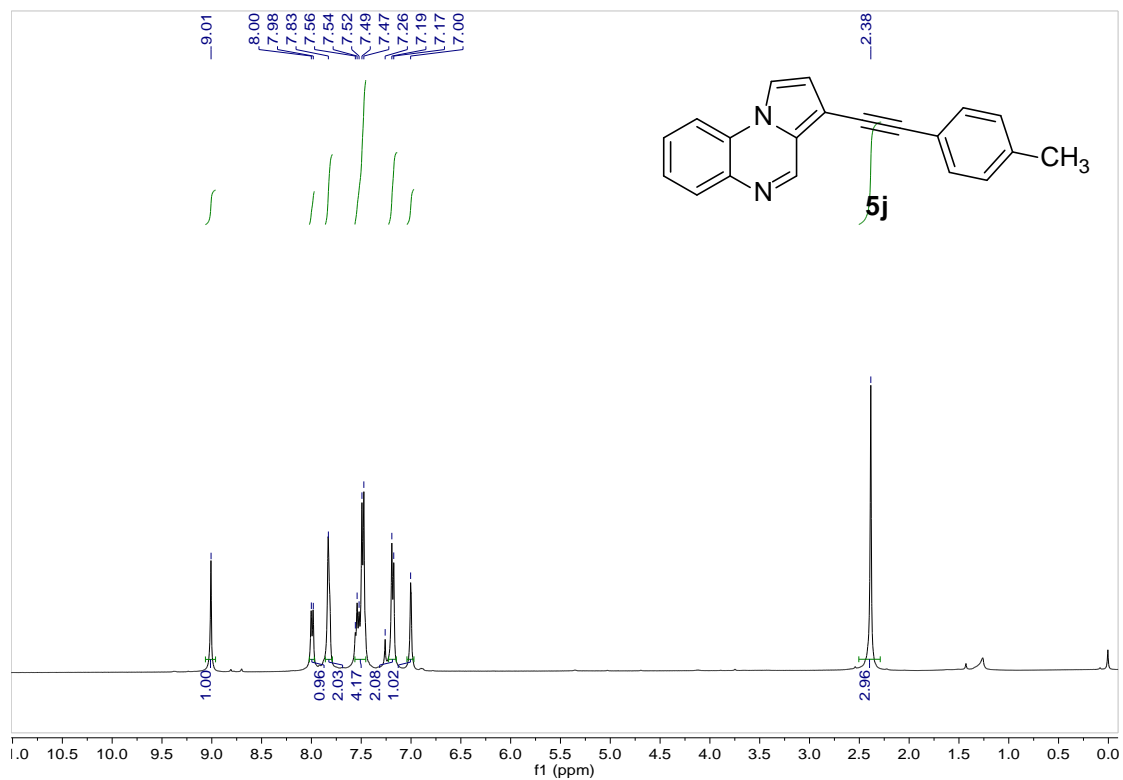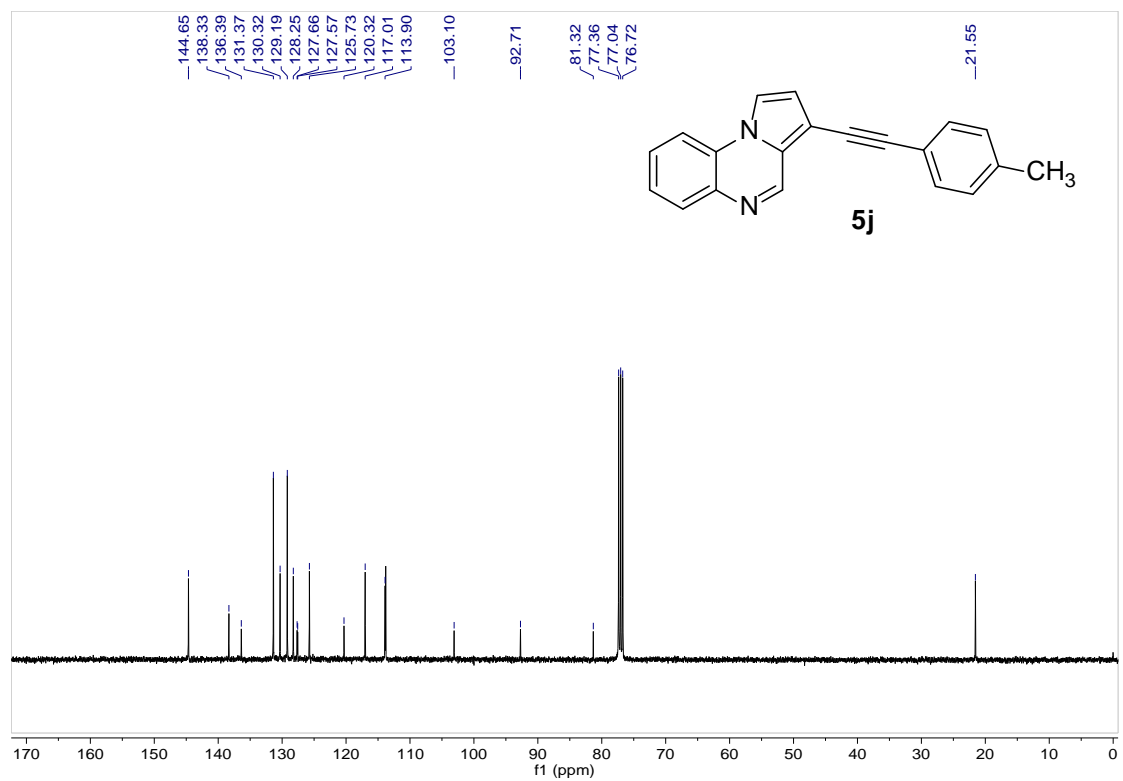

3-([1,1'-biphenyl]-4-ylethynyl)pyrrolo[1,2-a]quinoxaline [5k]

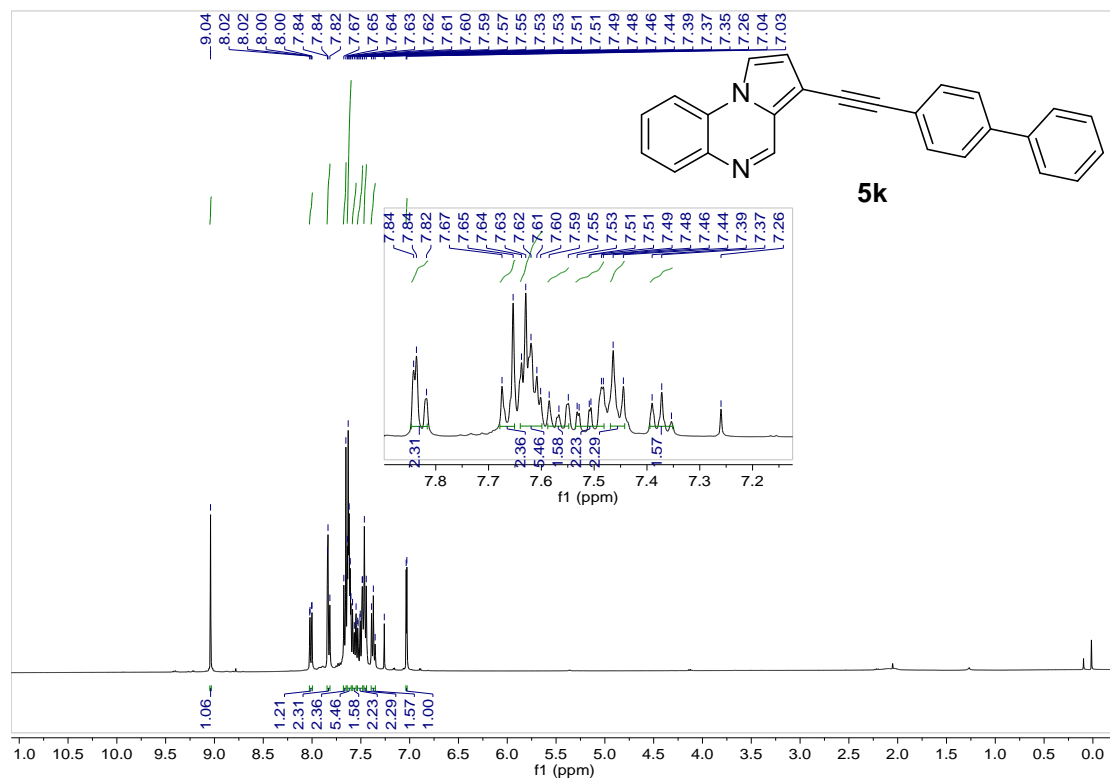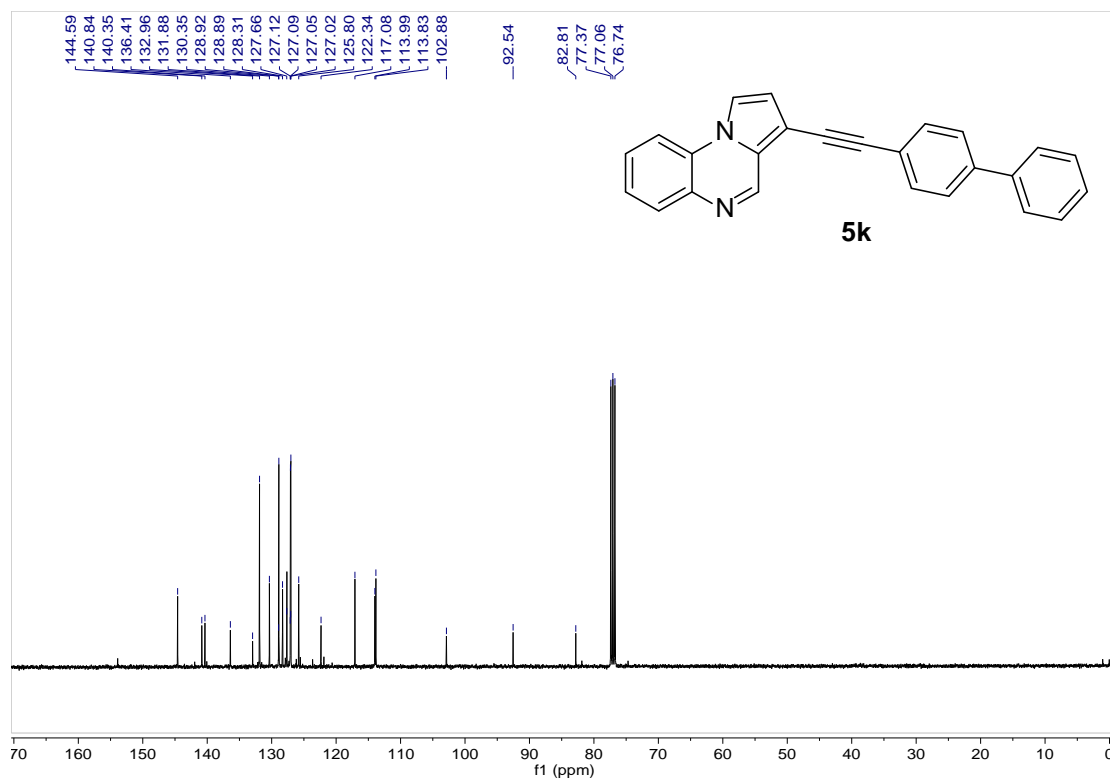

3-((4-methoxyphenyl)ethynyl)pyrrolo[1,2-a]quinoxaline [5I]

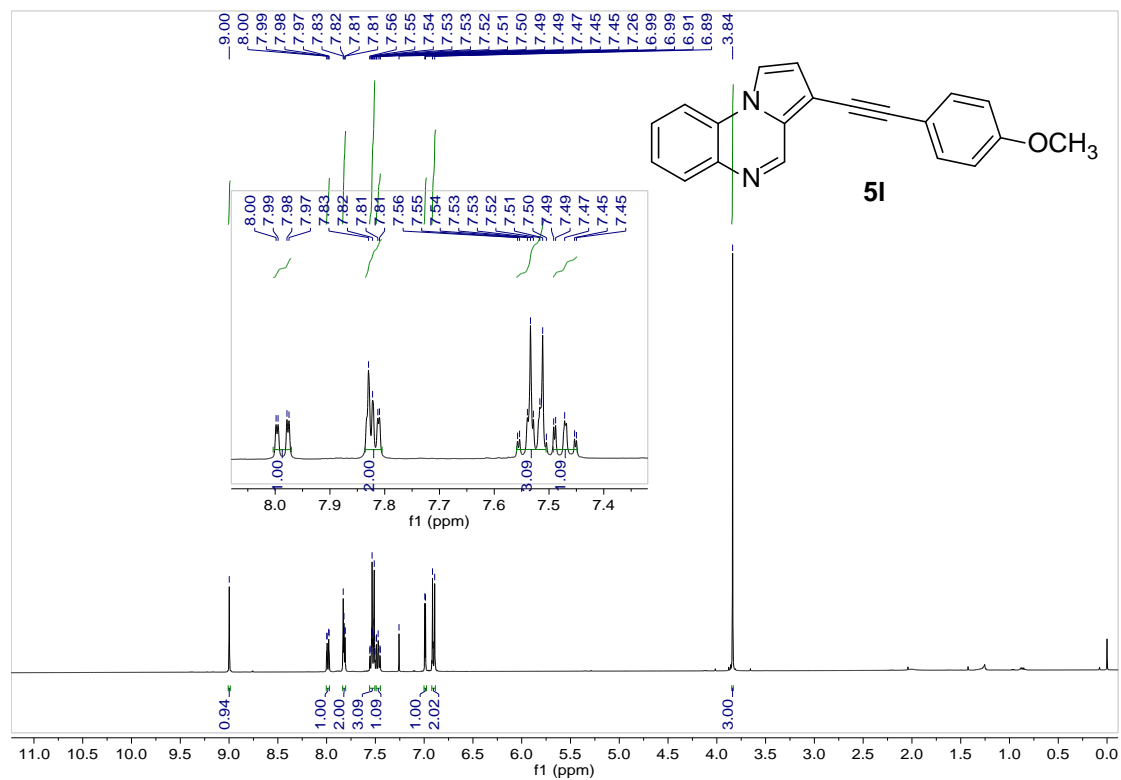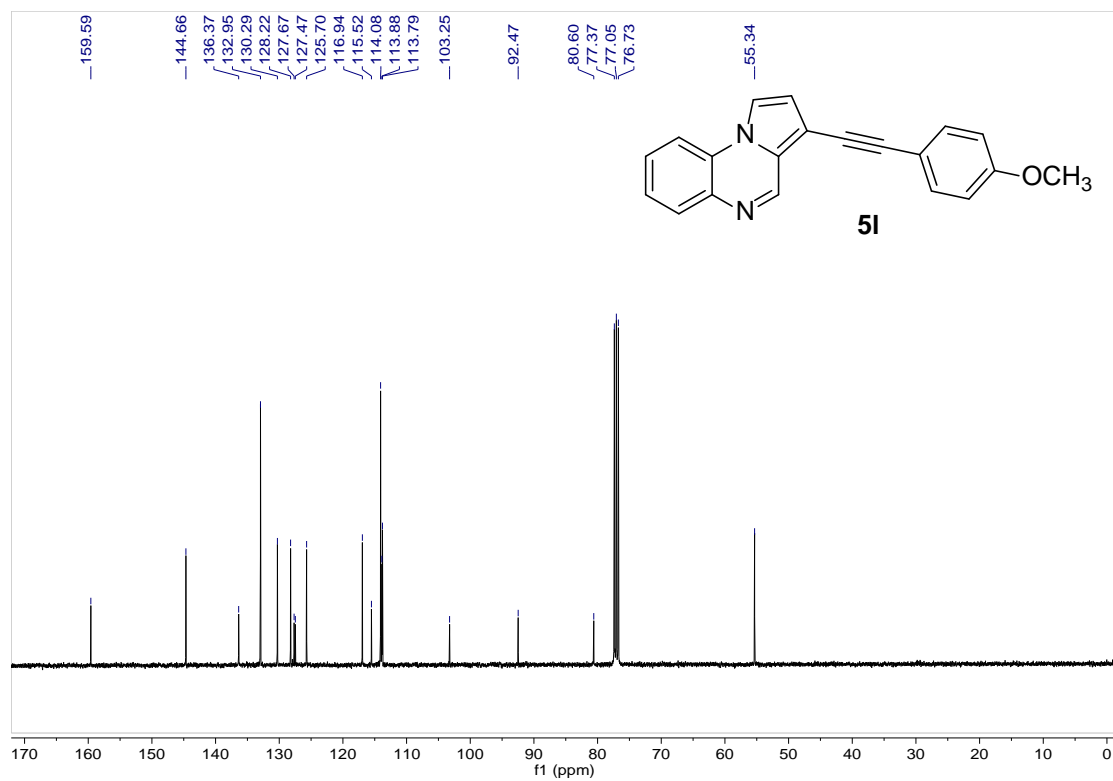

3-((4-chlorophenyl)ethynyl)pyrrolo[1,2-a]quinoxaline [5m]

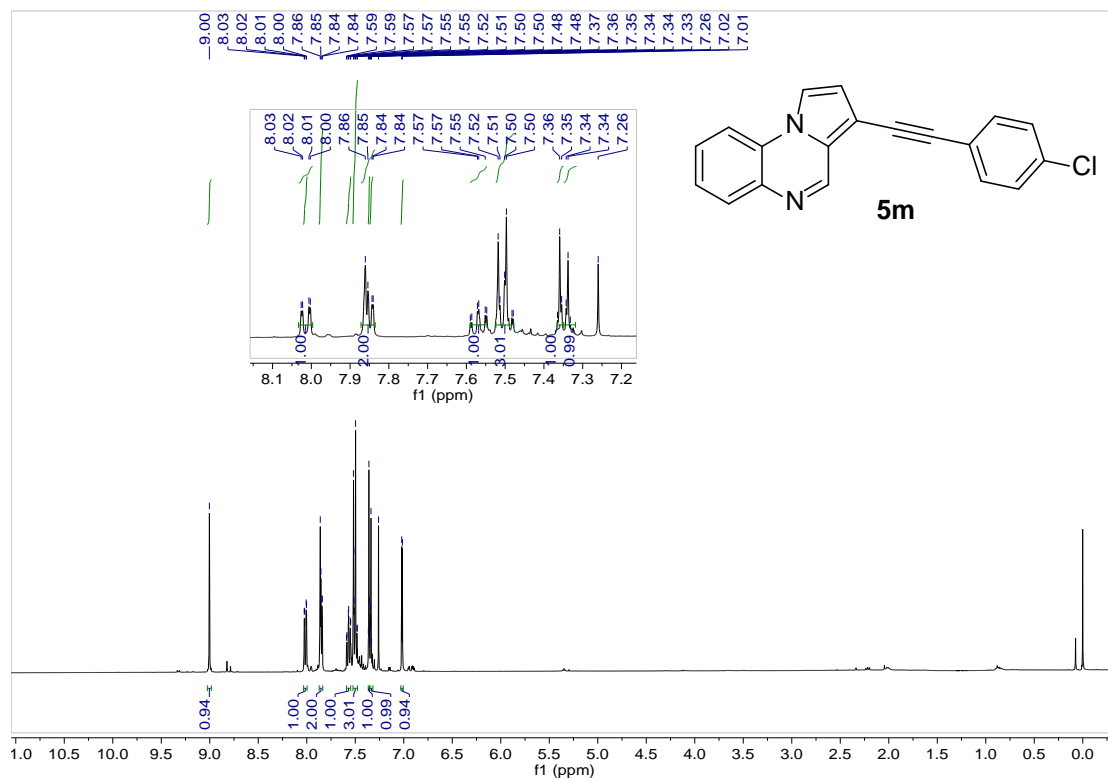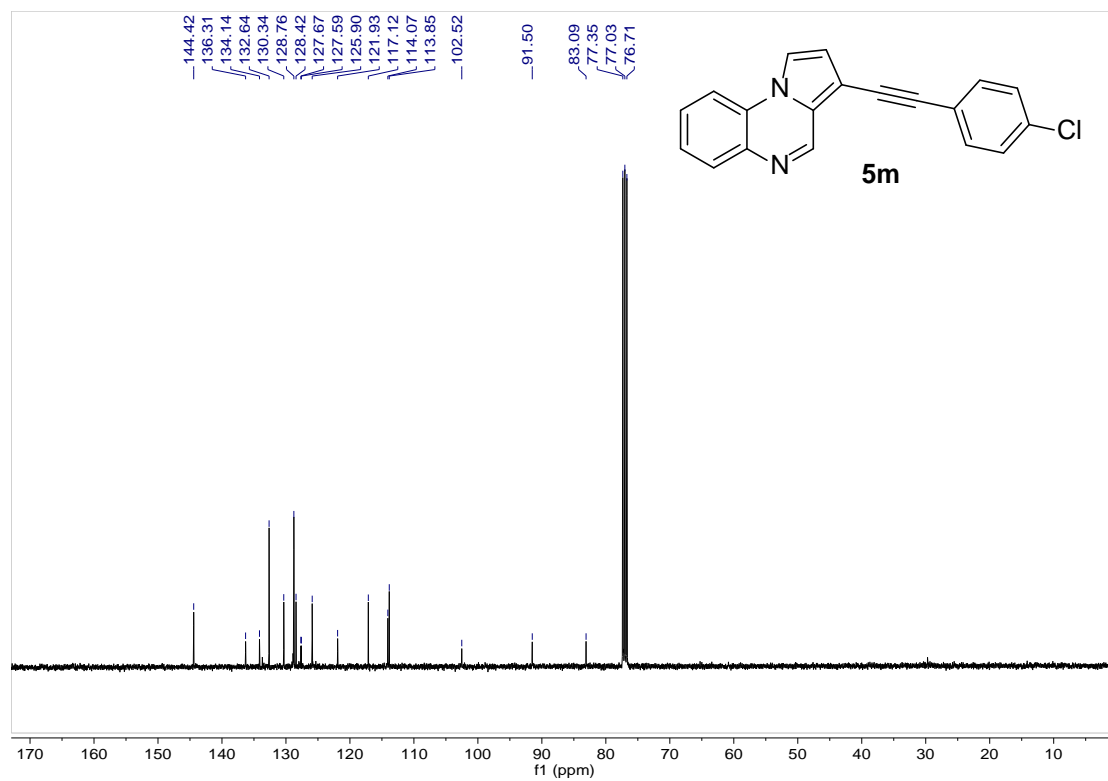

2-methyl-4-(pyrrolo[1,2-a]quinoxalin-3-yl)but-3-yn-2-ol [5n]

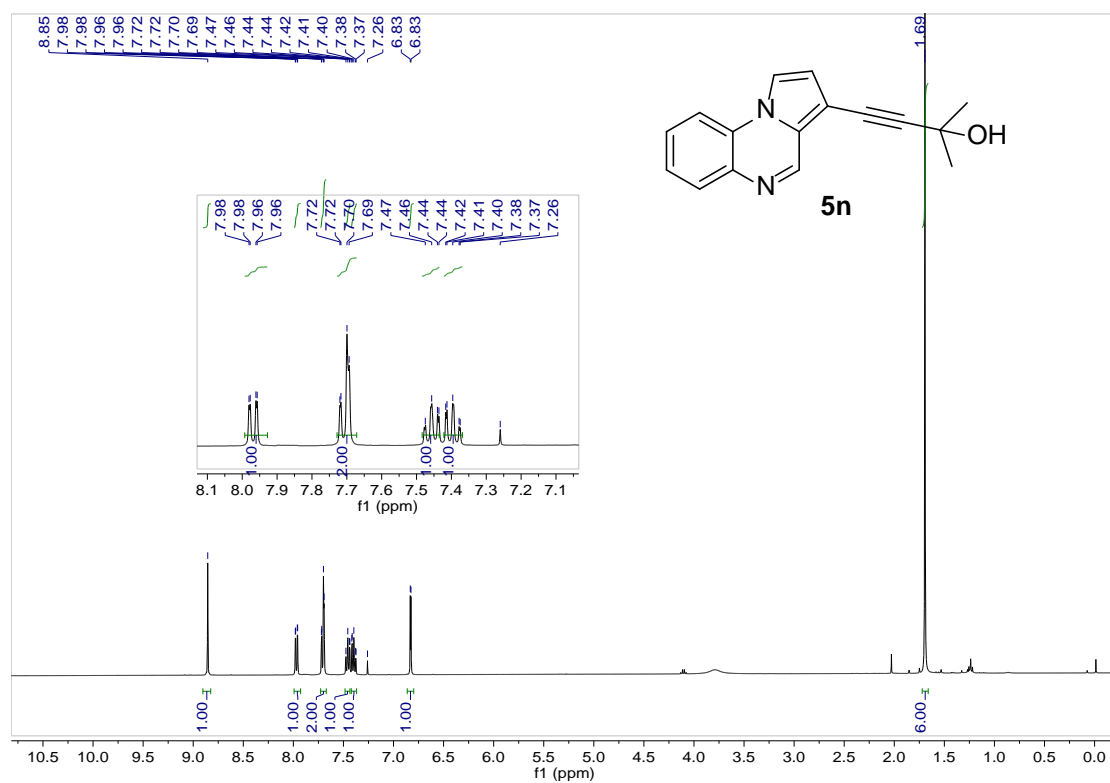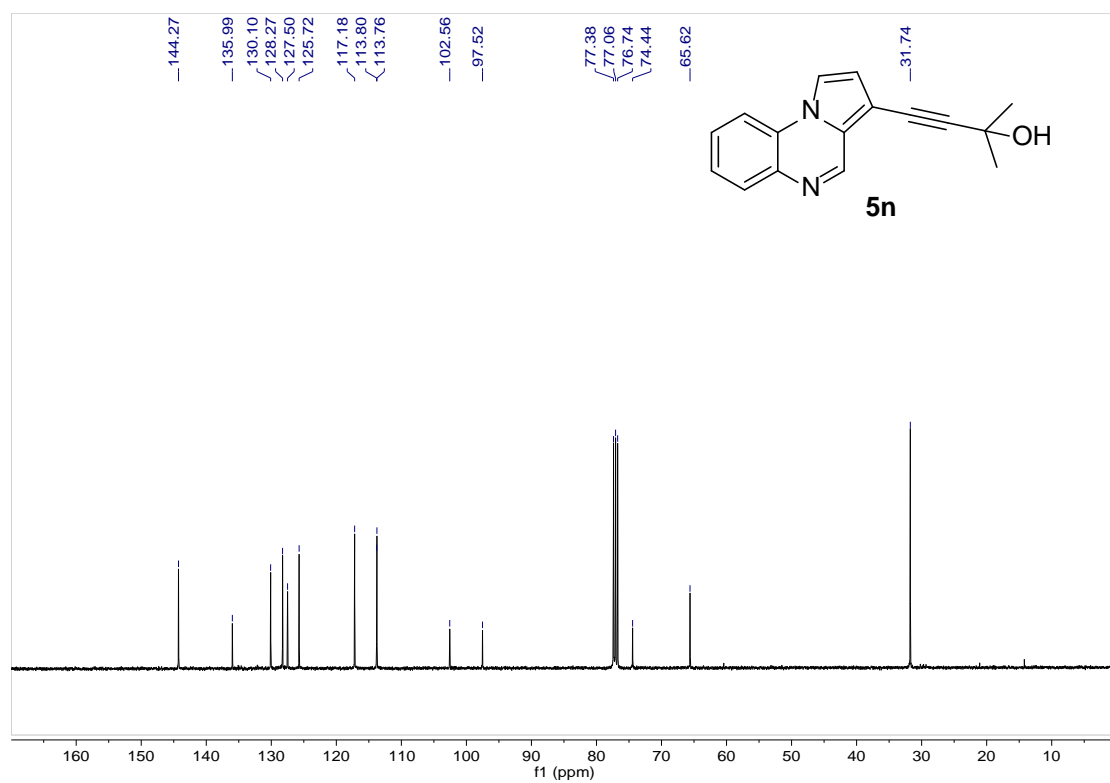

Supplement: d1ob00759a1.pdf [file d1ob00759a1.pdf]
